# Supplementary material for: Integration of a Phosphatase Cascade with the Mitogen-activated Protein Kinase Pathway Provides for a Novel Signal Processing Function
Source: PubMed Central journal article supplement — J Biol Chem. 2009 Nov 6;285(2):1296–310. doi: 10.1074/jbc.M109.055863 (PMC2801257; doi:10.1074/jbc.m109.055863), 2009-11-06
Supplement: supp_M109.055863_jbc.M109.055863-1.pdf [file supp_M109.055863_jbc.M109.055863-1.pdf]

## Supplementary Information:

### Table of Contents:

1. **Supplementary S1:** Complete description of model and additional validation data.
  - A. Detailed model description including Model sensitivity and robustness analysis
- B. Complete details of Model Building
  1. Abbreviations and Initial Conditions
  2. Rate Constants and Parameters and Sensitivities of Parameters
  3. Reactions and Reactions Rate Equations
  4. Parameter Sensitivities for ppMEK response
  5. Parameter Sensitivities for ppERK response
2. **Supplementary S2:** Simulation profiles Raf (pRaf) and MEK (ppMEK)
3. **Supplementary S3:**
  - A. Comparison of simulated and experimental profiles of pLyn, pSyk, pAkt, pPLCg.
  - B. Compares the experimentally derived (Experimental) and *in silico* (Simulated) profiles of ERK phosphorylation following depletion of cells with the phosphatases.
4. **Supplementary S4:**
  - A. Effect of MKP3 knock down by siRNA on MKP1 expression level
  - B. Activation profiles in the presence of DRB(CK2 inhibitor)
  - C. Graded ERK response for various concentrations of Ligand (Fab2)
  - D. MKP3 expression level over 12 hours following BCR stimulation
5. **Supplementary S5:** Effect of PP1 or MKP2 concentration variation on peak ppMEK and peak ppERK responses for varying ligand dose.
6. **Supplementary S6:** Ligand dose response of MEK and ERK phosphorylation to variations in levels of phosphatase activity.
7. **Supplementary S7:** Modulation of dose response by varying phosphatase concentrations.
8. **Supplementary S8:** Extraction of predictive pattern for Figure 7.
9. **Supplementary S9:** Controls of *in-silico* experiments of Figure 6.
10. **Supplementary S10:** Effect of varying phosphatase concentrations of phosphatases on slope of ppERK response to ligand dose.

## A Brief Description of the Model

The BCR is composed of heavy and light chains and the associated immuno-tyrosine activation motifs (ITAMs). ITAMs get phosphorylated in response to BCR engagement by antigen, which then leads to cross linking of the BCR molecules. The BCR dependent phosphorylation of ITAMs is sustained through Syk dependent phosphorylation on three additional sites on the ITAMs. For simplicity, however, we have defined all stages of this multiple phosphorylated states as the doubly phosphorylated BCR (which represents-ITAM + Immunoglobulin part of the BCR). Both singly and doubly phosphorylated BCR activates the src kinase Lyn. Syk, which is immediately downstream to Lyn, is then phosphorylated in a Lyn-dependent manner. This establishes a positive feedback loop at the BCR(1). Antigen-bound BCR also undergoes internalization, although internalized receptors do not contribute towards further signaling(2). Lyn also phosphorylates CD22, a membrane anchored intermediate of B cell signaling. This, in turn, recruits the protein tyrosine phosphatase SHP1 to the membrane. Since SHP1 is a negative regulator of a majority of protein tyrosine kinases including Lyn and Syk, a negative feedback loop is established. Thus a negative and a positive feedback loop are both established in the immediate vicinity of the BCR. Both Lyn and Syk also activate Brutons' tyrosine kinase (Btk). Btk in turn phosphorylates PLCg when the latter is bound to the Syk-phosphorylated BLNK, a major scaffold protein that connects BCR initiated signaling to downstream events(3,4). Lyn via CD19, and Syk via BCAP (B Cell Adopter Protein), activate PI3-Kinase signaling with the consequent generation of PIP3. This leads

to recruitment of cytoplasmic Akt and PDK to the membrane, where PDK then phosphorylates Akt(4).

Syk mediated activation of BLNK also leads to the formation of a BLNK-Grb2-SoS complex, which functions as the RasGDP-GTP exchanger in B cells. The GAP and GEF are modeled according to the scheme as described by Bhalla et. al.(5,6). We've summarized the activation of all PKC isoforms by DAG mediated PKC recruitment to the membrane. RasGTP binds to Raf and resulting complex of Raf-RasGTP is then phosphorylated by PKC. Phosphorylated Raf activates the classical Raf-MEK-ERK pathway. Although lymphocyte signaling also involves RasGRPs in activation of RasGTPs via SOS(7,8), the effect of RasGRPs are better characterized in terms of maintaining the basal levels of RasGTP activity(8). The stimulus induced effect of RasGRPs on RasGTP kinetics is still unclear. Therefore, we kept our model at the level of RasGTP simple and invoked only the classical activation pathway of RasGTP via SoS as the standard GEF. The predicted ligand dose response yielded a good match with the experimental results and more importantly the simplification of the activation pathway of RasGTP did not affect the performance of our model. ERK negatively regulates Raf by hyper phosphorylating it(6,9). In addition Raf is also negatively regulated through phosphorylation at ser259 by activated Akt (10). This process has been modeled accordingly. Dephosphorylation of activated Raf is mediated through PP2A whereas the inactivated form represented by hyperphosphorylation or Ser259 phosphorylation, is dephosphorylated by both PP1 and PP2A.

Several reports in the literature have indicated that phosphorylation of ERK1/2 is also regulated by phosphatases(6). In more recent experiments we have demonstrated that the BCR dependent phosphorylation profiles of all the three constituents of the MAPK module (i.e. Raf, MEK1/2 and ERK1/2) were profoundly influenced when cells were depleted of a range of cellular phosphatases by siRNA. Interestingly, depending upon the phosphatases that were depleted, both negative and positive effects were noted suggesting the existence of diverse modes of regulation (11). Therefore to explore this further, we also incorporated these earlier results for five phosphatases. These were PP1, PP2A, MKP1, MKP2 and MKP3. We started by linking core MAPK module recursively with the phosphatases in a manner that satisfied the experimental data. The phosphorylation profile of ERK was used as eventual output, although the simulated profiles of Raf and MEK1/2 were also compared with the experimental data for the purpose of model validation.

Whereas PP1(or, Calcineurin) was treated as an unregulated pool, the dual specificity phosphatases MKP1 and MKP3 were modeled as previously described(6), but with the modification that phosphorylation of MKP1 was modeled as a single step process. An interesting aspect of our earlier experimental results was the finding that depletion of MKP3 by siRNA resulted in contrasting effects on the BCR-stimulated phosphorylation profiles of MEK and ERK. Whereas phosphorylation of MEK-1/2 was markedly enhanced, the sensitivity of ERK-1/2 to BCR stimulation was attenuated(11). This observation could be rationalized by invoking the related finding of (12), that the PKC substrate Casein kinase2 $\alpha$  both interacts with and phosphorylate MKP3. Thus, although MKP3 is known to negatively regulate ERK1/2 activation, the simultaneous over-expression of CK2 $\alpha$  – however reversed

this effect. This attenuating effect of CK2 $\alpha$  on MKP3 involves phosphorylation of the latter(12). In our present system we found that MKP3 expression was up regulated upon BCR stimulation (S3c.B) and our model depicts that the interaction of CK2 $\alpha$  with this phosphatase modulates the MKP3-mediated co-ordination of the negative feedback loop influencing ERK-1/2 phosphorylation. Importantly our earlier results also implicated MKP1, which is positively regulated by ERK-1/2 as a direct target of MKP3. While modeling the MAPK pathway, however, the possibility that the MKP3 acted simultaneously on both ERK-1/2 and MKP1 seemed unlikely since such a proposition failed to explain the previously described experimental results. We therefore, considered the possibility that the ERK-1/2 and MKP1 may represent alternate substrate for MKP3, with substrate specificity being determined by the phosphorylation state of MKP3. Whereas the non phosphorylated MKP3 functioned as a negative regulator of ERK-1/2 activation, its phosphorylation by CK2 $\alpha$  alters its substrate preference in favor of MKP1, with the consequent attenuation of its activity. This postulates yielded a satisfactory solution after a few optimization and simulation exercises.

Our earlier findings that the depletion of MKP3 from cells by si-RNA resulted in a marked enhancement in the BCR-dependent phosphorylation of MEK-1/2 (11) also prompted us to link phosphorylated MKP3 as a negative regulator of MEK-1/2. Consequently, while phospho-MKP3 would not be expected to directly inhibit ERK-1/2 activation this would nonetheless, be compensated by the inhibitory effect of MKP3 on the upstream kinase MEK-1/2. Further, PP2A has been described as a regulator of the phosphorylation of MEK-1/2(5,6,13). In addition, a marked increase in ERK-1/2 phosphorylation was also observed under these conditions. We accounted for

**a. Simulated profile of restimulation following 6hrs after first stimulus**

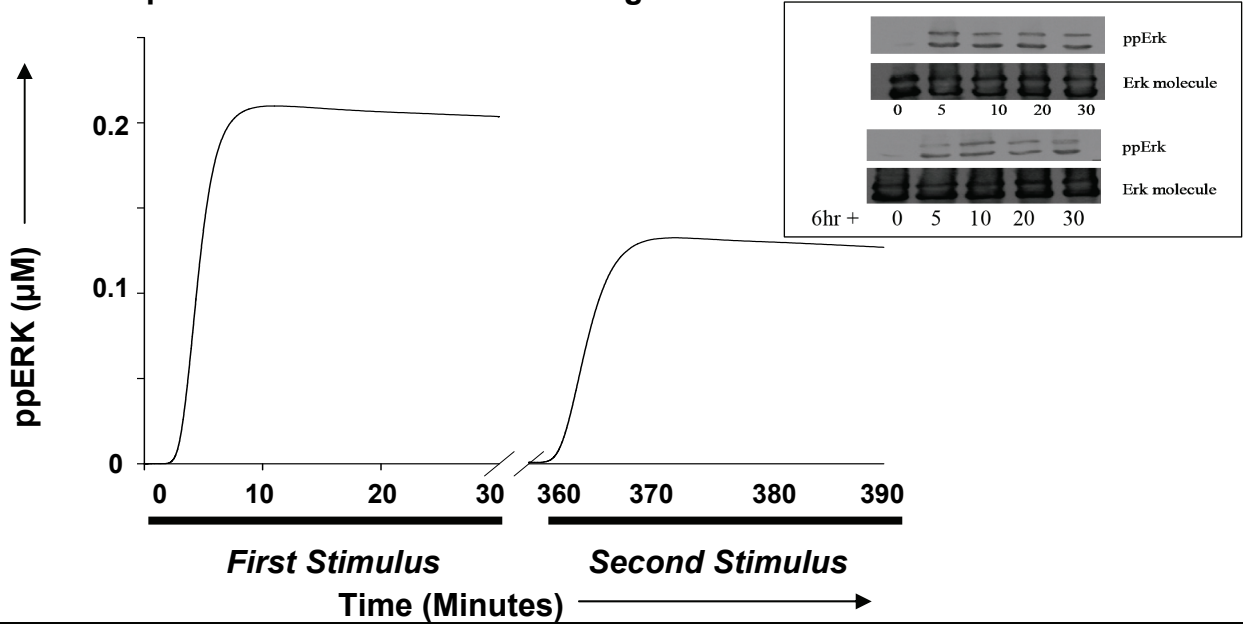

**b.**

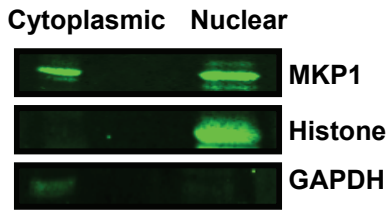

**c.**

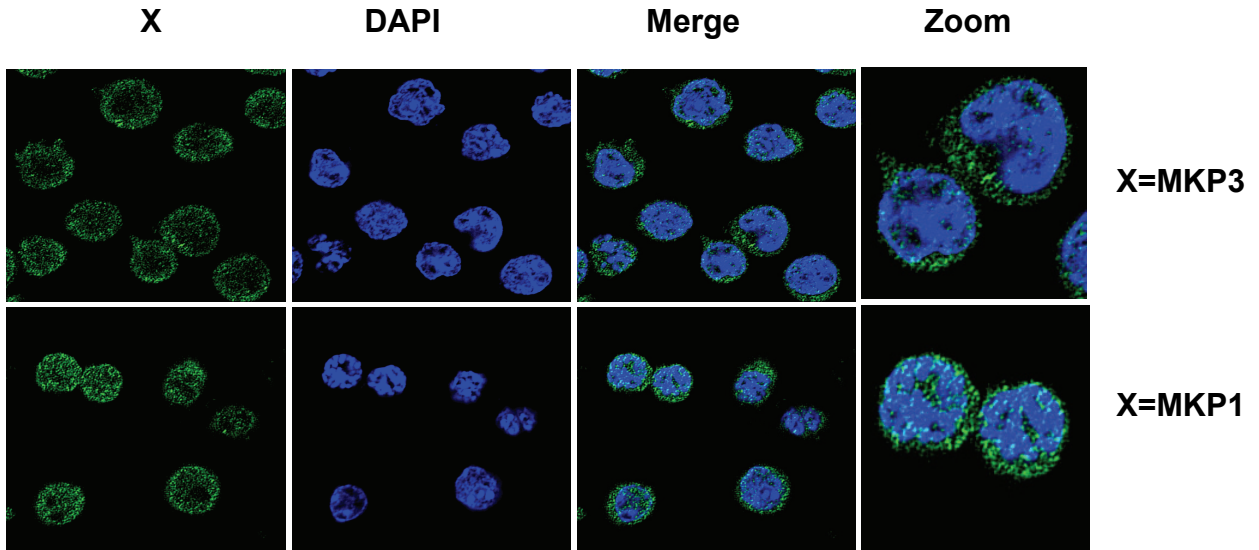

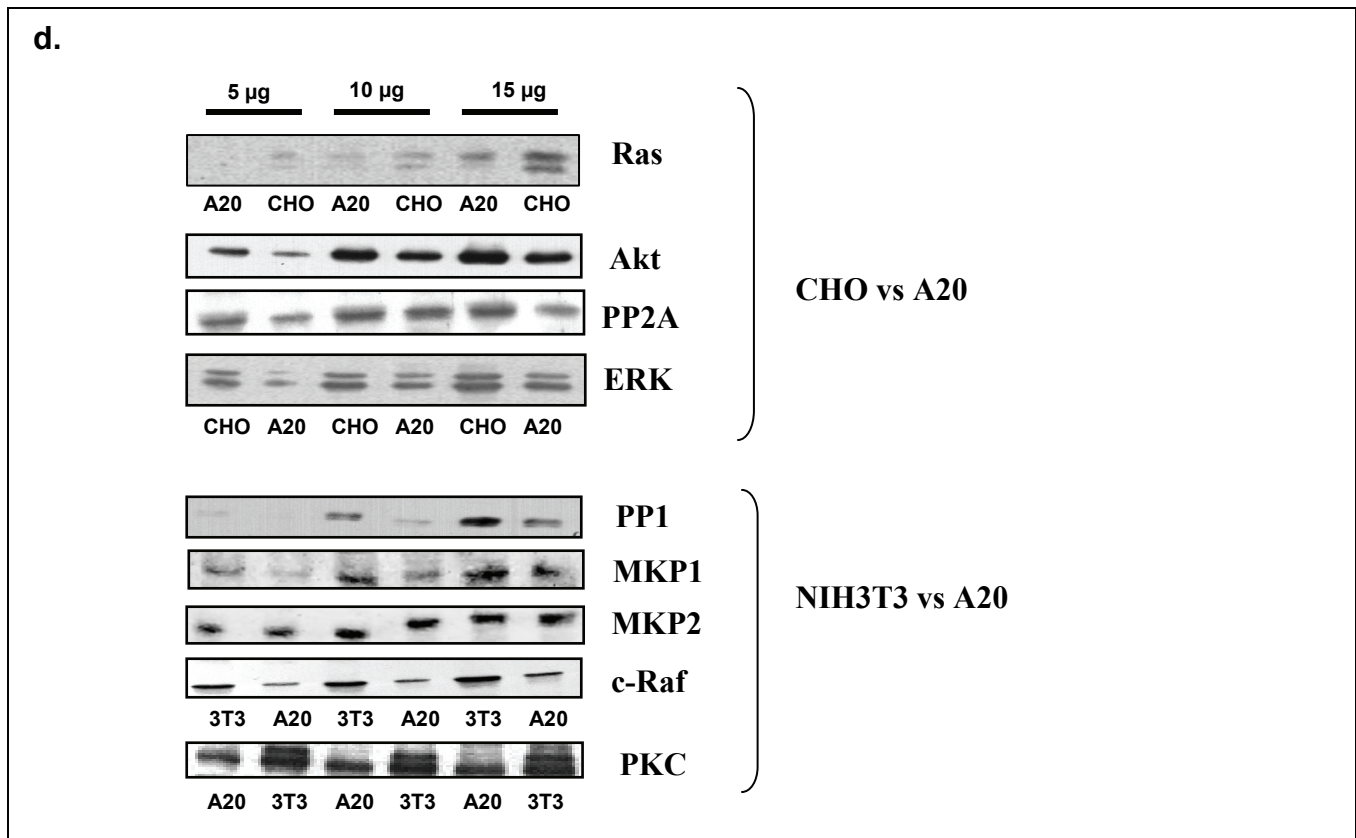

**Figure S1.1: (a).** Shown here the simulation profile of ERK phosphorylation (ppERK) following a first stimulus of thirty minutes and a second stimulus 6 hours after the first stimulus. Inset in the top panel shows the Western blot from the similar experiment on A20 cells. A good correspondence between the Western blot results and the *in silico* prediction is clearly evident here. **(b).** This panel shows the result of an experiment where nuclear and cytosolic fractions from A20 cells are probed for MKP1. These blots were also probed for the corresponding marker proteins for nuclear (histone) and the cytoplasmic (GAPD) fractions. While the presence of MKP1 in both fractions is evident, the selective presence of the marker proteins in the appropriate fractions confirms the absence of any cross contamination. **(c).** A more direct experiment using confocal imaging further confirmed that both MKP1 and MKP3 are present in the cytoplasmic and in the nuclear compartments. For this experiment, A20 cells were fixed and stained (green color) for MKP3 (top panel) and MKP1 (lower panel). Blue color shows the nuclear stain by DAPI. **(d).** Western blot-based determination of the concentration of signaling molecules in A20 cells by titrating against the corresponding lysates from NIH3T3 and CHO cells. The concentration of our molecules of interest were previously determined in either of these cell lines(1,2)). Blots shown are representative of 3 independent experiments. Indicated amounts of the total protein were loaded and the resolved lysates probed for the indicated proteins. Band intensities for each protein obtained in A20 cells were then compared with the corresponding intensities for the same protein in the lysate used as the standard (i.e CHO or NIH3T3) to calculate its relative concentration in A20 cells. The final values used represented the mean value obtained for the triplicate sets at each concentration of the total cellular protein. Further, a parallel probe for GAPD was used as the loading control and the ratio of the band intensity of the target protein versus that of GAPD in each lane was used for normalization. This procedure is similar in principle to that described earlier (3).

1. Bhalla, U. S., and Iyengar, R. (1999) *Science* **283**(5400), 381-387
2. Hatakeyama, M., Kimura, S., Naka, T., Kawasaki, T., Yumoto, N., Ichikawa, M., Kim, J. H., Saito, K., Saeki, M., Shirouzu, M., Yokoyama, S., and Konagaya, A. (2003) *Biochem J* **373**(Pt 2), 451-463
3. Schoeberl, B., Eichler-Jonsson, C., Gilles, E. D., and Muller, G. (2002) *Nat Biotechnol* **20**(4), 370-375

these unexpected findings by considering the possibility that phosphorylation of MKP3 could be reversed by the direct action of PP2A. Thus in addition to de-phosphorylating Raf and MEK-1/2, PP2A is also likely to function in regulating the balance between the phosphorylated and non-phosphorylated pools of MKP3. The resulting model for the MAPK module yielded a prediction for the time dependent phosphorylation of ERK-1/2 that was in excellent agreement with the experimentally obtained results.

Previous studies have shown that MKP1 is primarily localized within the nuclear compartment of cells. At least in A20 cells, however, we found that this phosphatase was in fact distributed between both the nuclear and the cytoplasmic and nuclear compartments. This was first revealed from experiments involving confocal microscopy where both nuclear- and cytoplasmic-localization of MKP1, with a respective distribution of 60% versus 40%, was clearly evident (Supplementary Fig. S1.1c). We further confirmed these findings through an alternate approach wherein A20 cells were lysed, and the cytoplasmic and the nuclear extract fractions were separately obtained. These fractions were then individually probed for the presence of MKP1 by a Western blot analysis. As shown in Supplementary Figure S1.1b, the presence of MKP1 could clearly be detected in both the fractions. Further, the relative distribution between the cytoplasmic and the nuclear

fraction seen here was consistent with that obtained in our confocal microscopy experiments (Supplementary Fig. S1.1c). Importantly, the presence of MKP1 in both fractions in Supplementary Figure 1.1b was not due to cross contamination between the nuclear and cytoplasmic fractions. The purity of each fraction could be demonstrated by the fact that, as expected, histone H1 was present only in the nuclear but not the cytoplasmic fraction. Similarly, a Western blot analysis for GAPD revealed the selective presence of this protein in the cytoplasmic but not the nuclear fraction (Supplementary Fig. 1.1b), thus confirming the absence of any significant level of cross-contamination between the two sample sets.

The above results thus identify a cascade of phosphatases (PP2A-MKP3-MKP1) that is aligned in parallel with the MAPK cascade (Raf-MEK-ERK). ERK activation also leads to transcriptional up-regulation of MKP1 and MKP3. We have achieved the same through a reaction scheme similar to as proposed by (6), although the rates are scaled according to the present concentration of these two phosphatases. The concentrations of c-Raf, MEK, ERK, PP2A, MKP1, RasGDP-GTP total, Akt were determined by Western blot titrations that compared against corresponding levels present in NIH3T3 and CHO cells (See Supplementary Fig. S1.1d). Concentrations of the remaining molecules were estimated.

## **Assumptions and criteria for implementation of the model :**

Few important Considerations have been taken while implementing model in mathematical form which are as follows:

1. Since a detailed description of the early signaling events at the BCR signalosome is currently unavailable, the steps were minimized and unnecessary complexity was avoided. For this, the parameters were constrained to the extent possible for describing the kinetics of these events without affecting the known outputs, and keeping the system simple. For example, phosphorylation of BLNK at multiple sites was represented by a single step. Further, the four different (1+ 3) events of phosphorylation at the ITAMs (BCR in the model) by BCR activation and Syk mediated feedback were simplified in two steps (1 by BCR engagement + 1 by Syk) keeping the positive feedback effect of Lyn-Syk-ITAM feedback loop intact.
2. Activated to unactivated ratios were maintained for different molecules in accordance with their cytoplasmic locations and mode of activation. Compartmentalization was not considered in our analysis.
3. In the case of regulation by multiple phosphatases, the experimental results obtained by Western blot analyses cannot be directly correlated to exact relative levels of activated molecules since quantitation by this technique is not linear over a large range. Thus a true regression scheme cannot be employed for phosphatase-mediated perturbations involving large variations in phosphorylation levels. Further, shifts in baseline phosphorylation levels also cause problems, which are not usually encountered in the traditional model building exercises where maximum phosphorylation levels of substrates following on receptor activation are considered as 100%, and regression is then applied for a comparatively smaller range of modulations in phospholevels. However post implementation techniques were employed for assessing regression stability of the parameters. These were Multi Parametric Sensitivity Analysis (MPSA) and Partial Rank Correlation Coefficients (PRCC), as described later in sensitivity analysis and robustness scores.
4. Parameters describing the kinetics of molecules on the network periphery were grouped together to define the representative kinetic behavior relevant to the present MAPK module.

## Sensitivity Analysis of the Model:

Having constructed the model, we performed an exhaustive sensitivity analysis for identifying the key regulatory features of BCR induced MAPK (ERK). Table S1.1 shows selected sensitivities and their corresponding parameters with their reaction scopes. Sensitivity analysis was done using four different methods using SBML\_SAT (14) a MATLAB toolbox for sensitivity analysis of systems biology models which is based on SBML. SBML\_SAT is free and available at (<http://sysbio.molgen.mpg.de/SBML-SAT/>).

We used four different methods of sensitivity analysis on integrated response of model output variables. All these methods of analysis identified BLNK-mediated activation of the BLNK/Grb2/SOS complex, which functions as the RasGTP-GDP exchanger upon BCR stimulation. BLNK has a key role in B cell receptor induced signaling. It serves as a scaffold for SoS and, therefore, couples Syk with downstream signaling events of BCR signalosome (15-17). Global sensitivity analysis methods use multiple parameter variations. The scores identify the Multi-parametric Sensitivity analysis and give Kolmogorov-Smirnov (K-S) statistics values for the distance between frequencies of the acceptable and unacceptable parameter sets generated through random perturbations. That is, MPSA reveals the uncertainty of the parameter space used. Thus the K-S value here specifically revealed that *kcat\_123* (the enzymatic action of ppMEK on ERK) and *kf\_124* (binding of pERK to the ppMEK), had a significant effect on the ppERK response. This has also been reported earlier, and the consistency of these parameters found in all the methods employed suggests that this two-step phosphorylation is an important step in shaping the both integrated responses and the maximal responses of ppERK. Interestingly,

the two-step phosphorylation of ppMEK does not actually give high K-S value or local sensitivity coefficient for the enzymatic action of pRaf on MEK (*kcat\_104*), and this remains consistent on both the integrated and maximum response of ppMEK. The detailed Sensitivities of ppMEK and ppERK are provided with the parameters in S1B.

Weighted average of local sensitivity (WALS) which uses the weighted average of local sensitivity indices on parameters space and calculate the least square errors of reference simulation and perturbations. The scores of WALS here primarily identified the component important for the dose response components of present network including the main phosphatases of the model and the BCR-LYN-SYK positive feedback loop. The popular Global Sensitivity Analysis (GSA) method of regression-based rank transformation method Partial Rank Correlation Coefficient (PRCC) uniquely isolates the *vm\_7* (*Vmax* of CD22 phosphorylation) which is the part of Negative auto-regulatory loop at BCR dependent Lyn activation, and responsible for the membrane recruitment of SHP1 which negatively regulate and shapes the activity of BCR signalosome. PRCC also uniquely identified the binding of MEKpp to PP2A, the negative regulator of both MEK and Raf activity, both in the Integrated and maximum response of ppERK. This identifies that the first step of ppMEK binding to PP2A competes along with pMKP3, which is another negative regulator of MEK activity in the phosphatase cascade. In all cases of ppERK and ppMEK, the integrated response was invariably affected by the action of PP1 on pRaf, which we found to be true experimentally as well (11). PRCC also revealed the role of the initial conditions on various model output variables and is shown in figure S1.2.



Fig S1.3 to S1.8 shows the various output variables and their sensitivities for integrated and maximum responses by the different methods of LSA and GSA. The sensitivity of time dependent responses were also measured (data not shown), and this was consistent with the present results and model behavior. The model was also tested for various perturbations and combinations of the initial concentrations of Raf-MEK-ERK and

we found that the solution for the SAM converged to the same response spectrum. Although we identified parameters which were sensitive to perturbations, the sensitivity of these parameters did not affect model output significantly since the cut off for the highlighted results chosen was as low as 10% of the maximum possible sensitivity in each case. Thus model was robust with respect to variations in parameters and initial conditions.

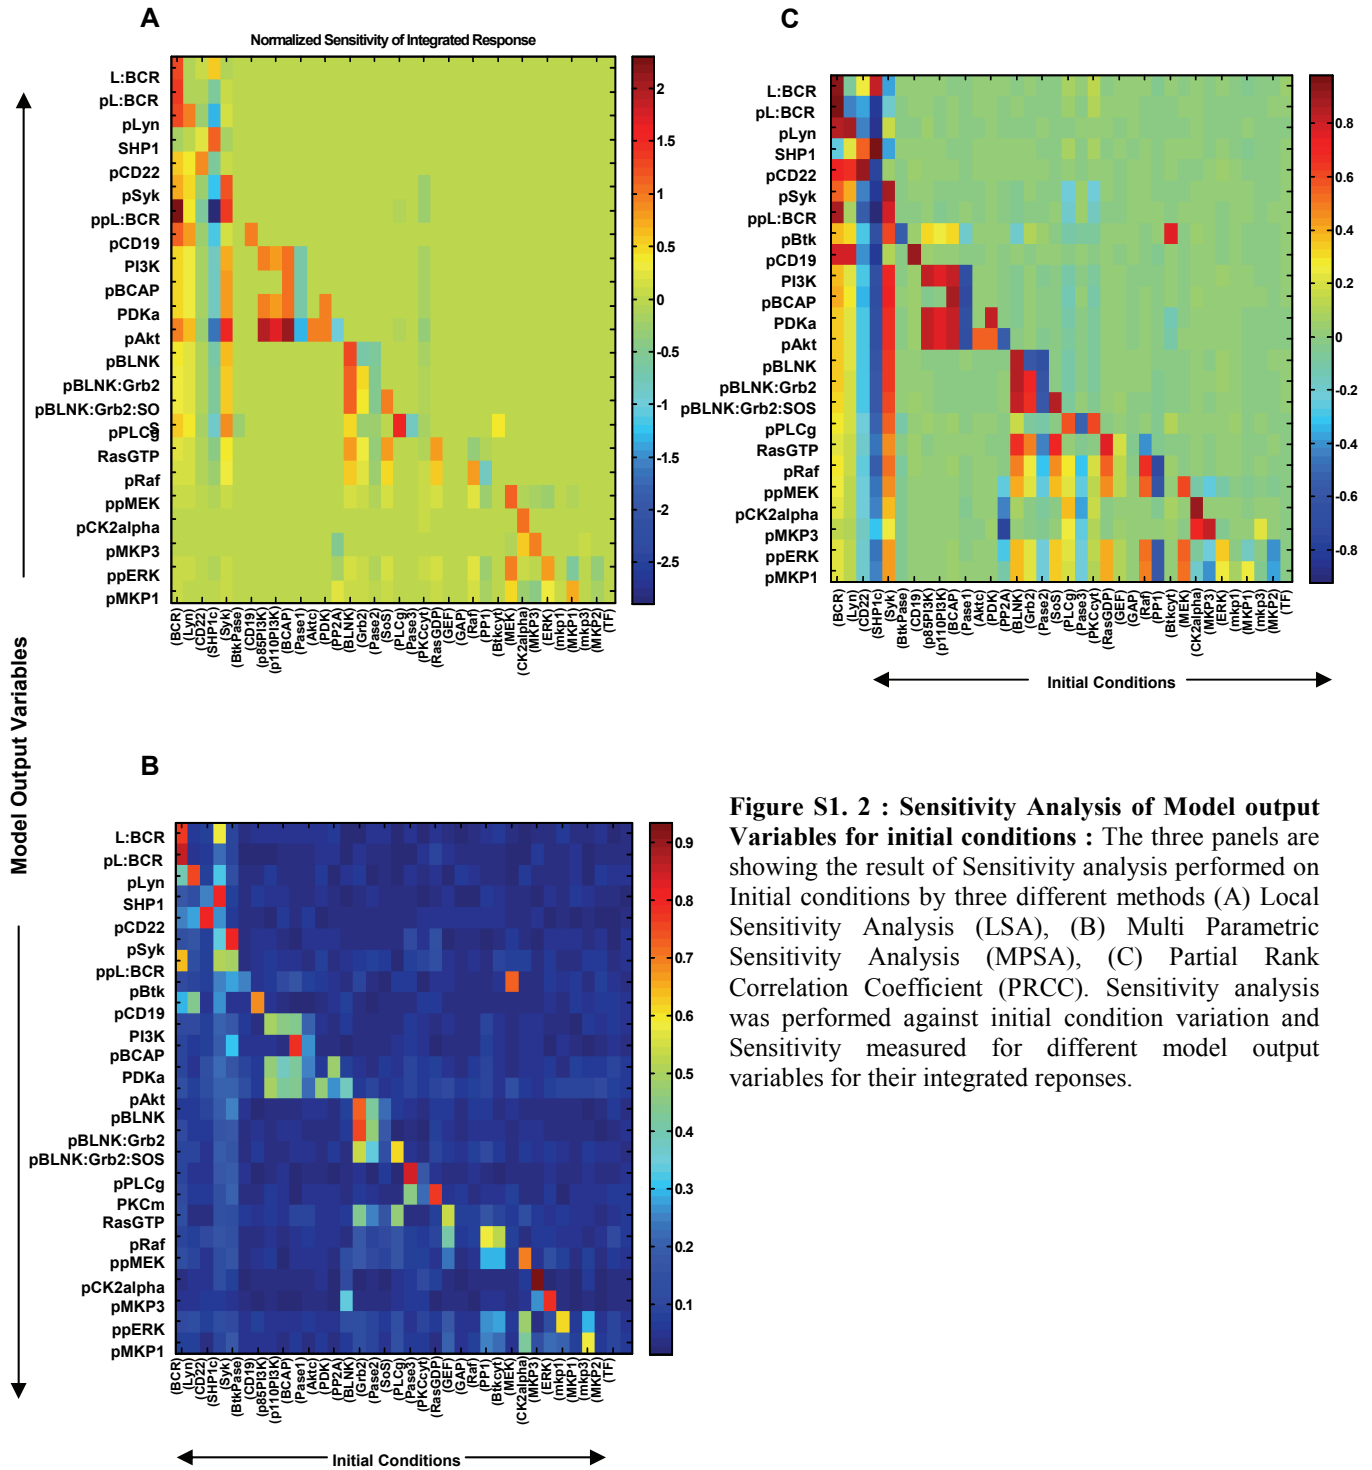

**Figure S1. 2 : Sensitivity Analysis of Model output Variables for initial conditions :** The three panels are showing the result of Sensitivity analysis performed on Initial conditions by three different methods (A) Local Sensitivity Analysis (LSA), (B) Multi Parametric Sensitivity Analysis (MPSA), (C) Partial Rank Correlation Coefficient (PRCC). Sensitivity analysis was performed against initial condition variation and Sensitivity measured for different model output variables for their integrated responses.

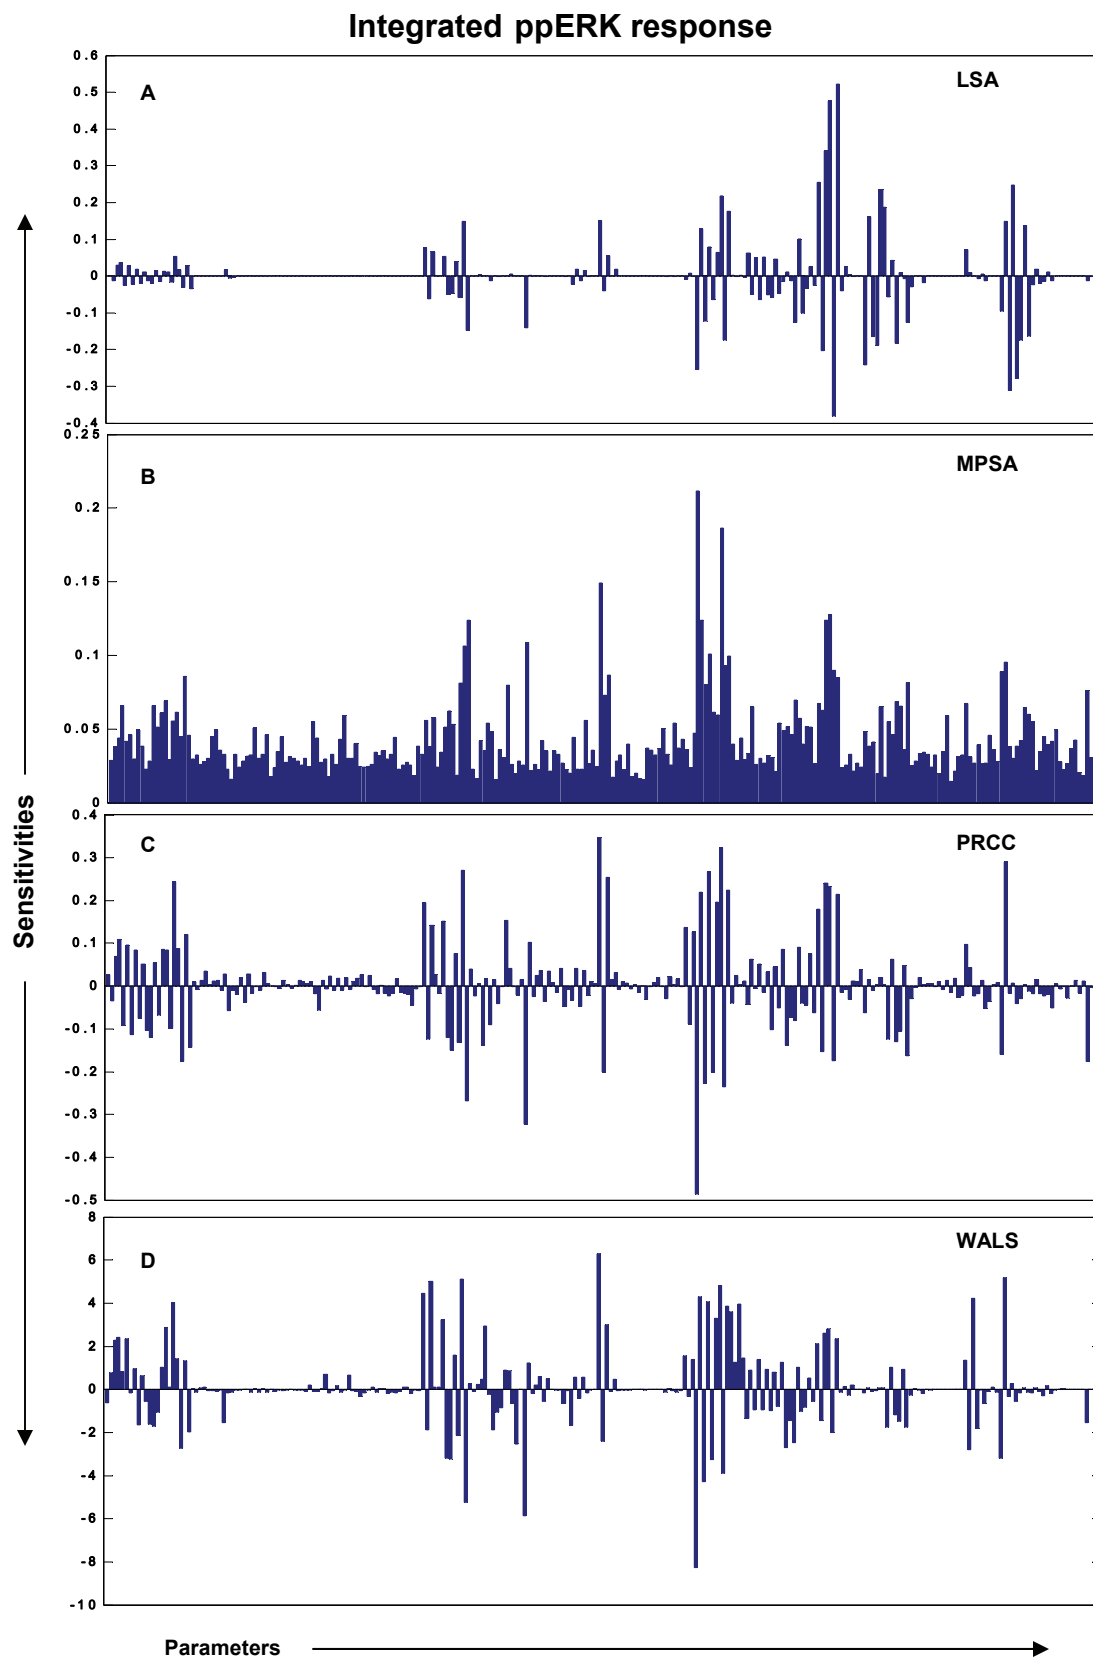

**Figure S1. 3:** Sensitivities of Integrated response of ppERK to Parameters variations as measured by four different methods of local and global sensitivity analysis. (A) Local Sensitivity Analysis (LSA) (B) Multi Parametric Sensitivity Analysis (MPSA) (C) Partial Rank Correlation Coefficient (PRCC), and (D) Weighted Average of Local Sensitivities (WALS) In all cases parameters location on the X-axis is in the order of their serial nos.

### Integrated and Maximum ppERK response

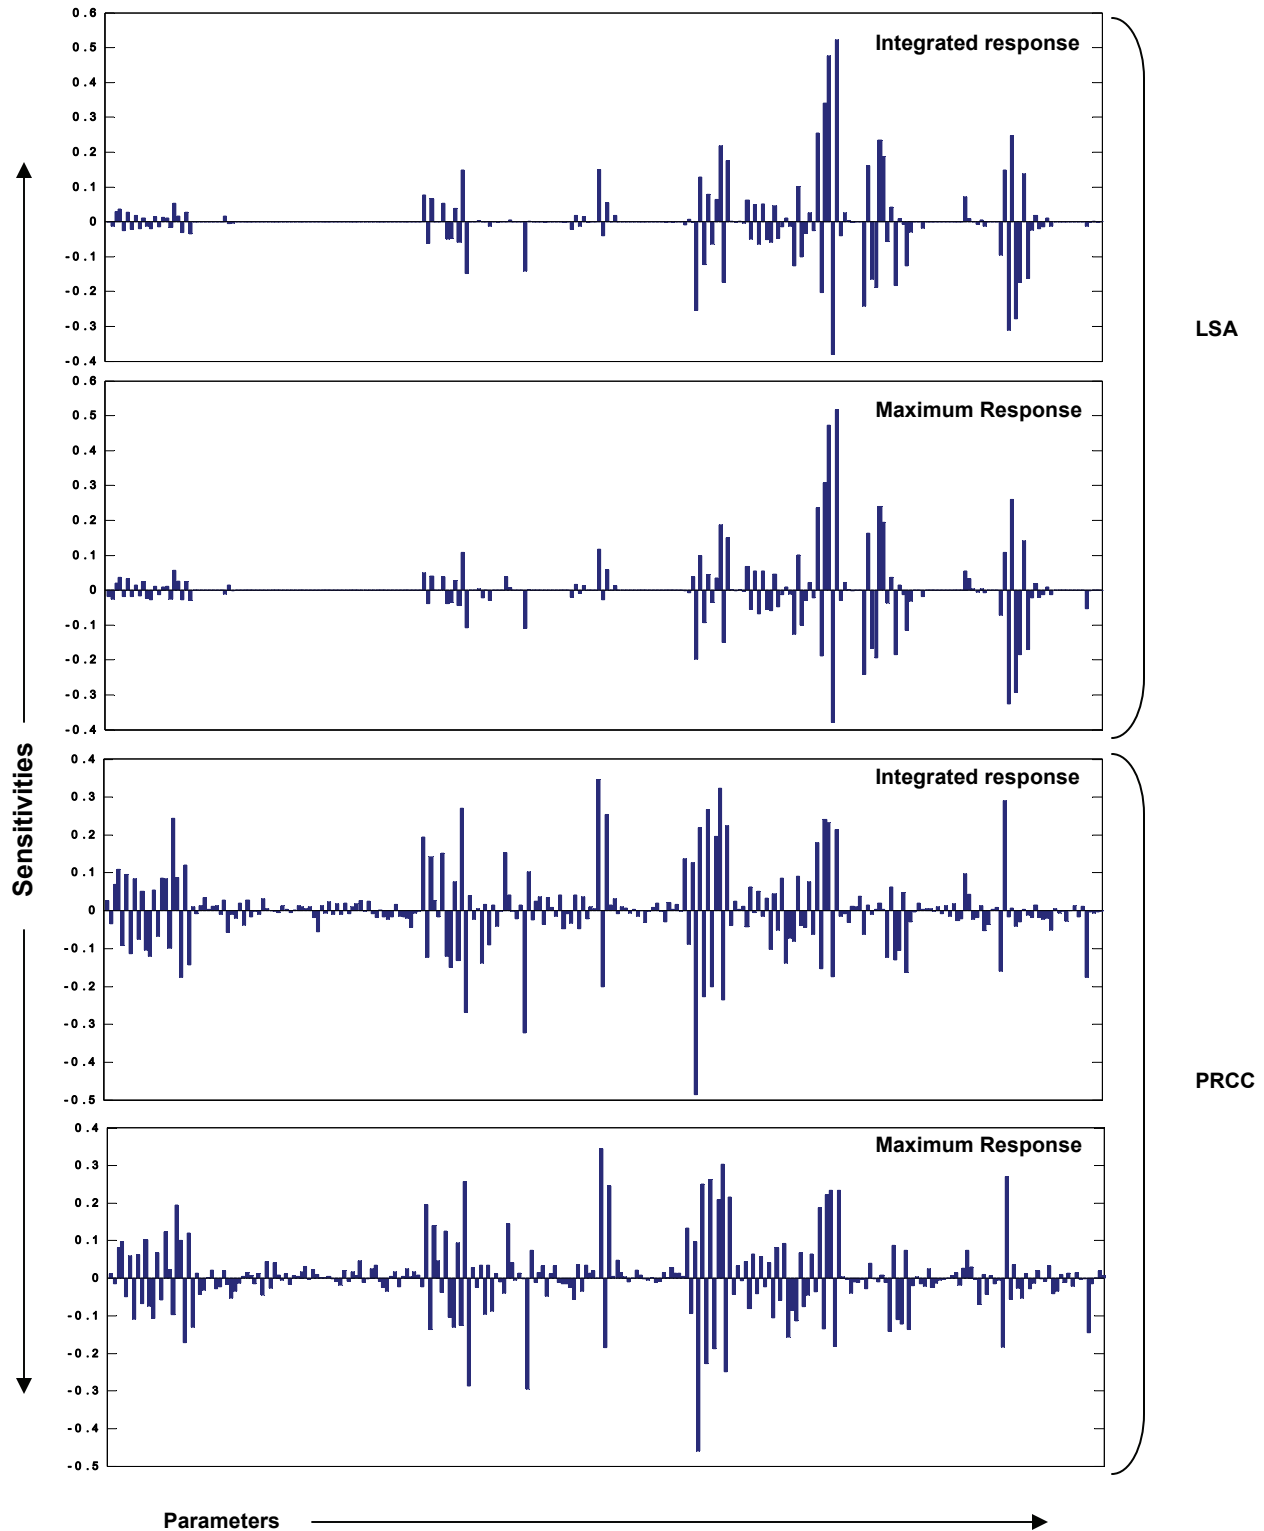

**Figure S1. 4:** Comparison of sensitivities of integrated response and sensitivities of maximum response of ppERK to Parameter variations as measured by local and global sensitivity analysis. Fully Normalized Sensitivities from Local Sensitivity Analysis (LSA) and Global Sensitivity Analysis by Partial Rank Correlation Coefficients (PRCC).

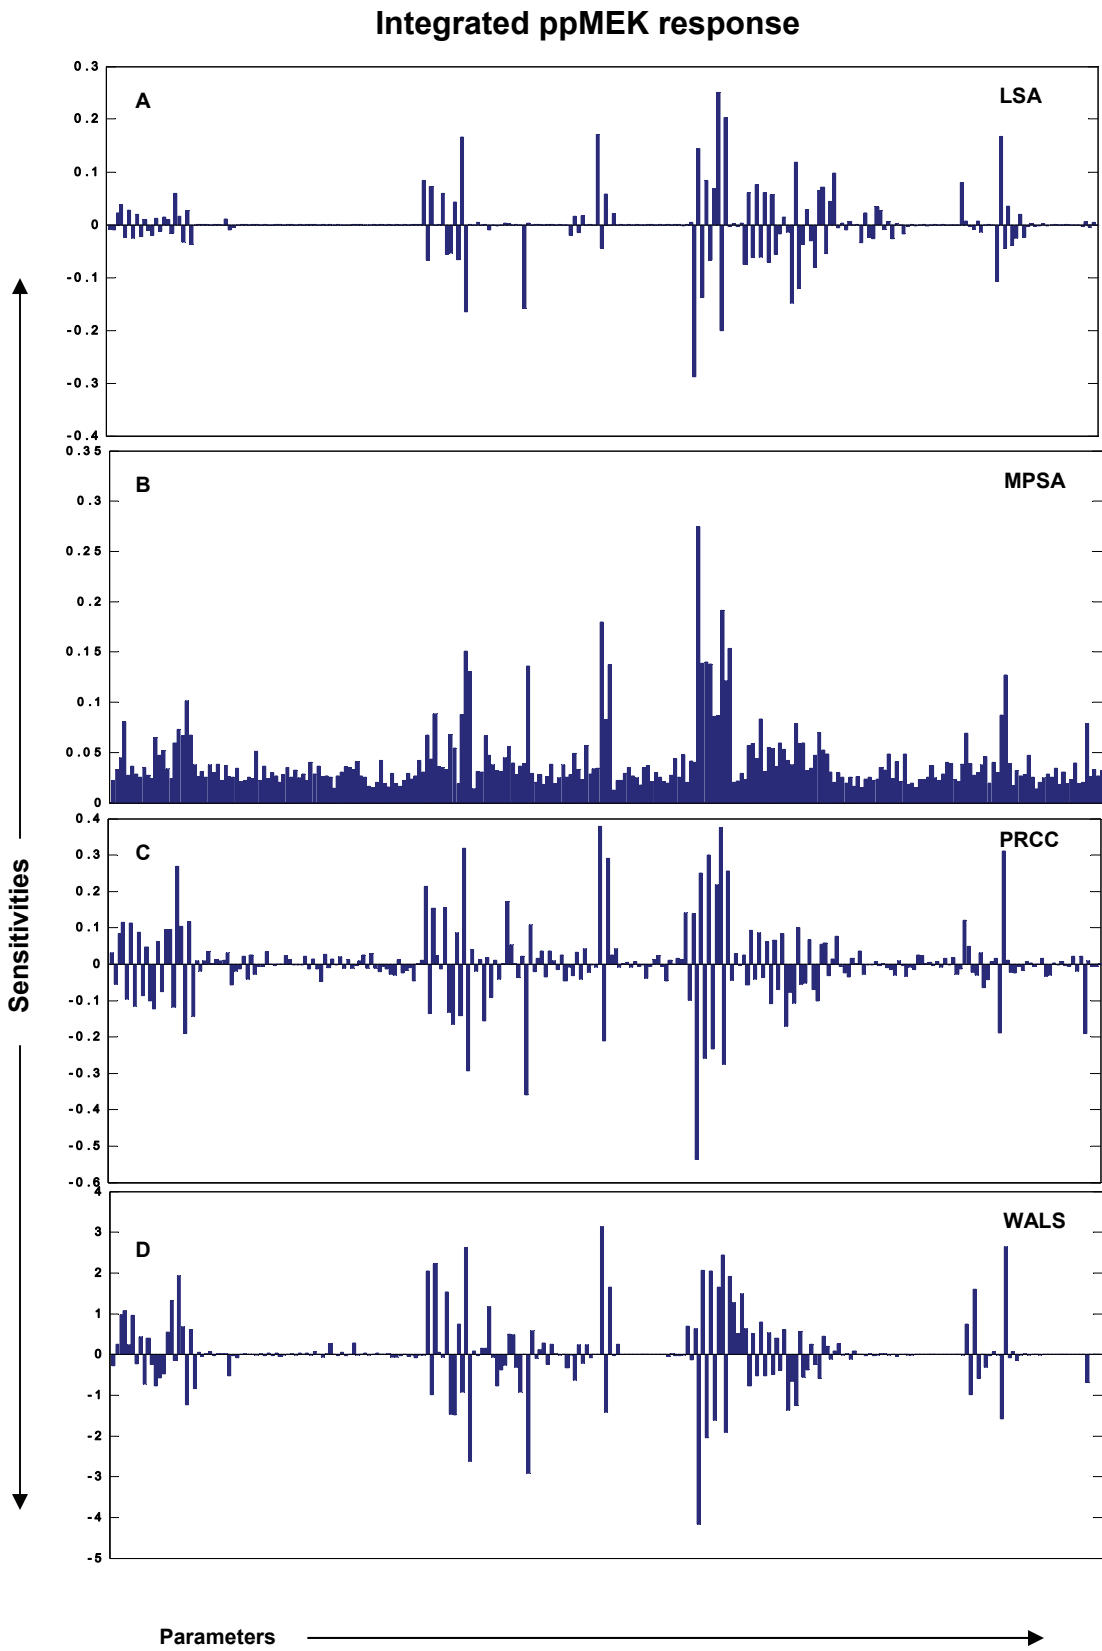

**Figure S1. 5:** Sensitivities of Integrated response of ppMEK to Parameter variations as measured by four different methods of local and global sensitivity analysis. (A) Local Sensitivity Analysis (LSA) (B) Multi Parametric Sensitivity Analysis (MPSA) (C) Partial Rank Correlation Coefficient (PRCC), and (D) Weighted Average of Local Sensitivities (WALS)

## Integrated and Maximum ppMEK response

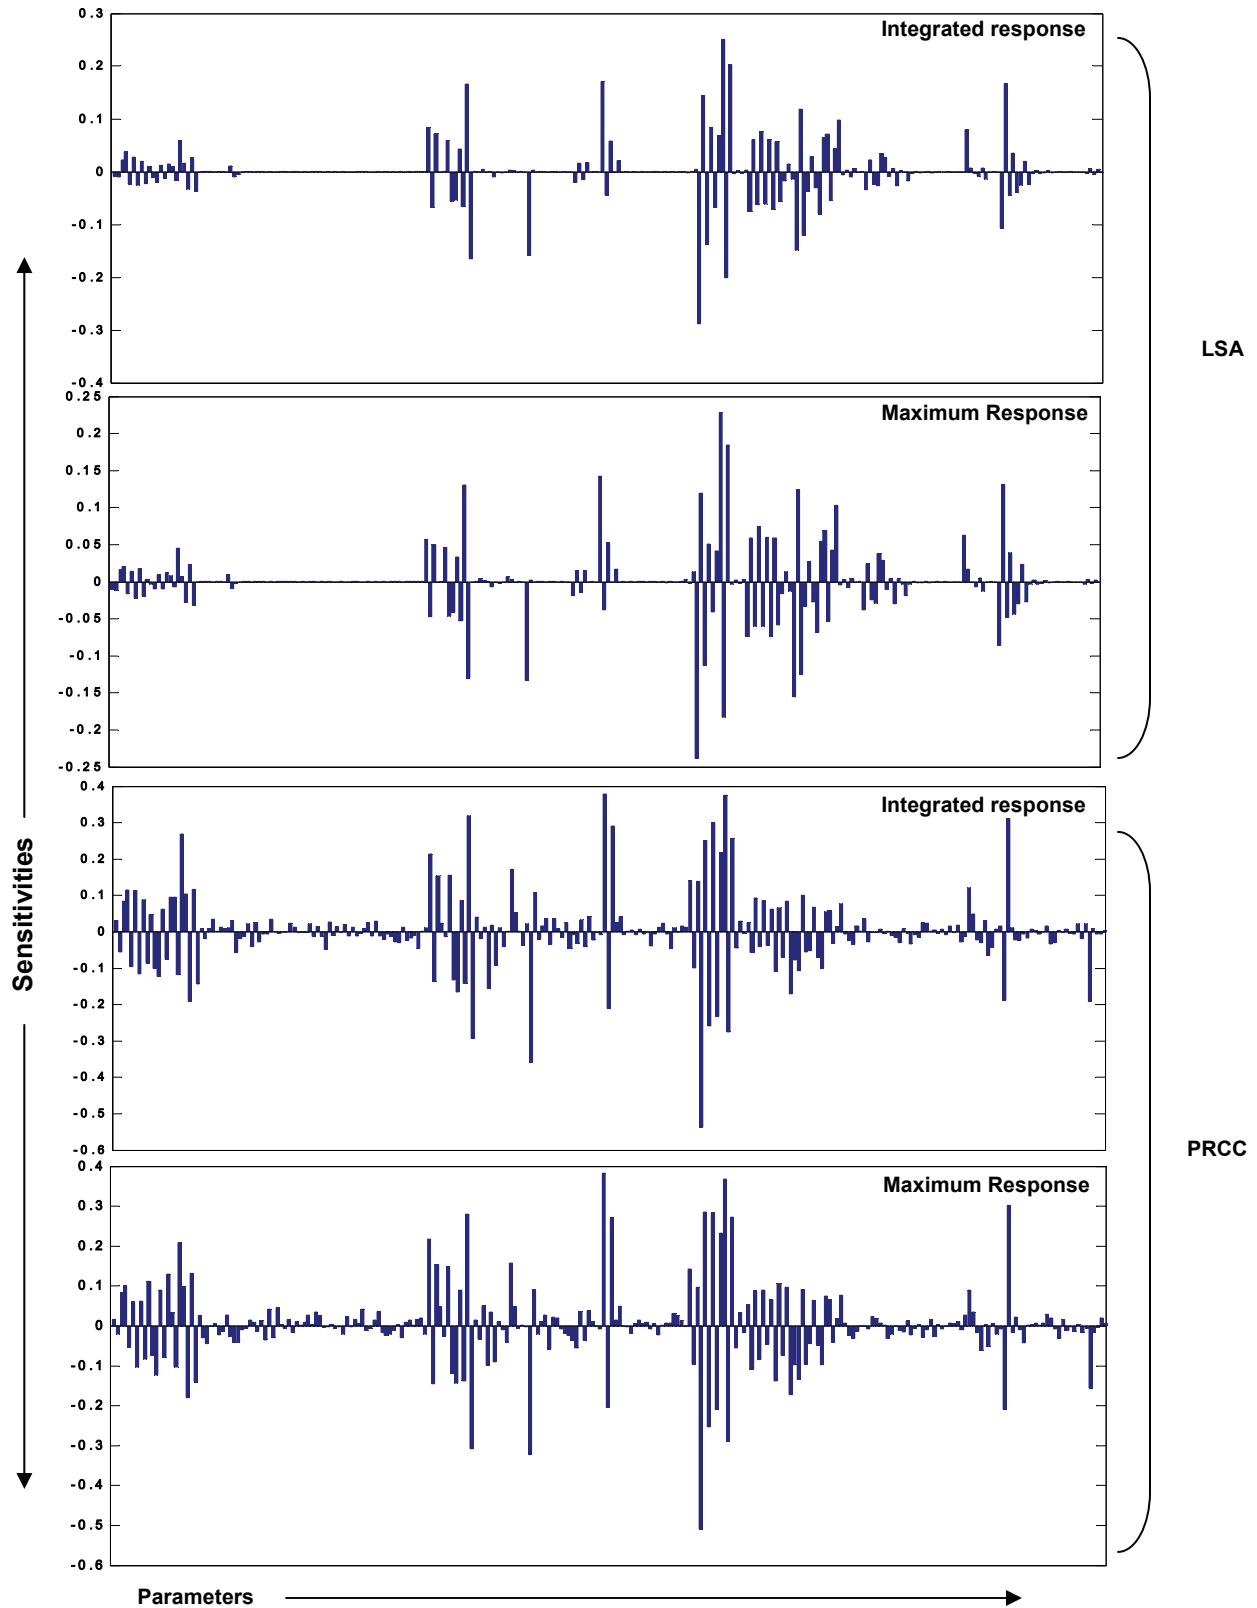

**Figure S1. 6:** Comparison of sensitivities of integrated response and sensitivities of maximum response of ppMEK to Parameter variations as measured by local and global sensitivity analysis. Fully normalized sensitivities from Local Sensitivity Analysis (LSA) and Global Sensitivity Analysis by Partial Rank Correlation Coefficients (PRCC) .

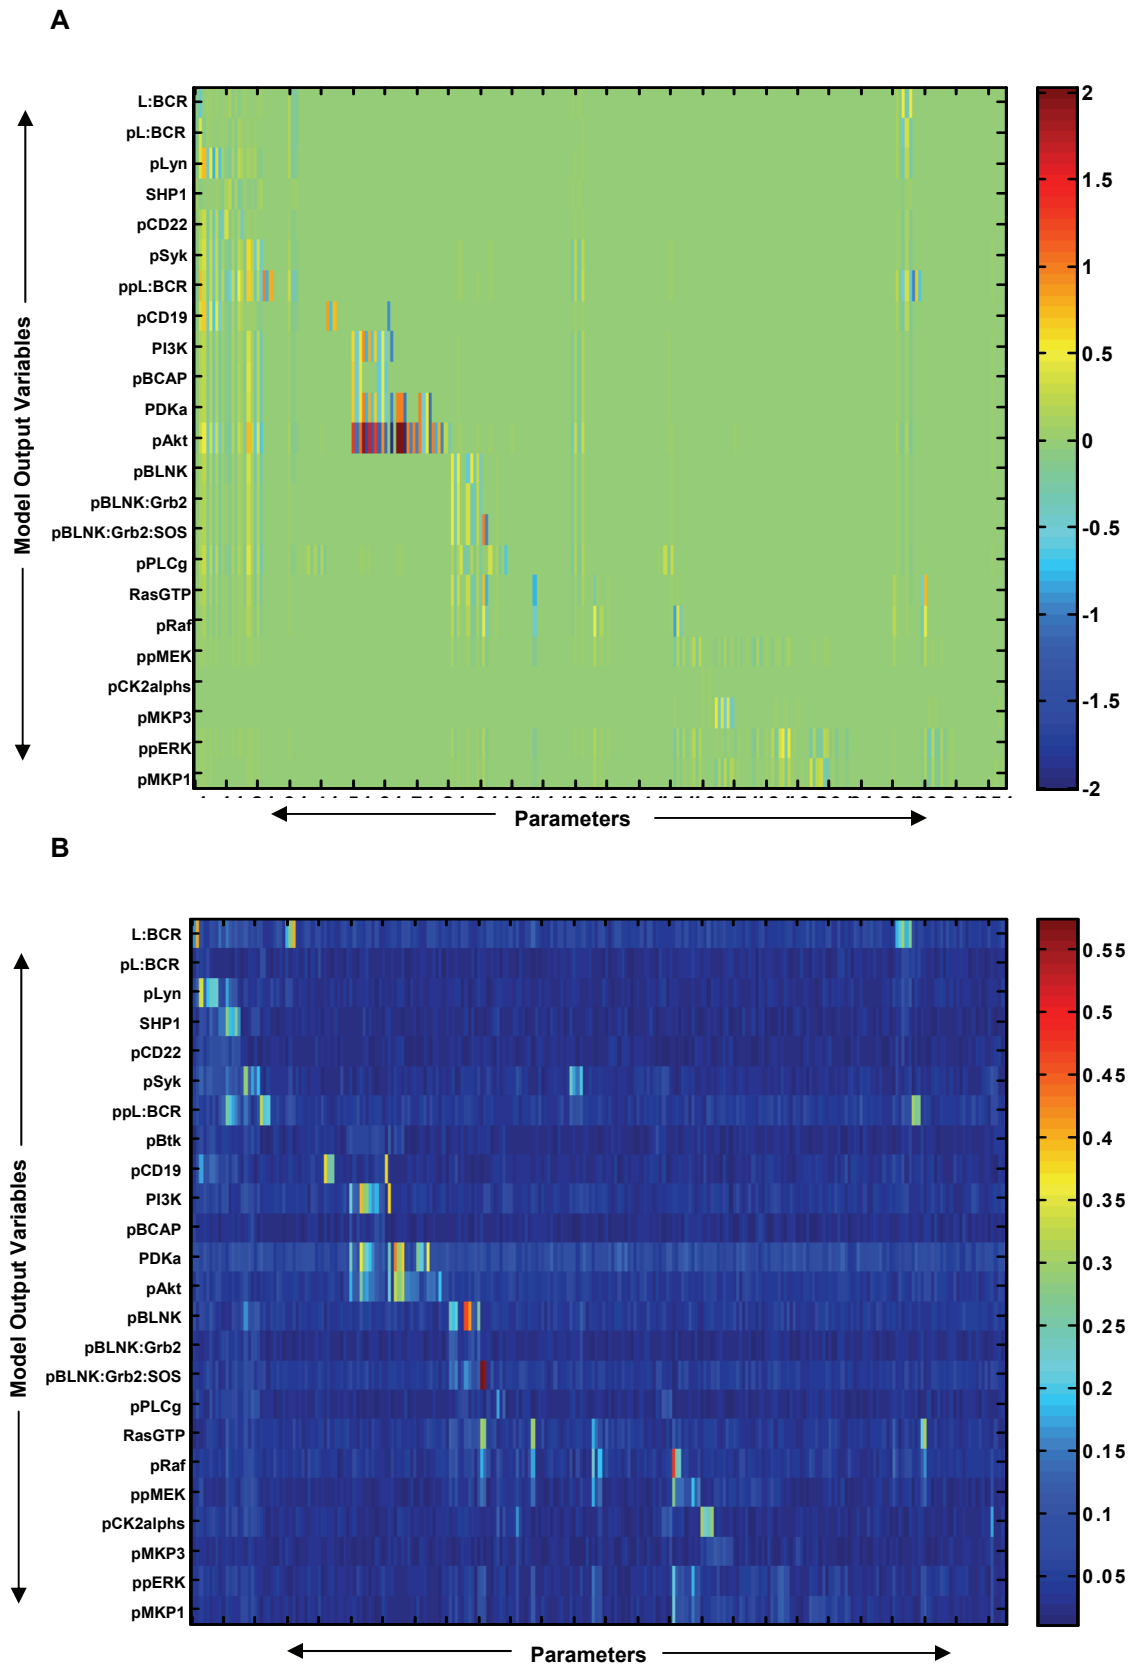

**Figure S1. 7:** Comparison of sensitivities of integrated response of different model output variables for Parameter variations as measured by local and global sensitivity analysis. (A) Local Sensitivity Analysis (LSA) and (B) Global Sensitivity Analysis by Multi-Parametric Sensitivity analysis .

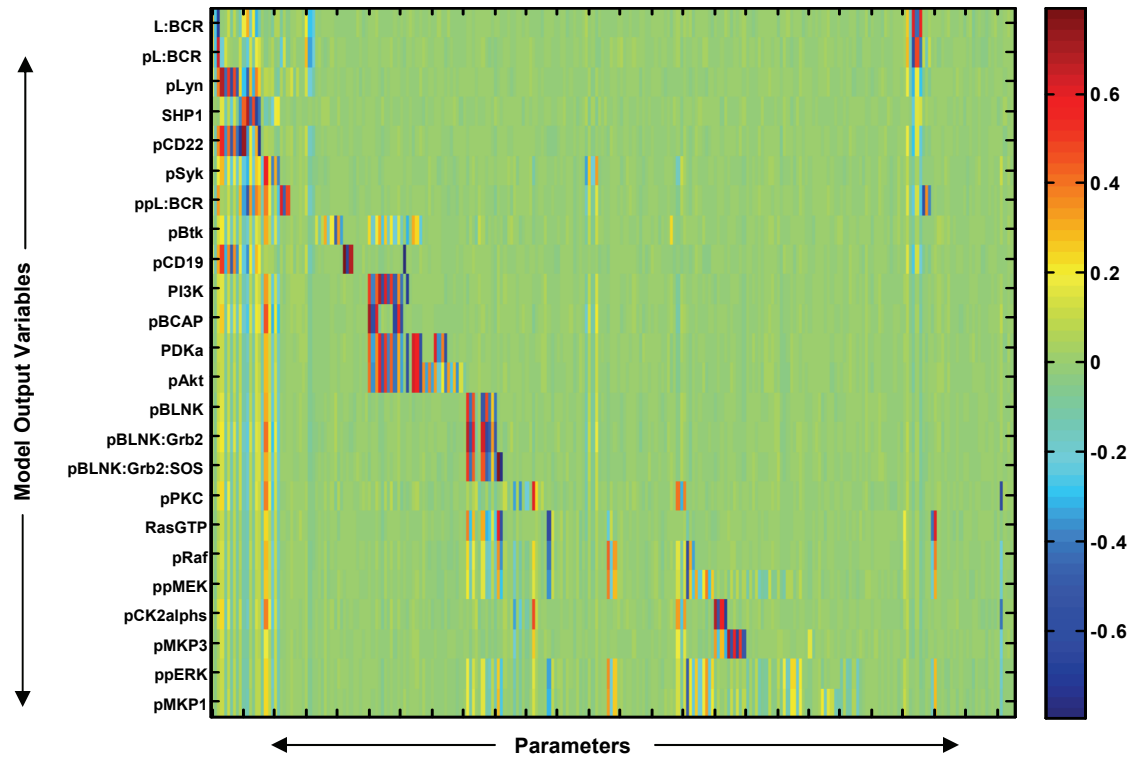

**Figure S1. 8:** Sensitivities of integrated response of different model output variables for Parameter variations as measured by global sensitivity analysis by Partial Rank Correlation Coefficients (PRCC) Method .



**Table S1.1: List of Sensitive parameters for ppERK response, identified by multiple sensitive analysis methods.** (Highlighted values are chosen by low cut-off of the scores in each method. Both negative and positive values are selected in cases wherever required)

| Parameter no. | Name     | Scope (Reaction)                          | Value    | INTEGRATED RESPONSE ppERK |          |          |          | MAXIMUM RESPONSE ppERK |          |
|---------------|----------|-------------------------------------------|----------|---------------------------|----------|----------|----------|------------------------|----------|
|               |          |                                           |          | LSA                       | MPSA     | PRCC     | WALS     | LSA                    | PRCC     |
| 3             | kf_2     | [L:BCR] -> [L:BCRp]                       | 0.99     | 0.029204                  | 0.043819 | 0.070292 | 2.2845   | 0.020365               | 0.081712 |
| 4             | kon_3    | [L:BCRp] + Lyn <-> [L:BCRp:Lyn]           | 0.8857   | 0.037552                  | 0.065934 | 0.10865  | 2.4007   | 0.037694               | 0.097706 |
| 6             | kcat_4   | [L:BCRp:Lyn] -> [L:BCRp] + Lynp           | 0.515    | 0.028499                  | 0.046031 | 0.096054 | 2.3485   | 0.032711               | 0.058961 |
| 7             | kon_5    | Lynp + SHP1 <-> [Lynp:SHP1]               | 7        | -0.02222                  | 0.029844 | -0.11401 | -0.15307 | -0.01859               | -0.10919 |
| 8             | koff_5   | Lynp + SHP1 <-> [Lynp:SHP1]               | 7.9716   | 0.017748                  | 0.049554 | 0.084544 | 0.96652  | 0.01486                | 0.063383 |
| 9             | kcat_6   | [Lynp:SHP1] -> Lyn + SHP1                 | 2        | -0.01922                  | 0.038369 | -0.07513 | -1.6353  | -0.01607               | -0.06662 |
| 10            | km_7     | Lynp + CD22 -> Lynp + CD22p               | 1.933    | 0.01182                   | 0.02282  | 0.05168  | 0.61933  | 0.02376                | 0.10261  |
| 11            | vm_7     | Lynp + CD22 -> Lynp + CD22p               | 5.4291   | -0.01237                  | 0.028449 | -0.10304 | -0.54861 | -0.02388               | -0.0735  |
| 12            | kf_8     | CD22p + SHP1c <-> [CD22p:SHP1c]           | 0.7532   | -0.01929                  | 0.066175 | -0.12033 | -1.611   | -0.02785               | -0.10627 |
| 13            | kb_8     | CD22p + SHP1c <-> [CD22p:SHP1c]           | 1.201    | 0.014022                  | 0.051081 | 0.054348 | -1.7142  | 0.012024               | 0.068158 |
| 14            | kcat_9   | [CD22p:SHP1c] -> CD22p + SHP1             | 0.9426   | -0.01476                  | 0.060674 | -0.06679 | -1.0386  | -0.01242               | -0.05681 |
| 15            | kf_10    | SHP1 -> SHP1c                             | 0.01     | 0.012677                  | 0.069115 | 0.086093 | 1.0282   | 0.010086               | 0.12424  |
| 16            | kf_11    | CD22p -> CD22                             | 0.0943   | 0.011214                  | 0.02936  | 0.08423  | 2.8871   | 0.010491               | 0.023539 |
| 18            | kf_12    | Lynp + Syk <-> [Lynp:Syk]                 | 0.448    | 0.053245                  | 0.061226 | 0.24421  | 4.0278   | 0.057128               | 0.19438  |
| 19            | kcat_13  | [Lynp:Syk] -> Lynp + Syk                  | 21.56515 | 0.016662                  | 0.044864 | 0.0879   | 1.4256   | 0.026035               | 0.10032  |
| 20            | kf_14    | Sykp + SHP1 <-> [Sykp:SHP1]               | 20       | -0.03165                  | 0.085495 | -0.17647 | -2.7199  | -0.02746               | -0.17125 |
| 21            | kb_14    | Sykp + SHP1 <-> [Sykp:SHP1]               | 3.6      | 0.02689                   | 0.045941 | 0.12013  | 1.31     | 0.023202               | 0.12074  |
| 31            | kon_22   | 2 [L:BCR1] <-> [L:BCR]                    | 10       | 0.016718                  | 0.022684 | 0.027805 | -1.5481  | -0.01006               | -0.01625 |
| 82            | kf_55    | Sykp + BLNK <-> [Sykp:BLNK]               | 2.4      | 0.07698                   | 0.055654 | 0.19513  | 4.4512   | 0.05042                | 0.19611  |
| 83            | kb_55    | Sykp + BLNK <-> [Sykp:BLNK]               | 4        | -0.06144                  | 0.038016 | -0.1235  | -1.8585  | -0.03912               | -0.13691 |
| 84            | kcat_56  | [Sykp:BLNK] -> Sykp + BLNKp               | 1        | 0.065816                  | 0.057549 | 0.14234  | 5.0224   | 0.041205               | 0.14063  |
| 87            | kf_58    | BLNKp + Grb2 <-> [BLNKp:Grb2]             | 1        | 0.053132                  | 0.051447 | 0.15254  | 3.236    | 0.037963               | 0.12557  |
| 88            | kb_58    | BLNKp + Grb2 <-> [BLNKp:Grb2]             | 0.05     | -0.0494                   | 0.062139 | -0.11943 | -3.2013  | -0.03794               | -0.10347 |
| 89            | kf_59    | BLNKp + Pase2 <-> [BLNKp:Pase2]           | 222      | -0.04783                  | 0.053274 | -0.14956 | -3.2291  | -0.03444               | -0.13002 |
| 90            | kb_59    | BLNKp + Pase2 <-> [BLNKp:Pase2]           | 3.68     | 0.038179                  | 0.018583 | 0.075944 | 1.5954   | 0.027512               | 0.094075 |
| 91            | kcat_60  | [BLNKp:Pase2] -> BLNK + Pase2             | 0.926    | -0.0586                   | 0.081336 | -0.13187 | -2.1264  | -0.04382               | -0.12428 |
| 92            | kf_61    | [BLNKp:Grb2] + SoS <-> [BLNKp:Grb2:SoS]   | 0.05     | 0.14803                   | 0.10632  | 0.27137  | 5.1205   | 0.10744                | 0.25726  |
| 93            | kb_61    | [BLNKp:Grb2] + SoS <-> [BLNKp:Grb2:SoS]   | 1        | -0.14749                  | 0.12379  | -0.26859 | -5.224   | -0.10744               | -0.28619 |
| 97            | kf_64    | PLCgp + Pase3 <-> [PLCgp:Pase3]           | 52       | 5.99E-05                  | 0.035205 | -0.13772 | 0.46904  | -0.02243               | -0.09551 |
| 98            | kb_64    | PLCgp + Pase3 <-> [PLCgp:Pase3]           | 0.54     | 0.000371                  | 0.05392  | 0.016948 | 2.9354   | 0.000139               | 0.034664 |
| 108           | kf_71    | RasGTP -> RasGDP                          | 0.25     | -0.14                     | 0.10863  | -0.32322 | -5.8548  | -0.10986               | -0.29429 |
| 109           | kf_72    | GEFp + RasGDP <-> [GEFp:RasGDP]           | 0.08     | 0.002824                  | 0.021912 | 0.10295  | 1.2201   | 0.001874               | 0.075113 |
| 120           | kf_80    | PKCm + Sykp <-> [PKCm:Sykp]               | 0.25     | -0.02158                  | 0.044368 | -0.03314 | -1.6908  | -0.01976               | -0.05608 |
| 127           | kf_85    | Raf + RasGTP <-> [Raf:RasGTP]             | 100      | 0.15104                   | 0.14929  | 0.34641  | 6.2859   | 0.11765                | 0.34396  |
| 128           | kb_85    | Raf + RasGTP <-> [Raf:RasGTP]             | 2        | -0.03933                  | 0.072863 | -0.20153 | -2.3882  | -0.02812               | -0.1836  |
| 129           | kf_86    | [Raf:RasGTP] + PKCm <-> [Raf:RasGTP:PKCm] | 8        | 0.054611                  | 0.086794 | 0.25403  | 3.0138   | 0.059179               | 0.24523  |
| 149           | kf_99    | Sykp + PLCg <-> [Sykp:PLCg]               | 10       | -0.00864                  | 0.036119 | 0.13652  | 1.5703   | -0.00194               | 0.13414  |
| 151           | kcat_100 | [Sykp:PLCg] -> Sykp + PLCgp               | 4        | -0.00205                  | 0.047205 | 0.12754  | 1.3759   | 0.03828                | 0.098158 |
| 152           | kf_101   | Rafp + PP1 <-> [Rafp:PP1]                 | 3        | -0.2553                   | 0.21149  | -0.48536 | -8.2838  | -0.1968                | -0.45958 |
| 153           | kb_101   | Rafp + PP1 <-> [Rafp:PP1]                 | 4        | 0.12761                   | 0.12365  | 0.21967  | 4.2975   | 0.098391               | 0.25047  |
| 154           | kcat_102 | [Rafp:PP1] -> Raf + PP1                   | 4        | -0.12192                  | 0.080181 | -0.22685 | -4.2892  | -0.09364               | -0.22694 |
| 155           | kf_103   | Rafp + MEK <-> [Rafp:MEK]                 | 6.8      | 0.078856                  | 0.10069  | 0.26756  | 4.0473   | 0.044245               | 0.26303  |
| 156           | kb_103   | Rafp + MEK <-> [Rafp:MEK]                 | 9.62     | -0.06309                  | 0.061531 | -0.2007  | -3.2638  | -0.0354                | -0.18786 |
| 157           | kcat_104 | [Rafp:MEK] -> Rafp + MEKp                 | 2.405    | 0.063937                  | 0.059647 | 0.19725  | 3.2865   | 0.035856               | 0.20891  |
| 158           | kf_105   | Rafp + MEKp <-> [Rafp:MEKp]               | 6.8      | 0.21811                   | 0.18623  | 0.32331  | 4.805    | 0.18673                | 0.30276  |
| 159           | kb_105   | Rafp + MEKp <-> [Rafp:MEKp]               | 9.62     | -0.17448                  | 0.093219 | -0.23512 | -3.8752  | -0.14939               | -0.24828 |
| 160           | kcat_106 | [Rafp:MEKp] -> Rafp + MEKpp               | 2.405    | 0.17634                   | 0.099473 | 0.22414  | 3.8703   | 0.15091                | 0.21605  |

|     |          |                                                           |          |          |          |          |          |          |          |
|-----|----------|-----------------------------------------------------------|----------|----------|----------|----------|----------|----------|----------|
| 161 | kf_107   | PKCm + CK2alpha <-> [PKCm:CK2alpha]                       | 2        | 0.00215  | 0.039536 | -0.03877 | 3.6096   | 0.002523 | -0.04317 |
| 162 | kb_107   | PKCm + CK2alpha <-> [PKCm:CK2alpha]                       | 8        | -0.00161 | 0.028508 | 0.024229 | 1.2526   | -0.00189 | 0.032473 |
| 163 | kcat_108 | [PKCm:CK2alpha] -> PKCm + CK2alphap                       | 2.667    | 0.001957 | 0.043663 | 0.003555 | 3.9474   | 0.002263 | -0.00634 |
| 164 | kf_109   | CK2alphap -> CK2alpha                                     | 0.333    | -0.00263 | 0.029098 | 0.01183  | 1.4589   | -0.00289 | 0.044563 |
| 165 | kf_110   | CK2alphap + MKP3 <-> [CK2alphap:MKP3]                     | 1        | 0.062408 | 0.033284 | -0.04216 | -1.3307  | 0.067634 | -0.07989 |
| 167 | kcat_111 | [CK2alphap:MKP3] -> CK2alphap + MKP3p                     | 1.16     | 0.050177 | 0.026022 | -0.00492 | -0.94637 | 0.054468 | -0.04071 |
| 168 | kf_112   | MKP3p + PP2A <-> [MKP3p:PP2A]                             | 15       | -0.06344 | 0.030185 | 0.051785 | 1.399    | -0.06806 | 0.058377 |
| 169 | kb_112   | MKP3p + PP2A <-> [MKP3p:PP2A]                             | 16       | 0.050754 | 0.026687 | -0.01522 | -0.95654 | 0.054448 | -0.02305 |
| 171 | kf_114   | MEKpp + PP2A <-> [MEKpp:PP2A]                             | 1.31     | -0.05791 | 0.03069  | -0.10188 | -0.97887 | -0.05763 | -0.10585 |
| 174 | kf_116   | MEKp + PP2A <-> [MEKp:PP2A]                               | 1.31     | -0.01488 | 0.049138 | 0.085984 | 1.254    | -0.01278 | 0.092898 |
| 175 | kb_116   | MEKp + PP2A <-> [MEKp:PP2A]                               | 4        | 0.0119   | 0.051496 | -0.13872 | -2.6973  | 0.010226 | -0.15639 |
| 176 | kcat_117 | [MEKp:PP2A] -> MEK + PP2A                                 | 1        | -0.0121  | 0.046098 | -0.07203 | -1.4551  | -0.01047 | -0.08579 |
| 177 | kf_118   | MEKpp + MKP3p <-> [MEKpp:MKP3p]                           | 26       | -0.12597 | 0.069778 | -0.08032 | -2.4753  | -0.12682 | -0.11419 |
| 178 | kb_118   | MEKpp + MKP3p <-> [MEKpp:MKP3p]                           | 64       | 0.10078  | 0.057211 | 0.090769 | 1.0251   | 0.10146  | 0.06711  |
| 179 | kcat_119 | [MEKpp:MKP3p] -> MEKp + MKP3p                             | 16       | -0.10037 | 0.039735 | -0.03907 | -1.0278  | -0.10101 | -0.07616 |
| 183 | kf_122   | ERK + MEKpp <-> [ERK:MEKpp]                               | 1.6      | 0.25499  | 0.067188 | 0.17925  | 2.1096   | 0.23681  | 0.18892  |
| 184 | kb_122   | ERK + MEKpp <-> [ERK:MEKpp]                               | 1        | -0.20391 | 0.062512 | -0.1526  | -1.4375  | -0.18915 | -0.13563 |
| 185 | kcat_123 | [ERK:MEKpp] -> ERKp + MEKpp                               | 0.25     | 0.34169  | 0.12394  | 0.24024  | 2.6227   | 0.30825  | 0.22344  |
| 186 | kf_124   | ERKp + MEKpp <-> [ERKp:MEKpp]                             | 1.6      | 0.47591  | 0.12742  | 0.23206  | 2.8028   | 0.47353  | 0.23443  |
| 187 | kb_124   | ERKp + MEKpp <-> [ERKp:MEKpp]                             | 1        | -0.38052 | 0.089974 | -0.17524 | -2.0164  | -0.37883 | -0.18166 |
| 188 | kcat_125 | [ERKp:MEKpp] -> ERKpp + MEKpp                             | 0.25     | 0.52203  | 0.084564 | 0.21452  | 2.3409   | 0.51628  | 0.23496  |
| 195 | kf_130   | ERKpp + MKP1 <-> [ERKpp:MKP1]                             | 0.30101  | -0.24219 | 0.047866 | -0.06191 | -0.15167 | -0.24239 | -0.02741 |
| 196 | kb_130   | ERKpp + MKP1 <-> [ERKpp:MKP1]                             | 4.44     | 0.16201  | 0.038562 | 0.015221 | 0.074303 | 0.16317  | 0.039771 |
| 197 | kcat_131 | [ERKpp:MKP1] -> ERKpp + MKP1p                             | 2.2      | -0.16438 | 0.040929 | -0.00984 | -0.10902 | -0.16571 | -0.00138 |
| 198 | kb_132   | MKP1p + MKP3p <-> [MKP1p:MKP3p]                           | 108      | -0.18802 | 0.019547 | 0.002995 | -0.06317 | -0.19406 | -0.01    |
| 199 | kf_132   | MKP1p + MKP3p <-> [MKP1p:MKP3p]                           | 141      | 0.2349   | 0.064807 | 0.020359 | 0.065316 | 0.2409   | 0.00806  |
| 200 | kcat_133 | [MKP1p:MKP3p] -> MKP1 + MKP3p                             | 27       | 0.18783  | 0.017308 | 0.003829 | 0.055951 | 0.19385  | -0.01054 |
| 201 | kf_134   | ERKpp + MKP2 <-> [ERKpp:MKP2]                             | 76       | -0.05673 | 0.05477  | -0.12398 | -1.7391  | -0.03585 | -0.14203 |
| 202 | kb_134   | ERKpp + MKP2 <-> [ERKpp:MKP2]                             | 4        | 0.042128 | 0.045962 | 0.06242  | 1.0312   | 0.036957 | 0.088384 |
| 203 | kcat_135 | [ERKpp:MKP2] -> ERKp + MKP2                               | 1        | -0.18257 | 0.068503 | -0.12992 | -1.1808  | -0.18475 | -0.11008 |
| 204 | kf_136   | ERKp + MKP2 <-> [ERKp:MKP2]                               | 76       | 0.009324 | 0.065293 | -0.10452 | -1.4809  | 0.014826 | -0.12148 |
| 205 | kb_136   | ERKp + MKP2 <-> [ERKp:MKP2]                               | 4        | -0.00785 | 0.036169 | 0.048345 | 0.92584  | -0.0131  | 0.074341 |
| 206 | kcat_137 | [ERKp:MKP2] -> ERK + MKP2                                 | 1        | -0.12558 | 0.081798 | -0.16248 | -1.7516  | -0.11475 | -0.13575 |
| 221 | kf_148   | [Rafp:RasGTP] -> Rafp + RasGTP                            | 1        | 0.071143 | 0.06721  | 0.097229 | 1.3666   | 0.054611 | 0.074144 |
| 222 | kf_149   | [L:BCR1] + BCR <-> [L:BCR]                                | 10       | 0.008757 | 0.031247 | 0.042901 | -2.7834  | 0.033819 | 0.029415 |
| 223 | kb_149   | [L:BCR1] + BCR <-> [L:BCR]                                | 2        | 0.00016  | 0.027101 | -0.02317 | 4.2148   | 0.004053 | -0.00312 |
| 224 | kf_150   | [L:BCRp] + SHP1 <-> [L:BCRp:SHP1]                         | 83       | -0.00764 | 0.039382 | -0.01822 | -1.8154  | -0.00518 | -0.06862 |
| 230 | km_154   | [BLNKp:Grb2:SoS] + RasGTP -> [BLNKp:Grb2:SoS] + RasGDP -> | 0.050505 | -0.0953  | 0.088828 | -0.15972 | -3.1803  | -0.07055 | -0.18217 |
| 231 | vm_154   | [BLNKp:Grb2:SoS] + RasGTP                                 | 22       | 0.14926  | 0.095559 | 0.28961  | 5.1958   | 0.10841  | 0.27124  |
| 232 | kf_155   | ERKpp + MKP1p <-> [ERKpp:MKP1p]                           | 450      | -0.3104  | 0.038073 | -0.01653 | -0.3368  | -0.32582 | -0.05521 |
| 233 | kb_155   | ERKpp + MKP1p <-> [ERKpp:MKP1p]                           | 600      | 0.24832  | 0.030035 | 0.007364 | 0.28074  | 0.26066  | 0.036606 |
| 234 | kcat_156 | [ERKpp:MKP1p] -> ERKp + MKP1p                             | 150      | -0.27853 | 0.038234 | -0.04164 | -0.54174 | -0.2936  | -0.02657 |
| 235 | kf_157   | ERKp + MKP1p <-> [ERKp:MKP1p]                             | 450      | -0.17439 | 0.042172 | -0.02909 | -0.15417 | -0.18474 | -0.05329 |
| 236 | kb_157   | ERKp + MKP1p <-> [ERKp:MKP1p]                             | 600      | 0.13698  | 0.06439  | 0.002892 | 0.083899 | 0.14117  | 0.011061 |
| 237 | kcat_158 | [ERKp:MKP1p] -> ERK + MKP1p                               | 150      | -0.16366 | 0.059964 | -0.01193 | -0.12975 | -0.16943 | -0.0273  |

## Robustness of the Model:

Our present model was unique in that it also modeled active regulation by phosphatases. It included active regulation of phosphatase by the kinase components of the network, which in turn was negatively regulated by these active phosphatases. Thus it became important to test the model for its robustness to the parameter variations, at least to the extent that it compared well with existing models. Robustness is a fundamental property

of biological systems, which allows the systems to maintain its behavior against random perturbations (18,19). We preformed the Robustness analysis by SBML\_SAT (14). Robustness analysis was performed as described (20,21), and Robustness scores measured as Total Parameter Variations (TPV) by randomly generated parameters by Latin Hypercube Sampling method.

**Table S1.2: Comparison of the robustness scores of various Models of MAPK :**

| Model Name                 | Receptor/<br>Activator | RasGTP    | pMAPKKK                              | ppMAPKK   | pMAPK    | Phosphatase<br>Regulation      |
|----------------------------|------------------------|-----------|--------------------------------------|-----------|----------|--------------------------------|
| Huang Ferrell              | -0.00543320            | -----     | -0.662038                            | -0.961861 | -1.23605 | No                             |
| Kholodenko<br>2000         | -----                  | -----     | -0.537109                            | -1.00071  | -1.25602 | No                             |
| Levchenko<br>With scaffold | -----                  | -----     | -0.344902                            | -0.67925  | -1.11045 | No                             |
| Levcheno<br>No Scaffold    | -----                  | -----     | -0.561329                            | -1.3463   | -2.80383 | No                             |
| Hatakeyama<br>2003         | -0.58779               | -1.53691  | -1.59975                             | -1.78692  | -3.52799 | Phosphatases<br>Buffered       |
| Sasagawa                   | -0.472733              | -0.79791  | -0.875844 (cRaf)<br>-0.980000 (BRaf) | -1.2053   | -1.99484 | Phosphatases<br>Buffered       |
| Bhalla 2002                | -1.44197e-034          | -0.158336 | -0.88649                             | -3.01403  | -5.13613 | MKP1 Regulation<br>by MAPK     |
| <b>Present Study</b>       | -0.386837              | -0.980019 | -1.34911                             | -2.27352  | -4.98263 | Active phosphatase<br>cascade. |

The R scores (Robustness scores) of a biological model assumes a negative value and the closer this value is to zero, the more robust the model. Here we compared some of the models for the MAPK pathways in the literature with our present model. The corresponding R scores of MAPK components of those models, calculated under identical conditions of perturbations, are

given in Table S1.2. As is evident here, the robustness score of our model compares well with that of the others, particularly with those that take phosphatases into consideration. Our model shows a particularly good agreement with that of *Bhalla et.al.* (2002); the only other model that incorporates active regulation of the phosphatase MKP1.

## References:

1. Rolli, V., Gallwitz, M., Wossning, T., Flemming, A., Schamel, W. W., Zurn, C., and Reth, M. (2002) *Mol Cell* **10**(5), 1057-1069
2. Hou, P., Araujo, E., Zhao, T., Zhang, M., Massenbunrg, D., Veselits, M., Doyle, C., Dinner, A. R., and Clark, M. R. (2006) *PLoS Biol* **4**(7), e200
3. Kurosaki, T. (1999) *Annu Rev Immunol* **17**, 555-592
4. Jumaa, H., Hendriks, R. W., and Reth, M. (2005) *Annu Rev Immunol* **23**, 415-445
5. Bhalla, U. S., and Iyengar, R. (1999) *Science* **283**(5400), 381-387
6. Bhalla, U. S., Ram, P. T., and Iyengar, R. (2002) *Science* **297**(5583), 1018-1023
7. Oh-hora, M., Johmura, S., Hashimoto, A., Hikida, M., and Kurosaki, T. (2003) *J Exp Med* **198**(12), 1841-1851
8. Coughlin, J. J., Stang, S. L., Dower, N. A., and Stone, J. C. (2005) *J Immunol* **175**(11), 7179-7184
9. Ueki, K., Matsuda, S., Tobe, K., Gotoh, Y., Tamemoto, H., Yachi, M., Akanuma, Y., Yazaki, Y., Nishida, E., and Kadowaki, T. (1994) *J Biol Chem* **269**(22), 15756-15761
10. Hatakeyama, M., Kimura, S., Naka, T., Kawasaki, T., Yumoto, N., Ichikawa, M., Kim, J. H., Saito, K., Saeki, M., Shirouzu, M., Yokoyama, S., and Konagaya, A. (2003) *Biochem J* **373**(Pt 2), 451-463
11. Kumar, D., Dua, R., Srikanth, R., Jayaswal, S., Siddiqui, Z., and Rao, K. V. (2008) *BMC Res Notes* **1**(1), 81
12. Castelli, M., Camps, M., Gillieron, C., Leroy, D., Arkinstall, S., Rommel, C., and Nichols, A. (2004) *J Biol Chem* **279**(43), 44731-44739
13. Kolch, W. (2000) *Biochem J* **351 Pt 2**, 289-305
14. Zi, Z., Zheng, Y., Rundell, A., and Klipp, E. (2008) *BMC Bioinformatics* **9**(1), 342
15. Pappu, R., Cheng, A. M., Li, B., Gong, Q., Chiu, C., Griffin, N., White, M., Sleckman, B. P., and Chan, A. C. (1999) *Science* **286**(5446), 1949-1954
16. Ishiai, M., Kurosaki, M., Pappu, R., Okawa, K., Ronko, I., Fu, C., Shibata, M., Iwamatsu, A., Chan, A. C., and Kurosaki, T. (1999) **10**(1), 117-125
17. Ishiai, M., Kurosaki, M., Inabe, K., Chan, A. C., Sugamura, K., and Kurosaki, T. (2000) *J Exp Med* **192**(6), 847-856

18. Stelling, J., Sauer, U., Szallasi, Z., Doyle, F. J., 3rd, and Doyle, J. (2004) *Cell* **118**(6), 675-685
19. Kitano, H. (2007) *Mol Syst Biol* **3**, 137
20. Barkai, N., and Leibler, S. (1997) *Nature* **387**(6636), 913-917
21. Bluthgen, N., and Herzog, H. (2003) *J Theor Biol* **225**(3), 293-300

**Model details:**

- 1 Abbreviations and Initial Conditions**
- 2 Rate Constants and Parameters and Sensitivities of Parameters**
- 3 Reactions and Reactions Rate Equations**
- 4 Parameter Sensitivities for ppMEK response**
- 5 Parameter Sensitivities for ppERK response**

# S1. MODEL DETAILS.

## 1. Abbreviations:

| Sr. No. | Abbreviations          | InitialAmount | Names                                                                                            |
|---------|------------------------|---------------|--------------------------------------------------------------------------------------------------|
| 1       | L                      | 0.25          | Ligand                                                                                           |
| 2       | BCR                    | 0.05          | B Cell Receptor                                                                                  |
| 3       | L:BCR                  | 0             | Ligand bound to receptor pair, Crosslinkin of BCR and subsequent activation of ITAM              |
| 4       | L:BCRp                 | 0             | Mono Phosphorylated Activated BCR                                                                |
| 5       | Lyn                    | 0.24          | Src Kinase Lyn                                                                                   |
| 6       | L:BCRp:Lyn             | 0             | Lyn Bound of the Monophosphorylated Receptor                                                     |
| 7       | Lynp                   | 0             | Activated Lyn                                                                                    |
| 8       | SHP1                   | 0             | Membrane localized SHP1                                                                          |
| 9       | Lynp:SHP1              | 0             | SHP1 bound to Lyn                                                                                |
| 10      | Li                     | 0             | Inactivated ligand                                                                               |
| 11      | BCRi                   | 0             | Inactivated or Internalized BCR                                                                  |
| 12      | CD22                   | 0.18          | Membrane Anchored CD22                                                                           |
| 13      | CD22p                  | 0             | CD22 activated                                                                                   |
| 14      | SHP1c                  | 0.014         | Cytosolic SHP1                                                                                   |
| 15      | CD22p:SHP1c            | 0             | Cytosolic SHP1 bound to phosphorylated CD22                                                      |
| 16      | Syk                    | 0.2           | SYK kinase                                                                                       |
| 17      | Lynp:Syk               | 0             | Activated Lyn bound to Syk                                                                       |
| 18      | Sykp                   | 0             | Activated SYK                                                                                    |
| 19      | Sykp:SHP1              | 0             | Activated Syk bound to SHP1                                                                      |
| 20      | L:BCRp:Sykp            | 0             | SYK kinase bound to Mono phosphorylated ITAM of ligand activated BCR                             |
| 21      | L:BCRpp                | 0             | Completely activated BCR, ITAM's Phosphorylated at multiple sites                                |
| 22      | L:BCRpp:Lyn            | 0             | Completely activated BCR bound to the Lyn                                                        |
| 23      | BCRpro                 | 0.05          | BCR precursor                                                                                    |
| 24      | L:BCR1                 | 0             | Ligand bound to receptor as non crosslinked form; Single BCR bound to single molecule of antigen |
| 25      | Btk                    | 0             | Bruton's Tyrosine Kinase                                                                         |
| 26      | Btk:Lynp               | 0             | Bruton's Tyrosine Kinase (Btk)bound to activated Lyn                                             |
| 27      | Btkp                   | 0             | Activated Btk                                                                                    |
| 28      | Btk:Sykp               | 0             | Btk bound to activated Syk                                                                       |
| 29      | BtkPase                | 0.04          | Btk phosphatase                                                                                  |
| 30      | Btkp:BtkPase           | 0             | Btk bound of Btk phosphatase                                                                     |
| 31      | CD19                   | 0.12          | Membrane bound CD19                                                                              |
| 32      | Lynp:CD19              | 0             | Activated Lynp bound to CD19                                                                     |
| 33      | CD19p                  | 0             | Activated CD19                                                                                   |
| 34      | p85PI3K                | 0.134         | p85 subunit of Phosphoinositol-3 kinase                                                          |
| 35      | CD19p:p85PI3K          | 0             | CD19p bound to p85subunit of PI3K                                                                |
| 36      | p110PI3K               | 0.134         | p110 subunit of Phosphoinositol-3 kinase                                                         |
| 37      | PI3K                   | 0             | Complete holoenzyme PI3K                                                                         |
| 38      | CD19p:p85PI3K:p110PI3K | 0             | CD19p bound to p85subunit and p110subunit of PI3K                                                |
| 39      | BCAP                   | 0.2           | Membrane anchored B cell adopter protein for PI3K signaling                                      |
| 40      | Sykp:BCAP              | 0             | Sykp bound to BCAP                                                                               |
| 41      | BCAPp                  | 0             | Phosphorylated BCAP                                                                              |
| 42      | BCAPp:p85PI3K          | 0             | Phosphorylated BCAP bound to p85 subunit of PI3K                                                 |

|    |                        |        |                                                           |
|----|------------------------|--------|-----------------------------------------------------------|
| 43 | BCAPp:p85PI3K:p110PI3K | 0      | Phosphorylated BCAP bound to p85 and p110 subunit of PI3K |
| 44 | Pase1                  | 0.02   | Phosphatase for BCAP                                      |
| 45 | BCAPp:Pase1            | 0      | Phosphatase for BCAP bound to BCAPp                       |
| 46 | PIP2                   | 10     | PIP2                                                      |
| 47 | PIP3                   | 0      | PIP3                                                      |
| 48 | Aktc                   | 0.0058 | Cytosolic Akt                                             |
| 49 | Aktm                   | 0      | Membrane localized Akt                                    |
| 50 | PIP3:Aktc              | 0      | PIP3 bound to Akt                                         |
| 51 | PDK                    | 0.18   | PDK kinase                                                |
| 52 | PIP3:PDK               | 0      | PIP3 bound to PDK                                         |
| 53 | PDKa                   | 0      | Activated PDK                                             |
| 54 | PDKa:Aktm              | 0      | PDK bound to membrane localized Akt                       |
| 55 | Aktp                   | 0      | Akt phosphorylated                                        |
| 56 | PP2A                   | 0.0071 | Protein Phosphatase 2 A                                   |
| 57 | Aktp:PP2A              | 0      | Akt phosphorylated bound to PP2A                          |
| 58 | BLNK                   | 0.34   | B cell Linker Protein BLNK                                |
| 59 | Sykp:BLNK              | 0      | Sykp bound to BLNK                                        |
| 60 | BLNKp                  | 0      | BLNK phosphorylated                                       |
| 61 | BLNKp:Btkp             | 0      | BLNKp bound to Btkp                                       |
| 62 | Grb2                   | 1      | Adapter Protein Grb2                                      |
| 63 | BLNKp:Grb2             | 0      | BLNKp bound to Grb2                                       |
| 64 | Pase2                  | 0.01   | Phosphatase 2                                             |
| 65 | BLNKp:Pase2            | 0      | Phosphatase 2 bound to BLNK                               |
| 66 | SoS                    | 0.01   | Son of Sevenless exchanger protein for GDP GTP exchange   |
| 67 | BLNKp:Grb2:SoS         | 0      | Complete complex for lymphocyte RasGTP exchanger          |
| 68 | PLCg                   | 0.8    | Phospholipase C gamma2                                    |
| 69 | BLNKp:Btkp:PLCg        | 0      | BLNKp bound to Btkp and PLCg                              |
| 70 | PLCgp                  | 0      | Phosphorylated PLCg                                       |
| 71 | IP3                    | 0      | IP3                                                       |
| 72 | DAG                    | 0      | Diacyl glycerol                                           |
| 73 | Pase3                  | 0.02   | Phosphatase 3                                             |
| 74 | PLCgp:Pase3            | 0      | PLCgp bound to Phosphatase3                               |
| 75 | ip3deg                 | 0      | IP3 degradation product                                   |
| 76 | dagdeg                 | 0      | DAG degradation product                                   |
| 77 | PKCcyt                 | 0.7884 | Cytosolic Protein kinase C                                |
| 78 | PKCcyt:DAG             | 0      | PKC bound to DAG                                          |
| 79 | PKCm                   | 0      | Membrane localized PKC                                    |
| 80 | RasGDP                 | 0.0454 | Ras bound with GDP                                        |
| 81 | RasGTP                 | 0      | Ras bound with GTP                                        |
| 82 | GEF                    | 0.01   | Guanine exchange factor                                   |
| 83 | GEFp                   | 0      | GEF phosphorylated                                        |
| 84 | GEFp:RasGDP            | 0      | GEFp bound to RasGDP                                      |
| 85 | GEF:PKCm               | 0      | GEF bound to PKC                                          |
| 86 | GAP                    | 0.002  | GTPase activating Protein                                 |
| 87 | PKCm:GAP               | 0      | PKCm bound to the GAP                                     |
| 88 | GAPp                   | 0      | GAP phosphorylated                                        |
| 89 | PKCm:Sykp              | 0      | Membrane localized PKC bound to Sykp                      |
| 90 | Sykpp                  | 0      | Inhibited Double phosphorylated Syk                       |
| 91 | GAP:RasGTP             | 0      | GAP bound to RasGTP                                       |
| 92 | Raf                    | 0.0885 | Raf                                                       |



|     |                 |          |                                                         |
|-----|-----------------|----------|---------------------------------------------------------|
| 93  | Raf:RasGTP      | 0        | Raf bound to RasGTP                                     |
| 94  | Raf:RasGTP:PKCm | 0        | RafRasGTP bound to PKC                                  |
| 95  | Rafp            | 0        | Raf phosphorylated                                      |
| 96  | Rafser259       | 0        | Raf phosphorylated at inhibitory serine259              |
| 97  | Raf:Aktp        | 0        | Raf bound to Akt                                        |
| 98  | PP1             | 0.4748   | Protein Phosphatase 1                                   |
| 99  | Rafser259:PP1   | 0        | RafSer259 bound to PP1                                  |
| 100 | Rafp:Aktp       | 0        | Rafp bound to Aktp                                      |
| 101 | Rafpp           | 0        | Raf double phosphorylated                               |
| 102 | Rafpp:PP1       | 0        | Rafpp bound to PP1                                      |
| 103 | Rafp:PP2A       | 0        | Rafp bound to PP2A                                      |
| 104 | Btkcyt          | 0.126    | Btk cytoplasmic                                         |
| 105 | Sykp:PLCg       | 0        | Sykp bound to PLCg                                      |
| 106 | Rafp:PP1        | 0        | Rafp bound to PP1                                       |
| 107 | MEK             | 0.0886   | MEK kinase                                              |
| 108 | Rafp:MEK        | 0        | Rafp bound to MEK                                       |
| 109 | MEKp            | 0        | MEK phosphorylated                                      |
| 110 | Rafp:MEKp       | 0        | Rafp bound to MEKp                                      |
| 111 | MEKpp           | 0        | MEK double phosphorylated and completely activated form |
| 112 | CK2alpha        | 0.12     | Casein kinase 2 Alpha                                   |
| 113 | PKCm:CK2alpha   | 0        | Membrane localized PKC bound to Casein kinase 2 alpha   |
| 114 | CK2alphap       | 0        | CK2alpha phosphorylated                                 |
| 115 | MKP3            | 0.0015   | DUSP6 of MAPkinase phosphatase3                         |
| 116 | CK2alphap:MKP3  | 0        | CK2alpha phoaphorylated bound to MKP3                   |
| 117 | MKP3p           | 0        | phosphorylated MKP3                                     |
| 118 | MKP3p:PP2A      | 0        | MKP3p bound to PP2A                                     |
| 119 | MEKpp:PP2A      | 0        | MEKpp bound to PP2A                                     |
| 120 | MEKp:PP2A       | 0        | MEKp bound to PP2A                                      |
| 121 | MEKpp:MKP3p     | 0        | MEKpp bound to MKP3p                                    |
| 122 | MEKp:MKP3p      | 0        | MEKpbound to MKP3p                                      |
| 123 | ERK             | 0.5674   | Extracellular signal regulated Kinase                   |
| 124 | ERK:MEKpp       | 0        | ERK bound to MEKpp                                      |
| 125 | ERKp            | 0        | ERK phsophorylated                                      |
| 126 | ERKp:MEKpp      | 0        | ERKp bound to MEKpp                                     |
| 127 | ERKpp           | 0        | ERK double phosphorylated and completely activated form |
| 128 | mkp1            | 0.00005  | MKP1 mRNA                                               |
| 129 | MKP1            | 0.0002   | MAPkinase phophatase 1                                  |
| 130 | mkp3            | 0.000375 | MKP3 mRNA                                               |
| 131 | mkp1ubi         | 0        | MKP1 degradation product                                |
| 132 | mkp3ubi         | 0        | MKP3 degradation product                                |
| 133 | ERKpp:MKP1      | 0        | ERKpp bound to MKP1                                     |
| 134 | MKP1p           | 0        | MKP1 phosphorylated                                     |
| 135 | MKP1p:MKP3p     | 0        | MKP1p bound to MKP3p                                    |
| 136 | MKP2            | 0.002    | MAPkinase phophatase 2                                  |
| 137 | ERKpp:MKP2      | 0        | ERKpp bound to MKP2                                     |
| 138 | ERKp:MKP2       | 0        | ERKp bound to MKP2                                      |
| 139 | ERKpp:MKP3      | 0        | ERKpp Bound to MKP3                                     |
| 140 | ERKp:MKP3       | 0        | ERKp bound to MKP3                                      |
| 141 | TrCmplx         | 1        | Transcriptional complex                                 |
| 142 | Rafp:ERKpp      | 0        | Rafp bound to ERKpp                                     |

|     |                |      |                                                                                                                         |
|-----|----------------|------|-------------------------------------------------------------------------------------------------------------------------|
| 143 | Rafser259:PP2A | 0    | Rafser259 bound to PP2A                                                                                                 |
| 144 | Rafpp:PP2A     | 0    | Rafpp bound to PP2A                                                                                                     |
| 145 | ERKtrns        | 0    | ERK                                                                                                                     |
| 146 | Rafp:RasGTP    | 0    | RafpRasGTP complex                                                                                                      |
| 147 | L:BCRp:SHP1    | 0    | SHP1 bound to ITAM at the first phosphorylation site<br>SHP1 bound to ITAM at other site which are later phosphorylated |
| 148 | L:BCRpp:SHP1   | 0    | by Syk                                                                                                                  |
| 149 | ERKp:MKP1p     | 0    | ERKpp bound to MKP1p                                                                                                    |
| 150 | ERKpp:MKP1p    | 0    | ERKp bound to MKP1p                                                                                                     |
| 151 | MKP1:ERKpp     | 0    | MKP1 bound to ERKpp                                                                                                     |
| 152 | MKP1:ERKp      | 0    | MKP1 bound to ERKp                                                                                                      |
| 153 | TF             | 0.05 | Transcription Factor                                                                                                    |
| 154 | ERKpp:TF       | 0    | ERKpp bound to TF                                                                                                       |
| 155 | TFa            | 0    | Transcription Factor activated                                                                                          |
| 156 | NT             | 1    | Nucleotide representing DNA                                                                                             |
| 157 | TFa:NT         | 0    | TFa bound to the DNA(Representing active transcription)<br>ERK mediated MKP3' s phosphorylated form prone to            |
| 158 | MKP3x          | 0    | ubiquitination                                                                                                          |
| 159 | MKP3:ERKpp     | 0    | ERKpp bound to MKP3 where ERK is acting as an enzyme                                                                    |

All concentrations are in micromoles.

Initial amount in red color represents buffered/constant amount throughout the simulation

Lignad Unit conversion => 25 micro gram/ml ~ 0.05 micro moles

Concentrations of Raf, MEK, ERK, MKP1, PP2A, PP1, Akt, MKP2, RasGDP(total) are experimentally estimated. Rest of the concentrations are Estimated to best fit.

## 2. Reaction scheme and Reaction Rates:

|    | Reaction                                                                                                                        | Reaction Rate                                                             |
|----|---------------------------------------------------------------------------------------------------------------------------------|---------------------------------------------------------------------------|
| 1  | $L + BCR \leftrightarrow [L:BCR1]$                                                                                              | $kon\_1 * L * BCR - koff\_1 * [L:BCR1]$                                   |
| 2  | $[L:BCR] \rightarrow [L:BCRp]$                                                                                                  | $kf\_2 * [L:BCR] / (0.25 + [L:BCR])$                                      |
| 3  | $[L:BCRp] + Lyn \leftrightarrow [L:BCRp:Lyn]$                                                                                   | $kon\_3 * [L:BCRp] * Lyn - koff\_3 * [L:BCRp:Lyn]$                        |
| 4  | $[L:BCRp:Lyn] \rightarrow [L:BCRp] + Lynp$                                                                                      | $kcat\_4 * [L:BCRp:Lyn]$                                                  |
| 5  | $Lynp + SHP1 \leftrightarrow [Lynp:SHP1]$                                                                                       | $kon\_5 * Lynp * SHP1 - koff\_5 * [Lynp:SHP1]$                            |
| 6  | $[Lynp:SHP1] \rightarrow Lyn + SHP1$                                                                                            | $kcat\_6 * [Lynp:SHP1]$                                                   |
| 7  | $Lynp + CD22 \rightarrow Lynp + CD22p$                                                                                          | $vm\_7 * Lynp * CD22 / (km\_7 + CD22)$                                    |
| 8  | $CD22p + SHP1c \leftrightarrow [CD22p:SHP1c]$                                                                                   | $kf\_8 * CD22p * SHP1c - kb\_8 * [CD22p:SHP1c]$                           |
| 9  | $[CD22p:SHP1c] \rightarrow CD22p + SHP1$                                                                                        | $kcat\_9 * [CD22p:SHP1c]$                                                 |
| 10 | $SHP1 \rightarrow SHP1c$                                                                                                        | $kf\_10 * SHP1$                                                           |
| 11 | $CD22p \rightarrow CD22$                                                                                                        | $kf\_11 * CD22p$                                                          |
| 12 | $Lynp + Syk \leftrightarrow [Lynp:Syk]$                                                                                         | $kf\_12 * Lynp * Syk - kb\_12 * [Lynp:Syk]$                               |
| 13 | $[Lynp:Syk] \rightarrow Lynp + Sykp$                                                                                            | $kcat\_13 * [Lynp:Syk]$                                                   |
| 14 | $Sykp + SHP1 \leftrightarrow [Sykp:SHP1]$                                                                                       | $kf\_14 * Sykp * SHP1 - kb\_14 * [Sykp:SHP1]$                             |
| 15 | $[Sykp:SHP1] \rightarrow Syk + SHP1$                                                                                            | $kcat\_15 * [Sykp:SHP1]$                                                  |
| 16 | $[L:BCRp] + Sykp \leftrightarrow [L:BCRp:Sykp]$                                                                                 | $kf\_16 * [L:BCRp] * Sykp - kb\_16 * [L:BCRp:Sykp]$                       |
| 17 | $[L:BCRp:Sykp] \rightarrow [L:BCRpp] + Sykp$                                                                                    | $kcat\_17 * [L:BCRp:Sykp]$                                                |
| 18 | $[L:BCRpp] + Lyn \leftrightarrow [L:BCRpp:Lyn]$                                                                                 | $kf\_18 * [L:BCRpp] * Lyn - kb\_18 * [L:BCRpp:Lyn]$                       |
| 19 | $[L:BCRpp:Lyn] \rightarrow [L:BCRpp] + Lynp$                                                                                    | $kcat\_19 * [L:BCRpp:Lyn]$                                                |
| 20 | $BCRpro \rightarrow BCR$                                                                                                        | $kf\_20 * BCRpro$                                                         |
| 21 | $BCR \rightarrow BCRi$                                                                                                          | $kf\_21 * BCR$                                                            |
| 22 | $2 [L:BCR1] \leftrightarrow [L:BCR]$                                                                                            | $kon\_22 * [L:BCR1]^2 - koff\_22 * [L:BCR]$                               |
| 23 | $[L:BCR] \rightarrow BCRi + Li$                                                                                                 | $kf\_23 * [L:BCR]$                                                        |
| 24 | $Btk + Lynp \leftrightarrow [Btk:Lynp]$                                                                                         | $kf\_24 * Btk * Lynp - kb\_24 * [Btk:Lynp]$                               |
| 25 | $[Btk:Lynp] \rightarrow Btkp + Lynp$                                                                                            | $kcat\_25 * [Btk:Lynp]$                                                   |
| 26 | $Btk + Sykp \leftrightarrow [Btk:Sykp]$                                                                                         | $kf\_26 * Btk * Sykp - kb\_26 * [Btk:Sykp]$                               |
| 27 | $[Btk:Sykp] \rightarrow Btkp + Sykp$                                                                                            | $kcat\_27 * [Btk:Sykp]$                                                   |
| 28 | $Btkp + BtkPase \leftrightarrow [Btkp:BtkPase]$                                                                                 | $kf\_28 * Btkp * BtkPase - kb\_28 * [Btkp:BtkPase]$                       |
| 29 | $[Btkp:BtkPase] \rightarrow Btk + BtkPase$                                                                                      | $kcat\_29 * [Btkp:BtkPase]$                                               |
| 30 | $Lynp + CD19 \leftrightarrow [Lynp:CD19]$                                                                                       | $kf\_30 * Lynp * CD19 - kb\_30 * [Lynp:CD19]$                             |
| 31 | $[Lynp:CD19] \rightarrow Lynp + CD19p$                                                                                          | $kcat\_31 * [Lynp:CD19]$                                                  |
| 32 | $CD19p + p85PI3K \leftrightarrow [CD19p:p85PI3K]$<br>$[CD19p:p85PI3K] + p110PI3K \leftrightarrow$<br>$[CD19p:p85PI3K:p110PI3K]$ | $kf\_32 * CD19p * p85PI3K - kb\_32 * [CD19p:p85PI3K]$                     |
| 33 |                                                                                                                                 | $kf\_33 * [CD19p:p85PI3K] * p110PI3K - kb\_33 * [CD19p:p85PI3K:p110PI3K]$ |
| 34 | $[CD19p:p85PI3K:p110PI3K] \rightarrow CD19p + PI3K$                                                                             | $kcat\_34 * [CD19p:p85PI3K:p110PI3K]$                                     |
| 35 | $Sykp + BCAP \leftrightarrow [Sykp:BCAP]$                                                                                       | $kf\_35 * Sykp * BCAP - kb\_36 * [Sykp:BCAP]$                             |
| 36 | $[Sykp:BCAP] \rightarrow Sykp + BCAPp$                                                                                          | $kcat\_36 * [Sykp:BCAP]$                                                  |
| 37 | $BCAPp + p85PI3K \leftrightarrow [BCAPp:p85PI3K]$<br>$[BCAPp:p85PI3K] + p110PI3K \leftrightarrow$<br>$[BCAPp:p85PI3K:p110PI3K]$ | $kf\_37 * BCAPp * p85PI3K - kb\_37 * [BCAPp:p85PI3K]$                     |
| 38 |                                                                                                                                 | $kf\_38 * [BCAPp:p85PI3K] * p110PI3K - kb\_38 * [BCAPp:p85PI3K:p110PI3K]$ |
| 39 | $[BCAPp:p85PI3K:p110PI3K] \rightarrow BCAPp + PI3K$                                                                             | $kcat\_39 * [BCAPp:p85PI3K:p110PI3K]$                                     |
| 40 | $BCAPp + Pase1 \leftrightarrow [BCAPp:Pase1]$                                                                                   | $kf\_40 * BCAPp * Pase1 - kb\_40 * [BCAPp:Pase1]$                         |
| 41 | $[BCAPp:Pase1] \rightarrow BCAP + Pase1$                                                                                        | $kcat\_41 * [BCAPp:Pase1]$                                                |
| 42 | $CD19p \rightarrow CD19$                                                                                                        | $kf\_42 * CD19p$                                                          |
| 43 | $PI3K \rightarrow p85PI3K + p110PI3K$                                                                                           | $kf\_43 * PI3K$                                                           |
| 44 | $PIP2 + PI3K \rightarrow PIP3 + PI3K$                                                                                           | $vm\_44 * PIP2 * PI3K / (km\_44 + PIP2)$                                  |
| 45 | $PIP3 \rightarrow PIP2$                                                                                                         | $vm\_45 * PIP3 / (km\_45 + PIP3)$                                         |
| 46 | $PIP3 + Aktc \leftrightarrow [PIP3:Aktc]$                                                                                       | $kf\_46 * PIP3 * Aktc - kb\_46 * [PIP3:Aktc]$                             |

|    |                                           |                                                   |
|----|-------------------------------------------|---------------------------------------------------|
| 47 | [PIP3:Akte] <=> Aktm                      | kf_47*[PIP3:Akte] - kb_47*Aktm                    |
| 48 | PIP3 + PDK <=> [PIP3:PDK]                 | kf_48*PIP3*PDK - kb_48*[PIP3:PDK]                 |
| 49 | [PIP3:PDK] -> PDKa                        | kf_49*[PIP3:PDK]                                  |
| 50 | PDKa -> PDK + PIP3                        | kf_50*PDKa                                        |
| 51 | PDKa + Aktm <=> [PDKa:Aktm]               | kf_51*PDKa*Aktm - kb_51*[PDKa:Aktm]               |
| 52 | [PDKa:Aktm] -> PDKa + Aktp                | kcat_52*[PDKa:Aktm]                               |
| 53 | Aktp + PP2A <=> [Aktp:PP2A]               | kf_53*Aktp*PP2A - kb_53*[Aktp:PP2A]               |
| 54 | [Aktp:PP2A] -> Aktm + PP2A                | kcat_54*[Aktp:PP2A]                               |
| 55 | Sykp + BLNK <=> [Sykp:BLNK]               | kf_55*Sykp*BLNK - kb_55*[Sykp:BLNK]               |
| 56 | [Sykp:BLNK] -> Sykp + BLNKp               | kcat_56*[Sykp:BLNK]                               |
| 57 | BLNKp + Btkp <=> [BLNKp:Btkp]             | kf_57*BLNKp*Btkp - kb_57*[BLNKp:Btkp]             |
| 58 | BLNKp + Grb2 <=> [BLNKp:Grb2]             | kf_58*BLNKp*Grb2 - kb_58*[BLNKp:Grb2]             |
| 59 | BLNKp + Pase2 <=> [BLNKp:Pase2]           | kf_59*BLNKp*Pase2 - kb_59*[BLNKp:Pase2]           |
| 60 | [BLNKp:Pase2] -> BLNK + Pase2             | kcat_60*[BLNKp:Pase2]                             |
| 61 | [BLNKp:Grb2] + SoS <=> [BLNKp:Grb2:SoS]   | kf_61*[BLNKp:Grb2]*SoS - kb_61*[BLNKp:Grb2:SoS]   |
| 62 | [BLNKp:Btkp] + PLCg <=> [BLNKp:Btkp:PLCg] | kf_62*[BLNKp:Btkp]*PLCg - kb_62*[BLNKp:Btkp:PLCg] |
| 63 | [BLNKp:Btkp:PLCg] -> [BLNKp:Btkp] + PLCgp | kcat_63*[BLNKp:Btkp:PLCg]                         |
| 64 | PLCgp + Pase3 <=> [PLCgp:Pase3]           | kf_64*PLCgp*Pase3 - kb_64*[PLCgp:Pase3]           |
| 65 | [PLCgp:Pase3] -> PLCg + Pase3             | kcat_65*[PLCgp:Pase3]                             |
| 66 | IP3 -> ip3deg                             | kdeg_66*IP3                                       |
| 67 | DAG -> dagdeg                             | kdeg_67*DAG                                       |
| 68 | PLCgp + PIP2 -> PLCgp + IP3 + DAG         | vm_68 * PIP2 * PLCgp/(km_68 + PIP2)               |
| 69 | PKCcyt + DAG <=> [PKCcyt:DAG]             | kf_69*PKCcyt*DAG - kb_69*[PKCcyt:DAG]             |
| 70 | [PKCcyt:DAG] <=> PKCm                     | kf_70*[PKCcyt:DAG] - kb_70*PKCm                   |
| 71 | RasGTP -> RasGDP                          | kf_71*RasGTP                                      |
| 72 | GEFp + RasGDP <=> [GEFp:RasGDP]           | kf_72*GEFp*RasGDP - kb_72*[GEFp:RasGDP]           |
| 73 | [GEFp:RasGDP] -> GEFp + RasGTP            | kcat_73*[GEFp:RasGDP]                             |
| 74 | GEF + PKCm <=> [GEF:PKCm]                 | kf_74*GEF*PKCm - kb_74*[GEF:PKCm]                 |
| 75 | [GEF:PKCm] -> GEFp + PKCm                 | kcat_75*[GEF:PKCm]                                |
| 76 | PKCm + GAP <=> [PKCm:GAP]                 | kf_76*PKCm*GAP - kb_76*[PKCm:GAP]                 |
| 77 | [PKCm:GAP] -> PKCm + GAPp                 | kcat_77*[PKCm:GAP]                                |
| 78 | GEFp -> GEF                               | kf_78*GEFp                                        |
| 79 | GAPp -> GAP                               | kf_79*GAPp                                        |
| 80 | PKCm + Sykp <=> [PKCm:Sykp]               | kf_80*PKCm*Sykp - kb_80*[PKCm:Sykp]               |
| 81 | [PKCm:Sykp] -> PKCm + Sykpp               | kcat_81*[PKCm:Sykp]                               |
| 82 | Sykpp -> Sykp                             | kf_82*Sykpp                                       |
| 83 | GAP + RasGTP <=> [GAP:RasGTP]             | kf_83*GAP*RasGTP - kb_83*[GAP:RasGTP]             |
| 84 | [GAP:RasGTP] -> GAP + RasGDP              | kcat_84*[GAP:RasGTP]                              |
| 85 | Raf + RasGTP <=> [Raf:RasGTP]             | kf_85*Raf*RasGTP - kb_85*[Raf:RasGTP]             |
| 86 | [Raf:RasGTP] + PKCm <=> [Raf:RasGTP:PKCm] | kf_86*[Raf:RasGTP]*PKCm - kb_86*[Raf:RasGTP:PKCm] |
| 87 | [Raf:RasGTP:PKCm] -> [Rafp:RasGTP] + PKCm | kcat_87*[Raf:RasGTP:PKCm]                         |
| 88 | Raf + Aktp <=> [Raf:Aktp]                 | kf_88*Raf*Aktp - kb_88*[Raf:Aktp]                 |
| 89 | [Raf:Aktp] -> Rafser259 + Aktp            | kcat_89*[Raf:Aktp]                                |
| 90 | Rafser259 + PP1 <=> [Rafser259:PP1]       | kf_90*Rafser259*PP1 - kb_90*[Rafser259:PP1]       |
| 91 | [Rafser259:PP1] -> Raf + PP1              | kcat_91*[Rafser259:PP1]                           |
| 92 | Rafp + Aktp <=> [Rafp:Aktp]               | kf_92*Rafp*Aktp - kb_92*[Rafp:Aktp]               |
| 93 | [Rafp:Aktp] -> Rafpp + Aktp               | kcat_93*[Rafp:Aktp]                               |
| 94 | Rafpp + PP1 <=> [Rafpp:PP1]               | kf_94*Rafpp*PP1 - kb_94*[Rafpp:PP1]               |
| 95 | [Rafpp:PP1] -> Rafp + PP1                 | kcat_95*[Rafpp:PP1]                               |
| 96 | Rafp + PP2A <=> [Rafp:PP2A]               | kf_96*Rafp*PP2A - kb_96*[Rafp:PP2A]               |

|     |                                       |                                                 |
|-----|---------------------------------------|-------------------------------------------------|
| 97  | [Rafp:PP2A] -> Raf + PP2A             | kcat_97*[Rafp:PP2A]                             |
| 98  | Btkcyt + PIP3 <-> Btk                 | kf_98*Btkcyt*PIP3 - kb_98*Btk                   |
| 99  | Sykp + PLCg <-> [Sykp:PLCg]           | kf_99*Sykp*PLCg - kb_99*[Sykp:PLCg]             |
| 100 | [Sykp:PLCg] -> Sykp + PLCg            | kcat_100*[Sykp:PLCg]                            |
| 101 | Rafp + PP1 <-> [Rafp:PP1]             | kf_101*Rafp*PP1 - kb_101*[Rafp:PP1]             |
| 102 | [Rafp:PP1] -> Raf + PP1               | kcat_102*[Rafp:PP1]                             |
| 103 | Rafp + MEK <-> [Rafp:MEK]             | kf_103*Rafp*MEK - kb_103*[Rafp:MEK]             |
| 104 | [Rafp:MEK] -> Rafp + MEKp             | kcat_104*[Rafp:MEK]                             |
| 105 | Rafp + MEKp <-> [Rafp:MEKp]           | kf_105*Rafp*MEKp - kb_105*[Rafp:MEKp]           |
| 106 | [Rafp:MEKp] -> Rafp + MEKpp           | kcat_106*[Rafp:MEKp]                            |
| 107 | PKCm + CK2alpha <-> [PKCm:CK2alpha]   | kf_107*PKCm*CK2alpha - kb_107*[PKCm:CK2alpha]   |
| 108 | [PKCm:CK2alpha] -> PKCm + CK2alphap   | kcat_108*[PKCm:CK2alpha]                        |
| 109 | CK2alphap -> CK2alpha                 | kf_109 * CK2alphap * PP2A/(0.05 + CK2alphap)    |
| 110 | CK2alphap + MKP3 <-> [CK2alphap:MKP3] | kf_110*CK2alphap*MKP3 - kb_110*[CK2alphap:MKP3] |
| 111 | [CK2alphap:MKP3] -> CK2alphap + MKP3p | kcat_111*[CK2alphap:MKP3]                       |
| 112 | MKP3p + PP2A <-> [MKP3p:PP2A]         | kf_112*MKP3p*PP2A - kb_112*[MKP3p:PP2A]         |
| 113 | [MKP3p:PP2A] -> MKP3 + PP2A           | kcat_113*[MKP3p:PP2A]                           |
| 114 | MEKpp + PP2A <-> [MEKpp:PP2A]         | kf_114*MEKpp*PP2A - kb_114*[MEKpp:PP2A]         |
| 115 | [MEKpp:PP2A] -> MEKp + PP2A           | kcat_115*[MEKpp:PP2A]                           |
| 116 | MEKp + PP2A <-> [MEKp:PP2A]           | kf_116*MEKp*PP2A - kb_116*[MEKp:PP2A]           |
| 117 | [MEKp:PP2A] -> MEK + PP2A             | kcat_117*[MEKp:PP2A]                            |
| 118 | MEKpp + MKP3p <-> [MEKpp:MKP3p]       | kf_118*MEKpp*MKP3p - kb_118*[MEKpp:MKP3p]       |
| 119 | [MEKpp:MKP3p] -> MEKp + MKP3p         | kcat_119*[MEKpp:MKP3p]                          |
| 120 | MEKp + MKP3p <-> [MEKp:MKP3p]         | kf_120*MEKp*MKP3p - kb_120*[MEKp:MKP3p]         |
| 121 | [MEKp:MKP3p] -> MEK + MKP3p           | kcat_121*[MEKp:MKP3p]                           |
| 122 | ERK + MEKpp <-> [ERK:MEKpp]           | kf_122*ERK*MEKpp - kb_122*[ERK:MEKpp]           |
| 123 | [ERK:MEKpp] -> ERKp + MEKpp           | kcat_123*[ERK:MEKpp]                            |
| 124 | ERKp + MEKpp <-> [ERKp:MEKpp]         | kf_124*ERKp*MEKpp - kb_124*[ERKp:MEKpp]         |
| 125 | [ERKp:MEKpp] -> ERKpp + MEKpp         | kcat_125*[ERKp:MEKpp]                           |
| 126 | mkp1 <-> MKP1                         | kf_126*mkp1 - kb_126*MKP1                       |
| 127 | mkp3 <-> MKP3                         | kf_127*mkp3 - kb_127*MKP3                       |
| 128 | MKP1 -> mkp1ubi                       | kf_128*MKP1                                     |
| 129 | MKP3 -> mkp3ubi                       | kf_129*MKP3                                     |
| 130 | ERKpp + MKP1 <-> [ERKpp:MKP1]         | kf_130*ERKpp*MKP1 - kb_130*[ERKpp:MKP1]         |
| 131 | [ERKpp:MKP1] -> ERKpp + MKP1p         | kcat_131*[ERKpp:MKP1]                           |
| 132 | MKP1p + MKP3p <-> [MKP1p:MKP3p]       | kf_132*MKP1p*MKP3p - kb_132*[MKP1p:MKP3p]       |
| 133 | [MKP1p:MKP3p] -> MKP1 + MKP3p         | kcat_133*[MKP1p:MKP3p]                          |
| 134 | ERKpp + MKP2 <-> [ERKpp:MKP2]         | kf_134*ERKpp*MKP2 - kb_134*[ERKpp:MKP2]         |
| 135 | [ERKpp:MKP2] -> ERKp + MKP2           | kcat_135*[ERKpp:MKP2]                           |
| 136 | ERKp + MKP2 <-> [ERKp:MKP2]           | kf_136*ERKp*MKP2 - kb_136*[ERKp:MKP2]           |
| 137 | [ERKp:MKP2] -> ERK + MKP2             | kcat_137*[ERKp:MKP2]                            |
| 138 | ERKpp + MKP3 <-> [ERKpp:MKP3p]        | kf_138*ERKpp*MKP3 - kb_138*[ERKpp:MKP3p]        |
| 139 | [ERKpp:MKP3p] -> ERKp + MKP3          | kcat_139*[ERKpp:MKP3p]                          |
| 140 | ERKp + MKP3 <-> [ERKp:MKP3p]          | kf_140*ERKp*MKP3 - kb_140*[ERKp:MKP3p]          |
| 141 | [ERKp:MKP3p] -> ERK + MKP3            | kcat_141*[ERKp:MKP3p]                           |
| 142 | TrCmplx -> mkp1                       | kf_142*TrCmplx                                  |
| 143 | TrCmplx -> mkp3                       | kf_143*TrCmplx                                  |
| 144 | Rafp + ERKpp <-> [Rafp:ERKpp]         | kf_144*Rafp*ERKpp - kb_144*[Rafp:ERKpp]         |
| 145 | [Rafp:ERKpp] -> Rafpp + ERKpp         | kcat_145*[Rafp:ERKpp]                           |
| 146 | Rafser259 + PP2A <-> [Rafser259:PP2A] | kf_146*Rafser259*PP2A - kb_147*[Rafser259:PP2A] |

|     |                                                        |                                                |
|-----|--------------------------------------------------------|------------------------------------------------|
| 147 | [Rafser259:PP2A] -> Raf + PP2A                         | kcat_147*[Rafser259:PP2A]                      |
| 148 | [Rafp:RasGTP] -> Rafp + RasGTP                         | kf_148*[Rafp:RasGTP]                           |
| 149 | [L:BCR1] + BCR <-> [L:BCR]                             | kf_149*[L:BCR1]*BCR - kb_149*[L:BCR]           |
| 150 | [L:BCRp] + SHP1 <-> [L:BCRp:SHP1]                      | kf_150*[L:BCRp]*SHP1 - kb_150*[L:BCRp:SHP1]    |
| 151 | [L:BCRp:SHP1] -> [L:BCR] + SHP1                        | kcat_151*[L:BCRp:SHP1]                         |
| 152 | [L:BCRpp] + SHP1 <-> [L:BCRpp:SHP1]                    | kf_152*[L:BCRpp]*SHP1 - kb_152*[L:BCRpp:SHP1]  |
| 153 | [L:BCRpp:SHP1] -> [L:BCRp] + SHP1                      | kcat_153*[L:BCRpp:SHP1]                        |
| 154 | [BLNKp:Grb2:SoS] + RasGDP -> [BLNKp:Grb2:SoS] + RasGTP | vm_154*RasGDP*[BLNKp:Grb2:SoS]/(km_154+RasGDP) |
| 155 | ERKpp + MKP1p <-> [ERKpp:MKP1p]                        | kf_155*ERKpp*MKP1p - kb_155*[ERKpp:MKP1p]      |
| 156 | [ERKpp:MKP1p] -> ERKp + MKP1p                          | kcat_156*[ERKpp:MKP1p]                         |
| 157 | ERKp + MKP1p <-> [ERKp:MKP1p]                          | kf_157*ERKp*MKP1p - kb_157*[ERKp:MKP1p]        |
| 158 | [ERKp:MKP1p] -> ERK + MKP1p                            | kcat_158*[ERKp:MKP1p]                          |
| 159 | ERKpp + MKP1 <-> [MKP1:ERKpp]                          | kf_159*ERKpp*MKP1 - kb_159*[MKP1:ERKpp]        |
| 160 | [MKP1:ERKpp] -> MKP1 + ERKp                            | kcat_160*[MKP1:ERKpp]                          |
| 161 | ERKp + MKP1 <-> [MKP1:ERKp]                            | kf_161*ERKp*MKP1 - kb_161*[MKP1:ERKp]          |
| 162 | [MKP1:ERKp] -> MKP1 + ERK                              | kcat_162*[MKP1:ERKp]                           |
| 163 | ERKpp + TF <-> [ERKpp:TF]                              | kf_163*ERKpp*TF - kb_163*[ERKpp:TF]            |
| 164 | [ERKpp:TF] -> ERKpp + TFa                              | kcat_164*[ERKpp:TF]                            |
| 165 | TFa + NT <-> [TFa:NT]                                  | kf_165*TFa*NT - kb_165*[TFa:NT]                |
| 166 | TFa -> TF                                              | kf_166*TFa                                     |
| 167 | NT -> mkp1                                             | trnsc_167*NT*[TFa:NT]                          |
| 168 | NT -> mkp3                                             | trnsc_168*NT*[TFa:NT]                          |
| 169 | PKCm -> PKCcyt                                         | kf_169*PKCm                                    |
| 170 | MKP3 + ERKpp <-> [MKP3:ERKpp]                          | kf_170*MKP3*ERKpp - kb_170*[MKP3:ERKpp]        |
| 171 | [MKP3:ERKpp] -> MKP3x + ERKpp                          | kcat_171*[MKP3:ERKpp]                          |
| 172 | MKP3x -> mkp3xubi                                      | kf_172*MKP3x                                   |

### 3. Parameter Details:

| Sr. No. | Parameter | Scope (Reaction)                    | Value    |
|---------|-----------|-------------------------------------|----------|
| 1       | kon_1     | L + BCR <-> [L:BCR1]                | 50       |
| 2       | koff_1    | L + BCR <-> [L:BCR1]                | 10       |
| 3       | kf_2      | [L:BCR] -> [L:BCRp]                 | 0.99     |
| 4       | kon_3     | [L:BCRp] + Lyn <-> [L:BCRp:Lyn]     | 0.8857   |
| 5       | koff_3    | [L:BCRp] + Lyn <-> [L:BCRp:Lyn]     | 0.8766   |
| 6       | kcat_4    | [L:BCRp:Lyn] -> [L:BCRp] + Lynp     | 0.515    |
| 7       | kon_5     | Lynp + SHP1 <-> [Lynp:SHP1]         | 7        |
| 8       | koff_5    | Lynp + SHP1 <-> [Lynp:SHP1]         | 7.9716   |
| 9       | kcat_6    | [Lynp:SHP1] -> Lyn + SHP1           | 2        |
| 10      | km_7      | Lynp + CD22 -> Lynp + CD22p         | 1.933    |
| 11      | vm_7      | Lynp + CD22 -> Lynp + CD22p         | 5.4291   |
| 12      | kf_8      | CD22p + SHP1c <-> [CD22p:SHP1c]     | 0.7532   |
| 13      | kb_8      | CD22p + SHP1c <-> [CD22p:SHP1c]     | 1.201    |
| 14      | kcat_9    | [CD22p:SHP1c] -> CD22p + SHP1       | 0.9426   |
| 15      | kf_10     | SHP1 -> SHP1c                       | 0.01     |
| 16      | kf_11     | CD22p -> CD22                       | 0.0943   |
| 17      | kb_12     | Lynp + Syk <-> [Lynp:Syk]           | 8.7948   |
| 18      | kf_12     | Lynp + Syk <-> [Lynp:Syk]           | 0.448    |
| 19      | kcat_13   | [Lynp:Syk] -> Lynp + Sykp           | 21.56515 |
| 20      | kf_14     | Sykp + SHP1 <-> [Sykp:SHP1]         | 20       |
| 21      | kb_14     | Sykp + SHP1 <-> [Sykp:SHP1]         | 3.6      |
| 22      | kcat_15   | [Sykp:SHP1] -> Syk + SHP1           | 0.9      |
| 23      | kf_16     | [L:BCRp] + Sykp <-> [L:BCRp:Sykp]   | 0.3143   |
| 24      | kb_16     | [L:BCRp] + Sykp <-> [L:BCRp:Sykp]   | 1.2092   |
| 25      | kcat_17   | [L:BCRp:Sykp] -> [L:BCRpp] + Sykp   | 0.3023   |
| 26      | kf_18     | [L:BCRpp] + Lyn <-> [L:BCRpp:Lyn]   | 0.899    |
| 27      | kb_18     | [L:BCRpp] + Lyn <-> [L:BCRpp:Lyn]   | 0.8766   |
| 28      | kcat_19   | [L:BCRpp:Lyn] -> [L:BCRpp] + Lynp   | 0.6915   |
| 29      | kf_20     | BCRpro -> BCR                       | 1.5E-06  |
| 30      | kf_21     | BCR -> BCRi                         | 1.5E-06  |
| 31      | kon_22    | 2 [L:BCR1] <-> [L:BCR]              | 10       |
| 32      | koff_22   | 2 [L:BCR1] <-> [L:BCR]              | 5        |
| 33      | kf_23     | [L:BCR] -> BCRi + Li                | 0.0067   |
| 34      | kf_24     | Btk + Lynp <-> [Btk:Lynp]           | 0.645    |
| 35      | kb_24     | Btk + Lynp <-> [Btk:Lynp]           | 4        |
| 36      | kcat_25   | [Btk:Lynp] -> Btkp + Lynp           | 1        |
| 37      | kf_26     | Btk + Sykp <-> [Btk:Sykp]           | 2.4      |
| 38      | kb_26     | Btk + Sykp <-> [Btk:Sykp]           | 4        |
| 39      | kcat_27   | [Btk:Sykp] -> Btkp + Sykp           | 4        |
| 40      | kf_28     | Btkp + BtkPase <-> [Btkp:BtkPase]   | 12       |
| 41      | kb_28     | Btkp + BtkPase <-> [Btkp:BtkPase]   | 16       |
| 42      | kcat_29   | [Btkp:BtkPase] -> Btk + BtkPase     | 4        |
| 43      | kf_30     | Lynp + CD19 <-> [Lynp:CD19]         | 1.2245   |
| 44      | kb_30     | Lynp + CD19 <-> [Lynp:CD19]         | 12       |
| 45      | kcat_31   | [Lynp:CD19] -> Lynp + CD19p         | 3        |
| 46      | kf_32     | CD19p + p85PI3K <-> [CD19p:p85PI3K] | 0.00345  |
| 47      | kb_32     | CD19p + p85PI3K <-> [CD19p:p85PI3K] | 1.064    |

|    |         |                                                         |          |
|----|---------|---------------------------------------------------------|----------|
| 48 | kf_33   | [CD19p:p85PI3K] + p110PI3K <-> [CD19p:p85PI3K:p110PI3K] | 0.2      |
| 49 | kb_33   | [CD19p:p85PI3K] + p110PI3K <-> [CD19p:p85PI3K:p110PI3K] | 4        |
| 50 | kcat_34 | [CD19p:p85PI3K:p110PI3K] -> CD19p + PI3K                | 1        |
| 51 | kf_35   | Sykp + BCAP <-> [Sykp:BCAP]                             | 4.8699   |
| 52 | kb_36   | Sykp + BCAP <-> [Sykp:BCAP]                             | 14       |
| 53 | kcat_36 | [Sykp:BCAP] -> Sykp + BCAPp                             | 3.5      |
| 54 | kf_37   | BCAPp + p85PI3K <-> [BCAPp:p85PI3K]                     | 0.5      |
| 55 | kb_37   | BCAPp + p85PI3K <-> [BCAPp:p85PI3K]                     | 3        |
| 56 | kf_38   | [BCAPp:p85PI3K] + p110PI3K <-> [BCAPp:p85PI3K:p110PI3K] | 22       |
| 57 | kb_38   | [BCAPp:p85PI3K] + p110PI3K <-> [BCAPp:p85PI3K:p110PI3K] | 24       |
| 58 | kcat_39 | [BCAPp:p85PI3K:p110PI3K] -> BCAPp + PI3K                | 6        |
| 59 | kf_40   | BCAPp + Pase1 <-> [BCAPp:Pase1]                         | 22       |
| 60 | kb_40   | BCAPp + Pase1 <-> [BCAPp:Pase1]                         | 8        |
| 61 | kcat_41 | [BCAPp:Pase1] -> BCAP + Pase1                           | 2        |
| 62 | kf_42   | CD19p -> CD19                                           | 0.1      |
| 63 | kf_43   | PI3K -> p85PI3K + p110PI3K                              | 0.251829 |
| 64 | km_44   | PIP2 + PI3K -> PIP3 + PI3K                              | 0.00391  |
| 65 | vm_44   | PIP2 + PI3K -> PIP3 + PI3K                              | 1.69     |
| 66 | km_45   | PIP3 -> PIP2                                            | 0.092    |
| 67 | vm_45   | PIP3 -> PIP2                                            | 1.7      |
| 68 | kf_46   | PIP3 + Akte <-> [PIP3:Akte]                             | 6        |
| 69 | kb_46   | PIP3 + Akte <-> [PIP3:Akte]                             | 12       |
| 70 | kf_47   | [PIP3:Akte] <-> Aktm                                    | 3        |
| 71 | kb_47   | [PIP3:Akte] <-> Aktm                                    | 0.3      |
| 72 | kf_48   | PIP3 + PDK <-> [PIP3:PDK]                               | 2.0408   |
| 73 | kb_48   | PIP3 + PDK <-> [PIP3:PDK]                               | 4.2      |
| 74 | kf_49   | [PIP3:PDK] -> PDKa                                      | 3.5261   |
| 75 | kf_50   | PDKa -> PDK + PIP3                                      | 0.9597   |
| 76 | kf_51   | PDKa + Aktm <-> [PDKa:Aktm]                             | 1200     |
| 77 | kb_51   | PDKa + Aktm <-> [PDKa:Aktm]                             | 4        |
| 78 | kcat_52 | [PDKa:Aktm] -> PDKa + Aktp                              | 1        |
| 79 | kf_53   | Aktp + PP2A <-> [Aktp:PP2A]                             | 12       |
| 80 | kb_53   | Aktp + PP2A <-> [Aktp:PP2A]                             | 0.65     |
| 81 | kcat_54 | [Aktp:PP2A] -> Aktm + PP2A                              | 2        |
| 82 | kf_55   | Sykp + BLNK <-> [Sykp:BLNK]                             | 2.4      |
| 83 | kb_55   | Sykp + BLNK <-> [Sykp:BLNK]                             | 4        |
| 84 | kcat_56 | [Sykp:BLNK] -> Sykp + BLNKp                             | 1        |
| 85 | kf_57   | BLNKp + Btkp <-> [BLNKp:Btkp]                           | 2.723833 |
| 86 | kb_57   | BLNKp + Btkp <-> [BLNKp:Btkp]                           | 1.8372   |
| 87 | kf_58   | BLNKp + Grb2 <-> [BLNKp:Grb2]                           | 1        |
| 88 | kb_58   | BLNKp + Grb2 <-> [BLNKp:Grb2]                           | 0.05     |
| 89 | kf_59   | BLNKp + Pase2 <-> [BLNKp:Pase2]                         | 222      |
| 90 | kb_59   | BLNKp + Pase2 <-> [BLNKp:Pase2]                         | 3.68     |
| 91 | kcat_60 | [BLNKp:Pase2] -> BLNK + Pase2                           | 0.926    |
| 92 | kf_61   | [BLNKp:Grb2] + SoS <-> [BLNKp:Grb2:SoS]                 | 0.05     |
| 93 | kb_61   | [BLNKp:Grb2] + SoS <-> [BLNKp:Grb2:SoS]                 | 1        |
| 94 | kf_62   | [BLNKp:Btkp] + PLCg <-> [BLNKp:Btkp:PLCg]               | 200      |
| 95 | kb_62   | [BLNKp:Btkp] + PLCg <-> [BLNKp:Btkp:PLCg]               | 0.6333   |
| 96 | kcat_63 | [BLNKp:Btkp:PLCg] -> [BLNKp:Btkp] + PLCgp               | 4        |
| 97 | kf_64   | PLCgp + Pase3 <-> [PLCgp:Pase3]                         | 52       |



|     |         |                                           |        |
|-----|---------|-------------------------------------------|--------|
| 98  | kb_64   | PLCgp + Pase3 <-> [PLCgp:Pase3]           | 0.54   |
| 99  | kcat_65 | [PLCgp:Pase3] -> PLCg + Pase3             | 4      |
| 100 | kdeg_66 | IP3 -> ip3deg                             | 0.021  |
| 101 | kdeg_67 | DAG -> dagdeg                             | 0.0225 |
| 102 | km_68   | PLCgp + PIP2 -> PLCgp + IP3 + DAG         | 0.05   |
| 103 | vm_68   | PLCgp + PIP2 -> PLCgp + IP3 + DAG         | 0.48   |
| 104 | kf_69   | PKCcyt + DAG <-> [PKCcyt:DAG]             | 0.45   |
| 105 | kb_69   | PKCcyt + DAG <-> [PKCcyt:DAG]             | 0.226  |
| 106 | kf_70   | [PKCcyt:DAG] <-> PKCm                     | 9.9    |
| 107 | kb_70   | [PKCcyt:DAG] <-> PKCm                     | 0.005  |
| 108 | kf_71   | RasGTP -> RasGDP                          | 0.25   |
| 109 | kf_72   | GEFp + RasGDP <-> [GEFp:RasGDP]           | 0.08   |
| 110 | kb_72   | GEFp + RasGDP <-> [GEFp:RasGDP]           | 0.033  |
| 111 | kcat_73 | [GEFp:RasGDP] -> GEFp + RasGTP            | 0.2    |
| 112 | kf_74   | GEF + PKCm <-> [GEF:PKCm]                 | 1.5    |
| 113 | kb_74   | GEF + PKCm <-> [GEF:PKCm]                 | 16     |
| 114 | kcat_75 | [GEF:PKCm] -> GEFp + PKCm                 | 4      |
| 115 | kf_76   | PKCm + GAP <-> [PKCm:GAP]                 | 1.3125 |
| 116 | kb_76   | PKCm + GAP <-> [PKCm:GAP]                 | 100    |
| 117 | kcat_77 | [PKCm:GAP] -> PKCm + GAPp                 | 25     |
| 118 | kf_78   | GEFp -> GEF                               | 0.1    |
| 119 | kf_79   | GAPp -> GAP                               | 0.1    |
| 120 | kf_80   | PKCm + Sykp <-> [PKCm:Sykp]               | 0.25   |
| 121 | kb_80   | PKCm + Sykp <-> [PKCm:Sykp]               | 3.92   |
| 122 | kcat_81 | [PKCm:Sykp] -> PKCm + Sykpp               | 0.98   |
| 123 | kf_82   | Sykpp -> Sykp                             | 0.041  |
| 124 | kf_83   | GAP + RasGTP <-> [GAP:RasGTP]             | 2.1666 |
| 125 | kb_83   | GAP + RasGTP <-> [GAP:RasGTP]             | 1      |
| 126 | kcat_84 | [GAP:RasGTP] -> GAP + RasGDP              | 10     |
| 127 | kf_85   | Raf + RasGTP <-> [Raf:RasGTP]             | 100    |
| 128 | kb_85   | Raf + RasGTP <-> [Raf:RasGTP]             | 2      |
| 129 | kf_86   | [Raf:RasGTP] + PKCm <-> [Raf:RasGTP:PKCm] | 8      |
| 130 | kb_86   | [Raf:RasGTP] + PKCm <-> [Raf:RasGTP:PKCm] | 0.0444 |
| 131 | kcat_87 | [Raf:RasGTP:PKCm] -> [Rafp:RasGTP] + PKCm | 4      |
| 132 | kf_88   | Raf + Aktp <-> [Raf:Aktp]                 | 2.5    |
| 133 | kb_88   | Raf + Aktp <-> [Raf:Aktp]                 | 4      |
| 134 | kcat_89 | [Raf:Aktp] -> Rafser259 + Aktp            | 1      |
| 135 | kf_90   | Rafser259 + PP1 <-> [Rafser259:PP1]       | 12.85  |
| 136 | kb_90   | Rafser259 + PP1 <-> [Rafser259:PP1]       | 9      |
| 137 | kcat_91 | [Rafser259:PP1] -> Raf + PP1              | 3      |
| 138 | kf_92   | Rafp + Aktp <-> [Rafp:Aktp]               | 0.89   |
| 139 | kb_92   | Rafp + Aktp <-> [Rafp:Aktp]               | 2      |
| 140 | kcat_93 | [Rafp:Aktp] -> Rafpp + Aktp               | 0.5    |
| 141 | kf_94   | Rafpp + PP1 <-> [Rafpp:PP1]               | 9.88   |
| 142 | kb_94   | Rafpp + PP1 <-> [Rafpp:PP1]               | 13.6   |
| 143 | kcat_95 | [Rafpp:PP1] -> Rafp + PP1                 | 3.4    |
| 144 | kf_96   | Rafp + PP2A <-> [Rafp:PP2A]               | 2.2    |
| 145 | kb_96   | Rafp + PP2A <-> [Rafp:PP2A]               | 16     |
| 146 | kcat_97 | [Rafp:PP2A] -> Raf + PP2A                 | 4      |
| 147 | kf_98   | Btkcyt + PIP3 <-> Btk                     | 90     |

|     |          |                                       |         |
|-----|----------|---------------------------------------|---------|
| 148 | kb_98    | Btkcyt + PIP3 <-> Btk                 | 0.00034 |
| 149 | kf_99    | Sykp + PLCg <-> [Sykp:PLCg]           | 10      |
| 150 | kb_99    | Sykp + PLCg <-> [Sykp:PLCg]           | 16      |
| 151 | kcat_100 | [Sykp:PLCg] -> Sykp + PLCgp           | 4       |
| 152 | kf_101   | Rafp + PP1 <-> [Rafp:PP1]             | 3       |
| 153 | kb_101   | Rafp + PP1 <-> [Rafp:PP1]             | 4       |
| 154 | kcat_102 | [Rafp:PP1] -> Raf + PP1               | 4       |
| 155 | kf_103   | Rafp + MEK <-> [Rafp:MEK]             | 6.8     |
| 156 | kb_103   | Rafp + MEK <-> [Rafp:MEK]             | 9.62    |
| 157 | kcat_104 | [Rafp:MEK] -> Rafp + MEKp             | 2.405   |
| 158 | kf_105   | Rafp + MEKp <-> [Rafp:MEKp]           | 6.8     |
| 159 | kb_105   | Rafp + MEKp <-> [Rafp:MEKp]           | 9.62    |
| 160 | kcat_106 | [Rafp:MEKp] -> Rafp + MEKpp           | 2.405   |
| 161 | kf_107   | PKCm + CK2alpha <-> [PKCm:CK2alpha]   | 2       |
| 162 | kb_107   | PKCm + CK2alpha <-> [PKCm:CK2alpha]   | 8       |
| 163 | kcat_108 | [PKCm:CK2alpha] -> PKCm + CK2alphap   | 2.667   |
| 164 | kf_109   | CK2alphap -> CK2alpha                 | 0.333   |
| 165 | kf_110   | CK2alphap + MKP3 <-> [CK2alphap:MKP3] | 1       |
| 166 | kb_110   | CK2alphap + MKP3 <-> [CK2alphap:MKP3] | 4.64    |
| 167 | kcat_111 | [CK2alphap:MKP3] -> CK2alphap + MKP3p | 1.16    |
| 168 | kf_112   | MKP3p + PP2A <-> [MKP3p:PP2A]         | 15      |
| 169 | kb_112   | MKP3p + PP2A <-> [MKP3p:PP2A]         | 16      |
| 170 | kcat_113 | [MKP3p:PP2A] -> MKP3 + PP2A           | 4       |
| 171 | kf_114   | MEKpp + PP2A <-> [MEKpp:PP2A]         | 1.31    |
| 172 | kb_114   | MEKpp + PP2A <-> [MEKpp:PP2A]         | 4       |
| 173 | kcat_115 | [MEKpp:PP2A] -> MEKp + PP2A           | 1       |
| 174 | kf_116   | MEKp + PP2A <-> [MEKp:PP2A]           | 1.31    |
| 175 | kb_116   | MEKp + PP2A <-> [MEKp:PP2A]           | 4       |
| 176 | kcat_117 | [MEKp:PP2A] -> MEK + PP2A             | 1       |
| 177 | kf_118   | MEKpp + MKP3p <-> [MEKpp:MKP3p]       | 26      |
| 178 | kb_118   | MEKpp + MKP3p <-> [MEKpp:MKP3p]       | 64      |
| 179 | kcat_119 | [MEKpp:MKP3p] -> MEKp + MKP3p         | 16      |
| 180 | kf_120   | MEKp + MKP3p <-> [MEKp:MKP3p]         | 26      |
| 181 | kb_120   | MEKp + MKP3p <-> [MEKp:MKP3p]         | 64      |
| 182 | kcat_121 | [MEKp:MKP3p] -> MEK + MKP3p           | 16      |
| 183 | kf_122   | ERK + MEKpp <-> [ERK:MEKpp]           | 1.6     |
| 184 | kb_122   | ERK + MEKpp <-> [ERK:MEKpp]           | 1       |
| 185 | kcat_123 | [ERK:MEKpp] -> ERKp + MEKpp           | 0.25    |
| 186 | kf_124   | ERKp + MEKpp <-> [ERKp:MEKpp]         | 1.6     |
| 187 | kb_124   | ERKp + MEKpp <-> [ERKp:MEKpp]         | 1       |
| 188 | kcat_125 | [ERKp:MEKpp] -> ERKpp + MEKpp         | 0.25    |
| 189 | kf_126   | mkp1 <-> MKP1                         | 0.0004  |
| 190 | kb_126   | mkp1 <-> MKP1                         | 0.0001  |
| 191 | kf_127   | mkp3 <-> MKP3                         | 0.0004  |
| 192 | kb_127   | mkp3 <-> MKP3                         | 0.0001  |
| 193 | kf_128   | MKP1 -> mkp1ubi                       | 3.7E-16 |
| 194 | kf_129   | MKP3 -> mkp3ubi                       | 3.7E-16 |
| 195 | kf_130   | ERKpp + MKP1 <-> [ERKpp:MKP1]         | 0.30101 |
| 196 | kb_130   | ERKpp + MKP1 <-> [ERKpp:MKP1]         | 4.44    |
| 197 | kcat_131 | [ERKpp:MKP1] -> ERKpp + MKP1p         | 2.2     |

|     |          |                                                        |          |
|-----|----------|--------------------------------------------------------|----------|
| 198 | kb_132   | MKP1p + MKP3p <-> [MKP1p:MKP3p]                        | 108      |
| 199 | kf_132   | MKP1p + MKP3p <-> [MKP1p:MKP3p]                        | 141      |
| 200 | kcat_133 | [MKP1p:MKP3p] -> MKP1 + MKP3p                          | 27       |
| 201 | kf_134   | ERKpp + MKP2 <-> [ERKpp:MKP2]                          | 76       |
| 202 | kb_134   | ERKpp + MKP2 <-> [ERKpp:MKP2]                          | 4        |
| 203 | kcat_135 | [ERKpp:MKP2] -> ERKp + MKP2                            | 1        |
| 204 | kf_136   | ERKp + MKP2 <-> [ERKp:MKP2]                            | 76       |
| 205 | kb_136   | ERKp + MKP2 <-> [ERKp:MKP2]                            | 4        |
| 206 | kcat_137 | [ERKp:MKP2] -> ERK + MKP2                              | 1        |
| 207 | kf_138   | ERKpp + MKP3 <-> [ERKpp:MKP3p]                         | 1        |
| 208 | kb_138   | ERKpp + MKP3 <-> [ERKpp:MKP3p]                         | 0.25     |
| 209 | kcat_139 | [ERKpp:MKP3p] -> ERKp + MKP3                           | 9        |
| 210 | kf_140   | ERKp + MKP3 <-> [ERKp:MKP3p]                           | 1        |
| 211 | kb_140   | ERKp + MKP3 <-> [ERKp:MKP3p]                           | 0.25     |
| 212 | kcat_141 | [ERKp:MKP3p] -> ERK + MKP3                             | 9        |
| 213 | kf_142   | TrCmplx -> mkp1                                        | 1E-18    |
| 214 | kf_143   | TrCmplx -> mkp3                                        | 1E-18    |
| 215 | kf_144   | Rafp + ERKpp <-> [Rafp:ERKpp]                          | 0.05     |
| 216 | kb_144   | Rafp + ERKpp <-> [Rafp:ERKpp]                          | 2        |
| 217 | kcat_145 | [Rafp:ERKpp] -> Rafpp + ERKpp                          | 0.5      |
| 218 | kf_146   | Rafser259 + PP2A <-> [Rafser259:PP2A]                  | 2.25     |
| 219 | kb_147   | Rafser259 + PP2A <-> [Rafser259:PP2A]                  | 8        |
| 220 | kcat_147 | [Rafser259:PP2A] -> Raf + PP2A                         | 4        |
| 221 | kf_148   | [Rafp:RasGTP] -> Rafp + RasGTP                         | 1        |
| 222 | kf_149   | [L:BCR1] + BCR <-> [L:BCR]                             | 10       |
| 223 | kb_149   | [L:BCR1] + BCR <-> [L:BCR]                             | 2        |
| 224 | kf_150   | [L:BCRp] + SHP1 <-> [L:BCRp:SHP1]                      | 83       |
| 225 | kb_150   | [L:BCRp] + SHP1 <-> [L:BCRp:SHP1]                      | 2.77     |
| 226 | kcat_151 | [L:BCRp:SHP1] -> [L:BCR] + SHP1                        | 1        |
| 227 | kf_152   | [L:BCRpp] + SHP1 <-> [L:BCRpp:SHP1]                    | 240      |
| 228 | kb_152   | [L:BCRpp] + SHP1 <-> [L:BCRpp:SHP1]                    | 2        |
| 229 | kcat_153 | [L:BCRpp:SHP1] -> [L:BCRp] + SHP1                      | 1        |
| 230 | km_154   | [BLNKp:Grb2:SoS] + RasGDP -> [BLNKp:Grb2:SoS] + RasGTP | 0.050505 |
| 231 | vm_154   | [BLNKp:Grb2:SoS] + RasGDP -> [BLNKp:Grb2:SoS] + RasGTP | 22       |
| 232 | kf_155   | ERKpp + MKP1p <-> [ERKpp:MKP1p]                        | 450      |
| 233 | kb_155   | ERKpp + MKP1p <-> [ERKpp:MKP1p]                        | 600      |
| 234 | kcat_156 | [ERKpp:MKP1p] -> ERKp + MKP1p                          | 150      |
| 235 | kf_157   | ERKp + MKP1p <-> [ERKp:MKP1p]                          | 450      |
| 236 | kb_157   | ERKp + MKP1p <-> [ERKp:MKP1p]                          | 600      |
| 237 | kcat_158 | [ERKp:MKP1p] -> ERK + MKP1p                            | 150      |
| 238 | kf_159   | ERKpp + MKP1 <-> [MKP1:ERKpp]                          | 30       |
| 239 | kb_159   | ERKpp + MKP1 <-> [MKP1:ERKpp]                          | 600      |
| 240 | kcat_160 | [MKP1:ERKpp] -> MKP1 + ERKp                            | 150      |
| 241 | kf_161   | ERKp + MKP1 <-> [MKP1:ERKp]                            | 30       |
| 242 | kb_161   | ERKp + MKP1 <-> [MKP1:ERKp]                            | 600      |
| 243 | kcat_162 | [MKP1:ERKp] -> MKP1 + ERK                              | 150      |
| 244 | kf_163   | ERKpp + TF <-> [ERKpp:TF]                              | 4        |
| 245 | kb_163   | ERKpp + TF <-> [ERKpp:TF]                              | 0.000335 |
| 246 | kcat_164 | [ERKpp:TF] -> ERKpp + TFa                              | 1        |
| 247 | kf_165   | TFa + NT <-> [TFa:NT]                                  | 0.0001   |

|     |           |                               |          |
|-----|-----------|-------------------------------|----------|
| 248 | kb_165    | TFa + NT <-> [TFa:NT]         | 0.0002   |
| 249 | kf_166    | TFa -> TF                     | 1E-25    |
| 250 | trnsc_167 | NT -> mkp1                    | 2E-07    |
| 251 | trnsc_168 | NT -> mkp3                    | 0.000002 |
| 252 | kf_169    | PKCm -> PKCcyt                | 0.1      |
| 253 | kf_170    | MKP3 + ERKpp <-> [MKP3:ERKpp] | 0.0034   |
| 254 | kb_170    | MKP3 + ERKpp <-> [MKP3:ERKpp] | 1        |
| 255 | kcat_171  | [MKP3:ERKpp] -> MKP3x + ERKpp | 0.25     |
| 256 | kf_172    | MKP3x -> mkp3xubi             | 1.5E-15  |

#### Units of rate

Constants kf \* => micromoles sec<sup>-1</sup> (for second order reactions), minromoles<sup>-1</sup> sec<sup>-1</sup> (for first order reactions)

kb\* => sec<sup>-1</sup>

kcat\* => sec<sup>-1</sup>

km\* => micromoles

vm\* => sec<sup>-1</sup>

#### References

- Bhalla US, Iyengar R (1999) Emergent properties of networks of biological signaling pathways. *Science* 283(5400): 381-387.
- Bhalla US, Ram PT, Iyengar R (2002) MAP kinase phosphatase as a locus of flexibility in a mitogen-activated protein kinase signaling network. *Science* 297(5583): 1018-1023.
- Castelli M, Camps M, Gillieron C, Leroy D, Arkinstall S et al. (2004) MAP kinase phosphatase 3 (MKP3) interacts with and is phosphorylated by protein kinase CK2alpha. *J Biol Chem* 279(43): 44731-44739.
- Hatakeyama M, Kimura S, Naka T, Kawasaki T, Yumoto N et al. (2003) A computational model on the modulation of mitogen-activated protein kinase (MAPK) and Akt pathways in heregulin-induced ErbB signalling. *Biochem J* 373(Pt 2): 451-463.
- Hou P, Araujo E, Zhao T, Zhang M, Massenburg D et al. (2006) B cell antigen receptor signaling and internalization are mutually exclusive events. *PLoS Biol* 4(7): e200.
- Jumaa H, Hendriks RW, Reth M (2005) B cell signaling and tumorigenesis. *Annu Rev Immunol* 23: 415-445.
- Kolch W (2000) Meaningful relationships: the regulation of the Ras/Raf/MEK/ERK pathway by protein interactions. *Biochem J* 351 Pt 2: 289-305.
- Kumar D, Dua R, Srikanth R, Jayaswal S, Siddiqui Z et al. (2008) Cellular phosphatases facilitate combinatorial processing of receptor-activated signals. *BMC Res Notes* 1(1): 81.
- Kurosaki T (1999) Genetic analysis of B cell antigen receptor signaling. *Annu Rev Immunol* 17: 555-592.
- Rolli V, Gallwitz M, Wossning T, Flemming A, Schamel WW et al. (2002) Amplification of B cell antigen receptor signaling by a Syk/ITAM positive feedback loop. *Mol Cell* 10(5): 1057-1069.

#### 4. Parameter Sensitivities for ppMEK response:

| Sr. No. | Parameter |           | Integrated response |          |           |           | Maximum Response |           |
|---------|-----------|-----------|---------------------|----------|-----------|-----------|------------------|-----------|
|         |           |           | LSA                 | MPSA     | PRCC      | WALS      | LSA              | PRCC      |
| 1       | kon_1     | 50        | -0.0081007          | 0.022403 | 0.030766  | -0.28509  | -0.010141        | 0.016148  |
| 2       | koff_1    | 10        | -0.0097747          | 0.033039 | -0.05571  | 0.25103   | -0.011007        | -0.021017 |
| 3       | kf_2      | 0.99      | 0.021816            | 0.044462 | 0.083205  | 0.97754   | 0.015703         | 0.083893  |
| 4       | kon_3     | 0.8857    | 0.037961            | 0.080739 | 0.11452   | 1.068     | 0.020371         | 0.1011    |
| 5       | koff_3    | 0.8766    | -0.024094           | 0.027268 | -0.095774 | 0.23895   | -0.016402        | -0.053244 |
| 6       | kcat_4    | 0.515     | 0.028017            | 0.036089 | 0.11286   | 0.96209   | 0.014187         | 0.059698  |
| 7       | kon_5     | 7         | -0.025633           | 0.028756 | -0.11493  | -0.23063  | -0.022721        | -0.10261  |
| 8       | koff_5    | 7.9716    | 0.020485            | 0.025379 | 0.086825  | 0.43516   | 0.018164         | 0.061516  |
| 9       | kcat_6    | 2         | -0.022173           | 0.034916 | -0.086118 | -0.72688  | -0.019634        | -0.082868 |
| 10      | km_7      | 1.933     | 0.0099632           | 0.027374 | 0.04697   | 0.40499   | 0.0032908        | 0.11102   |
| 11      | vm_7      | 5.4291    | -0.010466           | 0.024241 | -0.10115  | -0.24109  | -0.0034468       | -0.074296 |
| 12      | kf_8      | 0.7532    | -0.019452           | 0.06456  | -0.12269  | -0.77121  | -0.0094957       | -0.12217  |
| 13      | kb_8      | 1.201     | 0.011778            | 0.04732  | 0.062739  | -0.57419  | 0.0094012        | 0.089788  |
| 14      | kcat_9    | 0.9426    | -0.012544           | 0.051637 | -0.075791 | -0.48004  | -0.0098686       | -0.078189 |
| 15      | kf_10     | 0.01      | 0.014677            | 0.033638 | 0.094215  | 0.55321   | 0.012396         | 0.13037   |
| 16      | kf_11     | 0.0943    | 0.0090196           | 0.02416  | 0.09529   | 1.3283    | 0.0076195        | 0.031896  |
| 17      | kb_12     | 8.7948    | -0.016071           | 0.059304 | -0.11806  | -0.14312  | -0.0071009       | -0.10356  |
| 18      | kf_12     | 0.448     | 0.059742            | 0.073009 | 0.26925   | 1.9264    | 0.044916         | 0.20798   |
| 19      | kcat_13   | 21.56515  | 0.016559            | 0.066563 | 0.104     | 0.68319   | 0.0071351        | 0.099252  |
| 20      | kf_14     | 20        | -0.03284            | 0.10139  | -0.1909   | -1.2296   | -0.028173        | -0.17908  |
| 21      | kb_14     | 3.6       | 0.026695            | 0.067496 | 0.11745   | 0.61331   | 0.023037         | 0.13203   |
| 22      | kcat_15   | 0.9       | -0.036143           | 0.037746 | -0.14269  | -0.84015  | -0.031294        | -0.1405   |
| 23      | kf_16     | 0.3143    | -4.55E-05           | 0.026157 | 0.008245  | 0.050476  | -3.06E-05        | 0.02577   |
| 24      | kb_16     | 1.2092    | 3.62E-05            | 0.030967 | -0.018818 | -0.046604 | 2.48E-05         | -0.029067 |
| 25      | kcat_17   | 0.3023    | 0.0002029           | 0.025217 | 0.008797  | 0.021398  | 0.0001578        | -0.043619 |
| 26      | kf_18     | 0.899     | 0.0001714           | 0.037701 | 0.034444  | 0.067749  | 0.0001263        | 0.000524  |
| 27      | kb_18     | 0.8766    | -9.48E-05           | 0.030194 | 0.001578  | -0.031537 | -7.01E-05        | 0.005192  |
| 28      | kcat_19   | 0.6915    | 0.0001085           | 0.038444 | 0.012872  | 0.016004  | 7.89E-05         | -0.022479 |
| 29      | kf_20     | 0.0000015 | 5.64E-05            | 0.02248  | 0.00906   | 0.014351  | 2.88E-05         | -0.013605 |
| 30      | kf_21     | 0.0000015 | -1.04E-05           | 0.037115 | 0.011271  | 0.015617  | -5.21E-06        | 0.027675  |
| 31      | kon_22    | 10        | 0.010295            | 0.025772 | 0.030361  | -0.53256  | 0.009538         | -0.025329 |
| 32      | koff_22   | 5         | -0.0092921          | 0.025515 | -0.056159 | -0.037192 | -0.0083819       | -0.040964 |
| 33      | kf_23     | 0.0067    | -0.0039535          | 0.03418  | -0.019015 | -0.073003 | -0.0020674       | -0.040448 |
| 34      | kf_24     | 0.645     | -7.72E-05           | 0.020666 | -0.013823 | 0.006173  | -5.79E-05        | -0.008806 |
| 35      | kb_24     | 4         | 6.27E-05            | 0.022342 | 0.022475  | 0.025535  | 4.71E-05         | -0.006567 |
| 36      | kcat_25   | 1         | 2.41E-05            | 0.02522  | -0.039585 | 0.008775  | 3.23E-06         | 0.013814  |
| 37      | kf_26     | 2.4       | -0.0003707          | 0.02418  | 0.024793  | -0.002274 | -0.0004054       | 0.008076  |
| 38      | kb_26     | 4         | 0.0001856           | 0.050836 | -0.027158 | -0.014835 | 0.0002027        | -0.013369 |
| 39      | kcat_27   | 4         | 0.000247            | 0.022313 | -0.005519 | 0.020469  | 0.0001306        | 0.012264  |
| 40      | kf_28     | 12        | -1.23E-05           | 0.036251 | -0.005939 | -0.03654  | 8.33E-05         | -0.035589 |
| 41      | kb_28     | 16        | 9.87E-06            | 0.024293 | 0.034774  | 0.030026  | -6.64E-05        | 0.041715  |
| 42      | kcat_29   | 4         | -1.45E-05           | 0.029715 | 0.000681  | -0.030381 | 6.18E-05         | -0.029219 |
| 43      | kf_30     | 1.2245    | -0.0001795          | 0.026945 | -0.004385 | 0.032754  | -4.51E-05        | 0.045795  |
| 44      | kb_30     | 12        | 0.000144            | 0.020191 | -0.000206 | -0.045476 | 3.65E-05         | 0.003205  |
| 45      | kcat_31   | 3         | 5.28E-05            | 0.028023 | -0.000349 | -0.009227 | 1.55E-05         | -0.006234 |
| 46      | kf_32     | 0.00345   | -1.85E-08           | 0.034965 | 0.022738  | 0.002182  | 3.75E-08         | 0.016258  |

|    |         |           |            |          |           |           |            |           |
|----|---------|-----------|------------|----------|-----------|-----------|------------|-----------|
| 47 | kb_32   | 1.064     | 1.50E-07   | 0.025267 | 0.013023  | 0.015458  | 2.73E-07   | -0.017255 |
| 48 | kf_33   | 0.2       | 2.78E-08   | 0.032351 | -0.001672 | -0.007182 | 5.21E-08   | 0.010171  |
| 49 | kb_33   | 4         | -1.72E-07  | 0.024641 | -0.001804 | 0.034612  | -2.19E-07  | 0.002049  |
| 50 | kcat_34 | 1         | 7.41E-07   | 0.02884  | -0.001708 | 0.007776  | 5.67E-07   | 0.009812  |
| 51 | kf_35   | 4.8699    | -0.0006919 | 0.022182 | 0.021453  | 0.030564  | -0.0003385 | 0.026789  |
| 52 | kb_36   | 14        | 0.0005531  | 0.040409 | -0.013835 | -0.009489 | 0.0002706  | 0.004046  |
| 53 | kcat_36 | 3.5       | 0.0005476  | 0.02858  | 0.014906  | 0.068369  | 0.0002958  | 0.033874  |
| 54 | kf_37   | 0.5       | 2.38E-05   | 0.036503 | -0.013383 | -0.000978 | -1.04E-05  | 0.024591  |
| 55 | kb_37   | 3         | -2.02E-05  | 0.026298 | -0.047085 | -0.058536 | 7.90E-06   | -0.004178 |
| 56 | kf_38   | 22        | 1.49E-05   | 0.026599 | 0.027291  | 0.019746  | -1.23E-05  | -0.002128 |
| 57 | kb_38   | 24        | -1.08E-05  | 0.025441 | -0.009106 | 0.26488   | 1.06E-05   | 0.003194  |
| 58 | kcat_39 | 6         | 1.03E-05   | 0.014389 | 0.01513   | 0.009044  | -1.12E-05  | -0.005399 |
| 59 | kf_40   | 22        | -0.0003056 | 0.026418 | -0.002026 | -0.022647 | -0.0001913 | -0.002242 |
| 60 | kb_40   | 8         | 0.000246   | 0.030341 | 0.019099  | 0.059647  | 0.0001544  | -0.01942  |
| 61 | kcat_41 | 2         | -0.0002974 | 0.035801 | -0.010917 | -0.024509 | -0.0001911 | 0.02435   |
| 62 | kf_42   | 0.1       | -1.33E-05  | 0.034853 | 0.012684  | 0.004526  | -4.82E-06  | -0.002631 |
| 63 | kf_43   | 0.251829  | -8.94E-06  | 0.032853 | -0.011761 | 0.28347   | 1.37E-05   | 0.017002  |
| 64 | km_44   | 0.00391   | 9.07E-08   | 0.040798 | -0.003569 | -0.006459 | 1.00E-07   | 0.005645  |
| 65 | vm_44   | 1.69      | 1.88E-05   | 0.02641  | 0.008777  | 0.000495  | -1.42E-05  | 0.042244  |
| 66 | km_45   | 0.092     | 2.60E-06   | 0.025296 | 0.025464  | 0.03401   | -1.23E-05  | -0.010526 |
| 67 | vm_45   | 1.7       | -2.40E-06  | 0.016611 | -0.010711 | -0.019648 | 1.24E-05   | -0.005837 |
| 68 | kf_46   | 6         | -3.06E-07  | 0.015403 | 0.029552  | 0.005601  | -2.78E-07  | 0.015314  |
| 69 | kb_46   | 12        | 1.04E-07   | 0.020258 | -0.010916 | 0.029996  | 1.07E-07   | 0.036318  |
| 70 | kf_47   | 3         | -1.73E-07  | 0.042033 | -0.020752 | 0.004163  | -1.85E-07  | -0.01643  |
| 71 | kb_47   | 0.3       | 1.90E-07   | 0.019009 | -0.004889 | 0.000489  | 1.92E-07   | -0.023401 |
| 72 | kf_48   | 2.0408    | -3.40E-07  | 0.016039 | -0.012581 | 0.014474  | -3.35E-07  | -0.021143 |
| 73 | kb_48   | 4.2       | 1.57E-07   | 0.029244 | -0.027622 | -0.061275 | 1.43E-07   | -0.01159  |
| 74 | kf_49   | 3.5261    | -1.20E-08  | 0.018756 | -0.029149 | -0.055838 | 9.84E-08   | 0.003425  |
| 75 | kf_50   | 0.9597    | 1.53E-07   | 0.016205 | 0.012683  | -0.029933 | 4.76E-08   | -0.029584 |
| 76 | kf_51   | 1200      | -3.09E-07  | 0.021994 | -0.02335  | 0.005884  | -3.03E-07  | 0.008312  |
| 77 | kb_51   | 4         | 8.34E-08   | 0.028978 | -0.016963 | -0.04249  | 5.10E-08   | 0.013871  |
| 78 | kcat_52 | 1         | -7.09E-08  | 0.023352 | -0.009594 | -0.012118 | 8.66E-09   | 0.002017  |
| 79 | kf_53   | 12        | 2.82E-07   | 0.026666 | -0.045314 | -0.077526 | 3.12E-07   | 0.01637   |
| 80 | kb_53   | 0.65      | 3.31E-08   | 0.042162 | 0.002515  | -0.012459 | 5.69E-08   | 0.020096  |
| 81 | kcat_54 | 2         | 6.71E-08   | 0.030469 | 0.010531  | -0.011082 | 1.02E-07   | -0.020774 |
| 82 | kf_55   | 2.4       | 0.084507   | 0.067528 | 0.21466   | 2.0514    | 0.057408   | 0.21748   |
| 83 | kb_55   | 4         | -0.067551  | 0.043507 | -0.13647  | -0.99112  | -0.047301  | -0.14495  |
| 84 | kcat_56 | 1         | 0.07204    | 0.088226 | 0.15297   | 2.2352    | 0.049755   | 0.15322   |
| 85 | kf_57   | 2.7238333 | -0.0002458 | 0.03567  | 0.023539  | 0.059673  | -0.0003869 | 0.047195  |
| 86 | kb_57   | 1.8372    | 0.0003112  | 0.034905 | -0.013382 | -0.066059 | 0.0003838  | -0.025567 |
| 87 | kf_58   | 1         | 0.059796   | 0.033322 | 0.15621   | 1.5302    | 0.046601   | 0.14802   |
| 88 | kb_58   | 0.05      | -0.056217  | 0.067657 | -0.13204  | -1.467    | -0.046559  | -0.11973  |
| 89 | kf_59   | 222       | -0.053608  | 0.054183 | -0.16429  | -1.479    | -0.041738  | -0.14247  |
| 90 | kb_59   | 3.68      | 0.042794   | 0.018876 | 0.085365  | 0.73743   | 0.033346   | 0.090356  |
| 91 | kcat_60 | 0.926     | -0.065972  | 0.087676 | -0.14135  | -0.91761  | -0.053069  | -0.13675  |
| 92 | kf_61   | 0.05      | 0.16555    | 0.15072  | 0.31814   | 2.6254    | 0.13034    | 0.2806    |
| 93 | kb_61   | 1         | -0.16503   | 0.1301   | -0.29333  | -2.6232   | -0.13034   | -0.30855  |
| 94 | kf_62   | 200       | 1.65E-05   | 0.014152 | 0.040494  | 0.079545  | -9.12E-05  | 0.014737  |
| 95 | kb_62   | 0.6333    | -2.20E-06  | 0.031056 | -0.017738 | -0.023986 | 1.23E-05   | -0.033858 |
| 96 | kcat_63 | 4         | 0.0047462  | 0.030768 | 0.012046  | 0.14859   | 0.0039523  | 0.051016  |

|     |         |        |            |          |           |           |            |           |
|-----|---------|--------|------------|----------|-----------|-----------|------------|-----------|
| 97  | kf_64   | 52     | -0.0006759 | 0.066439 | -0.15653  | 0.15303   | 0.0009184  | -0.099227 |
| 98  | kb_64   | 0.54   | 0.0002757  | 0.046968 | 0.018127  | 1.1699    | 0.0001216  | 0.033951  |
| 99  | kcat_65 | 4      | -0.010009  | 0.037886 | -0.092374 | -0.057761 | -0.0072862 | -0.090736 |
| 100 | kdeg_66 | 0.021  | -1.46E-06  | 0.031987 | 0.010141  | -0.76679  | -2.42E-06  | 0.011001  |
| 101 | kdeg_67 | 0.0225 | -0.0012852 | 0.031137 | -0.040575 | -0.38332  | -0.0027138 | -0.009067 |
| 102 | km_68   | 0.05   | -1.55E-05  | 0.044846 | 0.001108  | -0.25419  | -6.72E-06  | -0.040297 |
| 103 | vm_68   | 0.48   | 0.0025718  | 0.055777 | 0.17255   | 0.50494   | 0.006883   | 0.15701   |
| 104 | kf_69   | 0.45   | 0.0021416  | 0.039427 | 0.052864  | 0.47996   | 0.0034885  | 0.047312  |
| 105 | kb_69   | 0.226  | -3.88E-05  | 0.027736 | 0.002461  | -0.30246  | -2.23E-05  | -0.005787 |
| 106 | kf_70   | 9.9    | 0.0003948  | 0.036398 | -0.036564 | -0.91618  | 0.0003122  | 0.00214   |
| 107 | kb_70   | 0.005  | -1.88E-05  | 0.038958 | 0.022158  | -0.001745 | -1.49E-05  | -0.001318 |
| 108 | kf_71   | 0.25   | -0.15838   | 0.13601  | -0.36002  | -2.9114   | -0.13316   | -0.32298  |
| 109 | kf_72   | 0.08   | 0.0031314  | 0.02923  | 0.10845   | 0.57407   | 0.0022836  | 0.091192  |
| 110 | kb_72   | 0.033  | -0.0004375 | 0.020573 | -0.019816 | -0.10206  | -0.0003232 | -0.019927 |
| 111 | kcat_73 | 0.2    | 0.0007472  | 0.027924 | 0.015986  | 0.11354   | 0.0005423  | 0.011046  |
| 112 | kf_74   | 1.5    | 0.0010712  | 0.018398 | 0.036148  | 0.28172   | 0.0006921  | 0.027498  |
| 113 | kb_74   | 16     | -0.0008564 | 0.026341 | -0.03477  | -0.24441  | -0.0005534 | -0.05821  |
| 114 | kcat_75 | 4      | 0.000915   | 0.038077 | 0.036829  | 0.24458   | 0.0005978  | 0.022197  |
| 115 | kf_76   | 1.3125 | 0.0005638  | 0.019033 | 0.009826  | 0.018185  | 0.0004701  | 0.019829  |
| 116 | kb_76   | 100    | -0.0004493 | 0.024594 | -0.01473  | -0.00582  | -0.0003747 | -0.008242 |
| 117 | kcat_77 | 25     | 0.0004487  | 0.037734 | 0.025288  | 0.001449  | 0.0003741  | -0.017991 |
| 118 | kf_78   | 0.1    | -0.0010568 | 0.025383 | -0.045759 | -0.31922  | -0.0007359 | -0.024292 |
| 119 | kf_79   | 0.1    | -0.0005553 | 0.028063 | -0.007982 | -0.005937 | -0.0004674 | -0.037156 |
| 120 | kf_80   | 0.25   | -0.020501  | 0.049154 | -0.030604 | -0.61675  | -0.018605  | -0.055916 |
| 121 | kb_80   | 3.92   | 0.016446   | 0.033186 | 0.03353   | 0.23343   | 0.015383   | 0.036008  |
| 122 | kcat_81 | 0.98   | -0.015035  | 0.023076 | -0.039594 | -0.20713  | -0.013901  | -0.036685 |
| 123 | kf_82   | 0.041  | 0.017463   | 0.057226 | 0.041368  | 0.23883   | 0.015355   | 0.037553  |
| 124 | kf_83   | 2.1666 | -0.0008646 | 0.028601 | -0.021954 | -0.074246 | -0.0007075 | 0.010554  |
| 125 | kb_83   | 1      | 7.86E-05   | 0.0335   | -0.002537 | 0.005102  | 6.45E-05   | -0.000459 |
| 126 | kcat_84 | 10     | -7.73E-05  | 0.034494 | -0.006884 | -0.00454  | -6.32E-05  | -0.008214 |
| 127 | kf_85   | 100    | 0.1706     | 0.17984  | 0.37923   | 3.1422    | 0.14257    | 0.38261   |
| 128 | kb_85   | 2      | -0.044226  | 0.082439 | -0.21159  | -1.42     | -0.037753  | -0.20289  |
| 129 | kf_86   | 8      | 0.058344   | 0.13731  | 0.29131   | 1.6454    | 0.052247   | 0.27129   |
| 130 | kb_86   | 0.0444 | -0.0006361 | 0.012261 | 0.024898  | -0.030974 | -0.0005144 | 0.013967  |
| 131 | kcat_87 | 4      | 0.020687   | 0.02238  | 0.041833  | 0.24231   | 0.016645   | 0.048821  |
| 132 | kf_88   | 2.5    | -2.84E-07  | 0.021931 | -0.006838 | 0.003138  | -2.73E-07  | -0.000347 |
| 133 | kb_88   | 4      | 9.06E-08   | 0.029569 | 0.002431  | 0.002751  | 7.60E-08   | -0.002636 |
| 134 | kcat_89 | 1      | -1.46E-07  | 0.035084 | 0.005132  | 0.004996  | -1.61E-07  | -0.017665 |
| 135 | kf_90   | 12.85  | 2.03E-07   | 0.026895 | -0.007505 | 4.76E-07  | 2.29E-07   | 0.004556  |
| 136 | kb_90   | 9      | -8.18E-08  | 0.024841 | 0.007525  | 0.003813  | -8.72E-08  | 0.014412  |
| 137 | kcat_91 | 3      | 1.02E-07   | 0.017775 | -0.005111 | 0.002428  | 1.10E-07   | 0.004818  |
| 138 | kf_92   | 0.89   | -2.13E-10  | 0.03496  | -0.002488 | 0.003616  | 4.11E-08   | 0.009263  |
| 139 | kb_92   | 2      | -3.65E-08  | 0.036712 | -0.03837  | 0.005026  | -2.41E-08  | -0.008294 |
| 140 | kcat_93 | 0.5    | 6.30E-08   | 0.020813 | -0.006537 | 0.006241  | 5.52E-08   | 0.004558  |
| 141 | kf_94   | 9.88   | 8.07E-05   | 0.030187 | 0.01203   | 0.0027    | 8.88E-05   | -0.021754 |
| 142 | kb_94   | 13.6   | -6.45E-05  | 0.025656 | 0.024208  | -0.003039 | -7.10E-05  | 0.000941  |
| 143 | kcat_95 | 3.4    | 8.23E-05   | 0.021207 | -0.006336 | 0.001455  | 9.06E-05   | 0.006671  |
| 144 | kf_96   | 2.2    | -0.0012373 | 0.019476 | -0.045117 | -0.051256 | -0.0010168 | 0.007938  |
| 145 | kb_96   | 16     | 0.0009899  | 0.02722  | 0.011317  | 0.017039  | 0.0008136  | 0.03118   |
| 146 | kcat_97 | 4      | -0.000972  | 0.044008 | -6.93E-05 | -0.025903 | -0.000804  | 0.025397  |

|     |          |         |            |          |           |           |            |           |
|-----|----------|---------|------------|----------|-----------|-----------|------------|-----------|
| 147 | kf_98    | 90      | 2.51E-06   | 0.025577 | 0.015559  | -0.025799 | -1.25E-05  | 0.012253  |
| 148 | kb_98    | 0.00034 | 6.26E-06   | 0.048208 | 0.012356  | -0.009749 | 5.95E-06   | -0.000387 |
| 149 | kf_99    | 10      | -0.0016795 | 0.020295 | 0.14018   | 0.69939   | 0.0032466  | 0.1432    |
| 150 | kb_99    | 16      | 0.0008394  | 0.041507 | -0.098647 | -0.13161  | -0.0020411 | -0.096032 |
| 151 | kcat_100 | 4       | 0.0046884  | 0.040482 | 0.13839   | 0.62902   | 0.013448   | 0.097011  |
| 152 | kf_101   | 3       | -0.28775   | 0.27431  | -0.53628  | -4.1607   | -0.23837   | -0.51013  |
| 153 | kb_101   | 4       | 0.14384    | 0.13875  | 0.25064   | 2.065     | 0.11919    | 0.28641   |
| 154 | kcat_102 | 4       | -0.13735   | 0.13974  | -0.25901  | -2.0457   | -0.11344   | -0.25337  |
| 155 | kf_103   | 6.8     | 0.084216   | 0.13803  | 0.30069   | 2.04      | 0.051161   | 0.28427   |
| 156 | kb_103   | 9.62    | -0.067372  | 0.085683 | -0.23344  | -1.6206   | -0.040931  | -0.20989  |
| 157 | kcat_104 | 2.405   | 0.068277   | 0.086782 | 0.21866   | 1.6508    | 0.041463   | 0.23179   |
| 158 | kf_105   | 6.8     | 0.25104    | 0.19112  | 0.37532   | 2.4397    | 0.22869    | 0.36726   |
| 159 | kb_105   | 9.62    | -0.20082   | 0.12102  | -0.27515  | -1.9073   | -0.18295   | -0.28955  |
| 160 | kcat_106 | 2.405   | 0.20293    | 0.15362  | 0.25556   | 1.9228    | 0.18482    | 0.27306   |
| 161 | kf_107   | 2       | -0.0030366 | 0.020352 | -0.043678 | 1.2685    | -0.002793  | -0.055079 |
| 162 | kb_107   | 8       | 0.0022751  | 0.021267 | 0.029998  | 0.51711   | 0.002093   | 0.03207   |
| 163 | kcat_108 | 2.667   | -0.0026499 | 0.029568 | -0.002955 | 1.4809    | -0.0024564 | -0.017403 |
| 164 | kf_109   | 0.333   | 0.0032352  | 0.022589 | 0.025321  | 0.63201   | 0.0030952  | 0.052559  |
| 165 | kf_110   | 1       | -0.075606  | 0.056745 | -0.056998 | -0.77733  | -0.073326  | -0.10843  |
| 166 | kb_110   | 4.64    | 0.060485   | 0.059167 | 0.093508  | 0.51967   | 0.058661   | 0.087935  |
| 167 | kcat_111 | 1.16    | -0.061842  | 0.044281 | -0.040174 | -0.53032  | -0.060068  | -0.084478 |
| 168 | kf_112   | 15      | 0.076617   | 0.083297 | 0.085802  | 0.78986   | 0.075052   | 0.089444  |
| 169 | kb_112   | 16      | -0.061293  | 0.03127  | -0.036926 | -0.5291   | -0.060042  | -0.046627 |
| 170 | kcat_113 | 4       | 0.060895   | 0.05477  | 0.061596  | 0.53001   | 0.059627   | 0.065627  |
| 171 | kf_114   | 1.31    | -0.070998  | 0.054035 | -0.10887  | -0.49226  | -0.073514  | -0.13775  |
| 172 | kb_114   | 4       | 0.056792   | 0.035797 | 0.064997  | 0.40359   | 0.058811   | 0.10523   |
| 173 | kcat_115 | 1       | -0.055765  | 0.059567 | -0.068876 | -0.3949   | -0.0578    | -0.073666 |
| 174 | kf_116   | 1.31    | -0.017696  | 0.053137 | 0.083994  | 0.61501   | -0.016094  | 0.096386  |
| 175 | kb_116   | 4       | 0.014156   | 0.042247 | -0.16965  | -1.3698   | 0.012875   | -0.17224  |
| 176 | kcat_117 | 1       | -0.013832  | 0.037863 | -0.076313 | -0.64973  | -0.012591  | -0.096726 |
| 177 | kf_118   | 26      | -0.14849   | 0.078676 | -0.10598  | -1.2496   | -0.15527   | -0.13409  |
| 178 | kb_118   | 64      | 0.11879    | 0.059039 | 0.09988   | 0.56563   | 0.12422    | 0.091137  |
| 179 | kcat_119 | 16      | -0.11979   | 0.059495 | -0.055217 | -0.56153  | -0.12532   | -0.095375 |
| 180 | kf_120   | 26      | -0.03666   | 0.031977 | -0.051822 | -0.37643  | -0.033821  | -0.044329 |
| 181 | kb_120   | 64      | 0.029328   | 0.034419 | 0.067018  | 0.24551   | 0.027057   | 0.063881  |
| 182 | kcat_21  | 16      | -0.029635  | 0.047234 | -0.069218 | -0.25026  | -0.027357  | -0.047819 |
| 183 | kf_122   | 1.6     | -0.080765  | 0.0698   | -0.10175  | -0.5927   | -0.068192  | -0.098153 |
| 184 | kb_122   | 1       | 0.06458    | 0.052491 | 0.055008  | 0.44854   | 0.054201   | 0.074379  |
| 185 | kcat_123 | 0.25    | 0.071661   | 0.048263 | 0.059197  | 0.20813   | 0.069415   | 0.065595  |
| 186 | kf_124   | 1.6     | -0.054872  | 0.030285 | -0.032202 | -0.11154  | -0.053369  | -0.039879 |
| 187 | kb_124   | 1       | 0.043874   | 0.020189 | 0.014454  | 0.089205  | 0.042697   | 0.017726  |
| 188 | kcat_125 | 0.25    | 0.097726   | 0.030194 | 0.076255  | 0.27107   | 0.10312    | 0.077188  |
| 189 | kf_126   | 0.0004  | -0.0057482 | 0.025099 | -0.005144 | -0.016928 | -0.0045085 | 0.007136  |
| 190 | kb_126   | 0.0001  | 0.0036841  | 0.019477 | -0.024192 | 0.014355  | 0.0032128  | -0.023242 |
| 191 | kf_127   | 0.0004  | -0.010006  | 0.025682 | -0.034882 | -0.10484  | -0.0077134 | -0.031745 |
| 192 | kb_127   | 0.0001  | 0.0054678  | 0.016531 | 0.016799  | 0.090767  | 0.0041986  | -0.013104 |
| 193 | kf_128   | 3.7E-16 | -5.94E-08  | 0.025976 | 0.002486  | 0.000225  | -8.90E-08  | 0.000169  |
| 194 | kf_129   | 3.7E-16 | 1.45E-07   | 0.015293 | 0.036646  | -0.000275 | 1.98E-07   | -0.000896 |
| 195 | kf_130   | 0.30101 | -0.034466  | 0.023344 | -0.028005 | -0.029255 | -0.037925  | -0.008014 |
| 196 | kb_130   | 4.44    | 0.023048   | 0.025675 | -0.002783 | 0.024428  | 0.024193   | 0.023683  |



|     |          |          |            |          |           |           |            |           |
|-----|----------|----------|------------|----------|-----------|-----------|------------|-----------|
| 197 | kcat_131 | 2.2      | -0.023386  | 0.021914 | -0.001845 | -0.024469 | -0.02457   | 0.019003  |
| 198 | kb_132   | 108      | -0.026781  | 0.023778 | 0.006384  | -0.015103 | -0.028865  | 0.006609  |
| 199 | kf_132   | 141      | 0.033471   | 0.034785 | -0.003464 | 0.026385  | 0.037825   | 0.001857  |
| 200 | kcat_133 | 27       | 0.026747   | 0.032376 | 0.000972  | 0.015405  | 0.028827   | -0.030914 |
| 201 | kf_134   | 76       | -0.008096  | 0.04845  | -0.00934  | -0.014447 | -0.010422  | -0.020146 |
| 202 | kb_134   | 4        | 0.0057399  | 0.023857 | -0.015157 | 0.005245  | 0.0037814  | 4.92E-06  |
| 203 | kcat_135 | 1        | -0.025795  | 0.041152 | -0.028786 | -0.044778 | -0.029344  | -0.011677 |
| 204 | kf_136   | 76       | 0.0013348  | 0.02104  | 0.008073  | -0.000529 | 0.003683   | -0.015132 |
| 205 | kb_136   | 4        | -0.0011046 | 0.048719 | -0.004518 | -0.000627 | -0.0034481 | 0.012515  |
| 206 | kcat_137 | 1        | -0.01777   | 0.018143 | -0.033046 | -0.021765 | -0.019217  | -0.022748 |
| 207 | kf_138   | 1        | -0.002673  | 0.019801 | -0.007835 | -0.006778 | -0.0028333 | -0.004818 |
| 208 | kb_138   | 0.25     | 7.23E-05   | 0.014837 | -0.014085 | 0.000532  | 7.66E-05   | 0.002946  |
| 209 | kcat_139 | 9        | -0.001431  | 0.022593 | 0.025262  | -0.001424 | -0.0016791 | -0.026943 |
| 210 | kf_140   | 1        | -0.0012223 | 0.022736 | 0.024223  | -0.005078 | -0.0012274 | -0.009059 |
| 211 | kb_140   | 0.25     | 3.32E-05   | 0.025104 | 0.000754  | 0.006616  | 3.33E-05   | 0.016889  |
| 212 | kcat_141 | 9        | -0.0012958 | 0.036893 | 0.005492  | -0.00332  | -0.0014189 | -0.026456 |
| 213 | kf_142   | 1E-18    | -7.49E-08  | 0.024645 | -0.004358 | -3.80E-06 | -1.32E-07  | 0.003162  |
| 214 | kf_143   | 1E-18    | 8.64E-08   | 0.021896 | 0.00768   | 0.000742  | 9.91E-08   | -0.008422 |
| 215 | kf_144   | 0.05     | -0.0002234 | 0.028846 | -0.008331 | -0.001035 | -0.0002452 | 0.000469  |
| 216 | kb_144   | 2        | 0.0001786  | 0.040474 | 0.016558  | -0.000351 | 0.0001961  | 0.007956  |
| 217 | kcat_145 | 0.5      | -5.40E-05  | 0.039206 | -0.002028 | -0.000655 | -5.95E-05  | 0.004906  |
| 218 | kf_146   | 2.25     | -1.12E-07  | 0.022574 | 0.018009  | 0.00159   | -1.71E-07  | 0.009926  |
| 219 | kb_147   | 8        | -6.86E-08  | 0.020701 | -0.027488 | 0.01021   | -1.05E-07  | -0.009306 |
| 220 | kcat_147 | 4        | -1.50E-07  | 0.03858  | -0.012577 | -0.007866 | -1.70E-07  | 0.027756  |
| 221 | kf_148   | 1        | 0.079646   | 0.068924 | 0.12061   | 0.7409    | 0.062357   | 0.090164  |
| 222 | kf_149   | 10       | 0.0071355  | 0.039084 | 0.049115  | -0.99418  | 0.016586   | 0.0344    |
| 223 | kb_149   | 2        | -0.0033108 | 0.027599 | -0.021312 | 1.6064    | -0.0002372 | -0.016419 |
| 224 | kf_150   | 83       | -0.0088509 | 0.029732 | -0.030353 | -0.58671  | -0.0064601 | -0.060096 |
| 225 | kb_150   | 2.77     | 0.0064875  | 0.037419 | 0.031823  | -0.00091  | 0.0047456  | 0.004328  |
| 226 | kcat_151 | 1        | -0.013847  | 0.046059 | -0.06453  | -0.31664  | -0.012329  | -0.050558 |
| 227 | kf_152   | 240      | -6.56E-05  | 0.01935  | -0.04165  | -0.031782 | -5.30E-05  | 0.006149  |
| 228 | kb_152   | 2        | 4.68E-05   | 0.039969 | 0.008003  | 0.06267   | 3.78E-05   | -0.020358 |
| 229 | kcat_153 | 1        | -0.000167  | 0.0297   | 0.015396  | -0.018814 | -0.0001344 | -0.008286 |
| 230 | km_154   | 0.050505 | -0.10684   | 0.087358 | -0.18936  | -1.5772   | -0.085552  | -0.20989  |
| 231 | vm_154   | 22       | 0.16694    | 0.12677  | 0.3109    | 2.6449    | 0.13152    | 0.30177   |
| 232 | kf_155   | 450      | -0.043964  | 0.038956 | 0.01054   | -0.08083  | -0.048177  | -0.016164 |
| 233 | kb_155   | 600      | 0.035171   | 0.016977 | -0.021424 | 0.062297  | 0.038541   | 0.021694  |
| 234 | kcat_156 | 150      | -0.039483  | 0.031823 | -0.024057 | -0.13797  | -0.043447  | -0.008861 |
| 235 | kf_157   | 450      | -0.025062  | 0.026409 | -0.006232 | -0.018867 | -0.029313  | -0.042677 |
| 236 | kb_157   | 600      | 0.019712   | 0.027853 | -0.016527 | 0.015241  | 0.023188   | 0.001388  |
| 237 | kcat_158 | 150      | -0.023517  | 0.047143 | 0.00717   | -0.017892 | -0.027396  | 0.002912  |
| 238 | kf_159   | 30       | -0.0032042 | 0.025583 | 0.003402  | -0.002411 | -0.0033118 | 0.007436  |
| 239 | kb_159   | 600      | 0.0025633  | 0.014072 | -0.005176 | 0.002849  | 0.0026494  | 0.001563  |
| 240 | kcat_160 | 150      | -0.0028585 | 0.020103 | -0.000807 | -0.005655 | -0.0029817 | 0.0076    |
| 241 | kf_161   | 30       | -0.00198   | 0.024936 | 0.016092  | 0.002387  | -0.0018715 | 0.029912  |
| 242 | kb_161   | 600      | 0.0015841  | 0.02843  | -0.033539 | -0.003241 | 0.0014973  | 0.019732  |
| 243 | kcat_162 | 150      | -0.0018492 | 0.025495 | -0.029315 | -0.003998 | -0.0017808 | -0.007019 |
| 244 | kf_163   | 4        | -1.25E-06  | 0.034533 | 0.002698  | 0.007176  | -1.19E-06  | -0.030927 |
| 245 | kb_163   | 0.000335 | 1.66E-07   | 0.018618 | -0.00263  | 0.000448  | 1.67E-07   | 0.0162    |
| 246 | kcat_164 | 1        | -1.24E-05  | 0.030777 | 0.006325  | 0.001464  | -1.17E-07  | -0.010511 |

|     |           |           |            |          |           |           |            |           |
|-----|-----------|-----------|------------|----------|-----------|-----------|------------|-----------|
| 247 | kf_165    | 0.0001    | -6.83E-05  | 0.018888 | -0.00406  | -0.00023  | -7.05E-06  | -0.002669 |
| 248 | kb_165    | 0.0002    | 4.15E-06   | 0.022969 | -0.006545 | 7.70E-05  | 3.56E-08   | -0.01371  |
| 249 | kf_166    | 1E-25     | 0          | 0.039454 | 0.021777  | 4.25E-08  | 0          | 0.002925  |
| 250 | trnsc_167 | 0.0000002 | -2.08E-05  | 0.018938 | -0.017971 | -0.000206 | -2.19E-06  | -0.016251 |
| 251 | trnsc_168 | 0.000002  | -4.95E-05  | 0.020271 | 0.021407  | -0.000137 | -4.85E-06  | -0.004812 |
| 252 | kf_169    | 0.1       | -0.0035418 | 0.079119 | -0.1901   | -0.69458  | -0.0030874 | -0.15644  |
| 253 | kf_170    | 0.0034    | 0.0063752  | 0.025977 | 0.008179  | 0.009153  | 0.003166   | -0.016343 |
| 254 | kb_170    | 1         | -0.0050946 | 0.033084 | -0.00499  | -0.003123 | -0.0025264 | -0.004438 |
| 255 | kcat_171  | 0.25      | 0.0050673  | 0.027004 | -0.00502  | 0.00326   | 0.0024941  | 0.019901  |
| 256 | kf_172    | 1.5E-15   | 0          | 0.031695 | 0.003677  | 0         | 0          | 0.005965  |

## 5. Parameter Sensitivities for ppERK response:

| Sr. No. | Parameter |           | Integrated response |          |           |           | Maximum Response |           |
|---------|-----------|-----------|---------------------|----------|-----------|-----------|------------------|-----------|
|         |           |           | LSA                 | MPSA     | PRCC      | WALS      | LSA              | PRCC      |
| 1       | kon_1     | 50        | -0.0002445          | 0.028809 | 0.026461  | -0.62101  | -0.017606        | 0.012334  |
| 2       | koff_1    | 10        | -0.013296           | 0.037958 | -0.033887 | 0.76302   | -0.024822        | -0.013979 |
| 3       | kf_2      | 0.99      | 0.029204            | 0.043819 | 0.070292  | 2.2845    | 0.020365         | 0.081712  |
| 4       | kon_3     | 0.8857    | 0.037552            | 0.065934 | 0.10865   | 2.4007    | 0.037694         | 0.097706  |
| 5       | koff_3    | 0.8766    | -0.025257           | 0.041595 | -0.092315 | 0.83788   | -0.017666        | -0.04944  |
| 6       | kcat_4    | 0.515     | 0.028499            | 0.046031 | 0.096054  | 2.3485    | 0.032711         | 0.058961  |
| 7       | kon_5     | 7         | -0.022215           | 0.029844 | -0.11401  | -0.15307  | -0.018594        | -0.10919  |
| 8       | koff_5    | 7.9716    | 0.017748            | 0.049554 | 0.084544  | 0.96652   | 0.01486          | 0.063383  |
| 9       | kcat_6    | 2         | -0.019224           | 0.038369 | -0.075128 | -1.6353   | -0.016067        | -0.066618 |
| 10      | km_7      | 1.933     | 0.01182             | 0.02282  | 0.05168   | 0.61933   | 0.02376          | 0.10261   |
| 11      | vm_7      | 5.4291    | -0.012374           | 0.028449 | -0.10304  | -0.54861  | -0.023876        | -0.073504 |
| 12      | kf_8      | 0.7532    | -0.019288           | 0.066175 | -0.12033  | -1.611    | -0.027851        | -0.10627  |
| 13      | kb_8      | 1.201     | 0.014022            | 0.051081 | 0.054348  | -1.7142   | 0.012024         | 0.068158  |
| 14      | kcat_9    | 0.9426    | -0.014758           | 0.060674 | -0.066793 | -1.0386   | -0.012419        | -0.05681  |
| 15      | kf_10     | 0.01      | 0.012677            | 0.069115 | 0.086093  | 1.0282    | 0.010086         | 0.12424   |
| 16      | kf_11     | 0.0943    | 0.011214            | 0.02936  | 0.08423   | 2.8871    | 0.010491         | 0.023539  |
| 17      | kb_12     | 8.7948    | -0.016332           | 0.055243 | -0.099299 | 0.094175  | -0.026003        | -0.09638  |
| 18      | kf_12     | 0.448     | 0.053245            | 0.061226 | 0.24421   | 4.0278    | 0.057128         | 0.19438   |
| 19      | kcat_13   | 21.56515  | 0.016662            | 0.044864 | 0.0879    | 1.4256    | 0.026035         | 0.10032   |
| 20      | kf_14     | 20        | -0.031654           | 0.085495 | -0.17647  | -2.7199   | -0.02746         | -0.17125  |
| 21      | kb_14     | 3.6       | 0.02689             | 0.045941 | 0.12013   | 1.31      | 0.023202         | 0.12074   |
| 22      | kcat_15   | 0.9       | -0.035105           | 0.029841 | -0.14359  | -1.9659   | -0.029954        | -0.13075  |
| 23      | kf_16     | 0.3143    | -5.61E-05           | 0.032611 | 0.010196  | 0.034926  | -3.58E-05        | 0.012822  |
| 24      | kb_16     | 1.2092    | 4.43E-05            | 0.026161 | -0.007907 | -0.11423  | 2.89E-05         | -0.041825 |
| 25      | kcat_17   | 0.3023    | 0.0001804           | 0.027664 | 0.0129    | 0.070179  | 0.000127         | -0.031577 |
| 26      | kf_18     | 0.899     | 0.0001617           | 0.030214 | 0.034899  | 0.10011   | 0.0001103        | 0.002745  |
| 27      | kb_18     | 0.8766    | -8.79E-05           | 0.044642 | 0.002813  | -0.05821  | -5.95E-05        | 0.021482  |
| 28      | kcat_19   | 0.6915    | 0.0001009           | 0.04945  | 0.012044  | -0.044509 | 6.68E-05         | -0.028309 |
| 29      | kf_20     | 0.0000015 | 4.52E-05            | 0.035748 | 0.013892  | -0.089061 | 1.98E-05         | -0.023059 |
| 30      | kf_21     | 0.0000015 | -8.92E-06           | 0.032903 | -0.009045 | -0.021167 | -4.21E-06        | 0.020638  |
| 31      | kon_22    | 10        | 0.016718            | 0.022684 | 0.027805  | -1.5481   | -0.010061        | -0.016245 |
| 32      | koff_22   | 5         | -0.0061032          | 0.015857 | -0.057207 | -0.16041  | 0.014325         | -0.053021 |
| 33      | kf_23     | 0.0067    | -0.0031786          | 0.032803 | -0.009517 | -0.11561  | -0.0014218       | -0.034756 |
| 34      | kf_24     | 0.645     | -5.20E-05           | 0.024062 | -0.019888 | -0.032664 | -1.72E-05        | -0.012984 |
| 35      | kb_24     | 4         | 4.27E-05            | 0.028343 | 0.01981   | -0.020297 | 1.45E-05         | 0.005783  |
| 36      | kcat_25   | 1         | 4.29E-05            | 0.031602 | -0.038037 | -0.005075 | 3.52E-05         | 0.01481   |
| 37      | kf_26     | 2.4       | -0.0001421          | 0.032294 | 0.02882   | -0.002188 | -2.39E-05        | 0.006386  |
| 38      | kb_26     | 4         | 7.23E-05            | 0.050997 | -0.017031 | -0.11756  | 1.36E-05         | -0.013936 |
| 39      | kcat_27   | 4         | 0.0003277           | 0.029872 | -0.000645 | 0.022896  | 0.0002733        | 0.01185   |
| 40      | kf_28     | 12        | -0.0001684          | 0.032988 | -0.009724 | -0.14032  | -0.0002208       | -0.044585 |
| 41      | kb_28     | 16        | 0.0001356           | 0.046363 | 0.030938  | 0.053232  | 0.0001772        | 0.045402  |
| 42      | kcat_29   | 4         | -0.000137           | 0.017666 | 0.005302  | -0.11777  | -0.0001769       | -0.026617 |
| 43      | kf_30     | 1.2245    | -0.0001875          | 0.023575 | 0.000737  | 0.008316  | -4.15E-05        | 0.041443  |
| 44      | kb_30     | 12        | 0.0001497           | 0.034648 | -0.00058  | -0.1084   | 3.28E-05         | 0.007748  |
| 45      | kcat_31   | 3         | 5.47E-05            | 0.044839 | -0.004813 | -0.034193 | 1.43E-05         | -0.003995 |
| 46      | kf_32     | 0.00345   | 1.17E-07            | 0.027396 | 0.013584  | -0.06081  | 4.05E-07         | 0.011528  |

|    |         |           |            |          |           |           |            |           |
|----|---------|-----------|------------|----------|-----------|-----------|------------|-----------|
| 47 | kb_32   | 1.064     | 1.34E-06   | 0.031035 | 0.00394   | -0.029683 | 1.91E-06   | -0.01559  |
| 48 | kf_33   | 0.2       | 1.58E-07   | 0.030025 | -0.005198 | -0.005019 | 2.13E-07   | 0.007455  |
| 49 | kb_33   | 4         | -1.10E-06  | 0.028443 | 0.001403  | -0.036614 | -1.31E-06  | 0.004854  |
| 50 | kcat_34 | 1         | 7.97E-07   | 0.025558 | 0.013921  | -0.038737 | 6.81E-07   | 0.016181  |
| 51 | kf_35   | 4.8699    | -0.0005309 | 0.029976 | 0.010864  | -0.01151  | 8.22E-05   | 0.031565  |
| 52 | kb_36   | 14        | 0.0004241  | 0.024365 | 0.005003  | -0.10924  | -6.43E-05  | -0.002862 |
| 53 | kcat_36 | 3.5       | 0.0006703  | 0.054811 | 0.010381  | 0.19864   | 0.000559   | 0.02354   |
| 54 | kf_37   | 0.5       | 0.0002175  | 0.043737 | -0.01754  | -0.10398  | 0.0004934  | 0.009957  |
| 55 | kb_37   | 3         | -0.0001805 | 0.027335 | -0.055219 | -0.082433 | -0.0004116 | 0.002188  |
| 56 | kf_38   | 22        | 0.0001799  | 0.029679 | 0.013475  | 0.028661  | 0.0004175  | 0.001568  |
| 57 | kb_38   | 24        | -0.0001429 | 0.017521 | -0.006183 | 0.68237   | -0.0003317 | 0.004557  |
| 58 | kcat_39 | 6         | 0.0001427  | 0.032785 | 0.024032  | -0.17348  | 0.0003319  | -0.001322 |
| 59 | kf_40   | 22        | -0.0003898 | 0.025744 | -0.010387 | -0.049345 | -0.0004377 | -0.008283 |
| 60 | kb_40   | 8         | 0.0003135  | 0.043026 | 0.019113  | 0.16896   | 0.0003499  | -0.01864  |
| 61 | kcat_41 | 2         | -0.0003658 | 0.058979 | -0.010036 | -0.135    | -0.0004067 | 0.020006  |
| 62 | kf_42   | 0.1       | -1.49E-05  | 0.030025 | 0.019435  | -0.037675 | -5.91E-06  | -0.007831 |
| 63 | kf_43   | 0.251829  | -0.0001777 | 0.030205 | -0.00731  | 0.65728   | -0.0004724 | 0.017275  |
| 64 | km_44   | 0.00391   | 5.67E-07   | 0.040132 | 0.01029   | -0.076597 | 3.85E-07   | 0.006573  |
| 65 | vm_44   | 1.69      | 0.0002209  | 0.024724 | 0.018525  | -0.10296  | 0.0005185  | 0.046112  |
| 66 | km_45   | 0.092     | 0.0001335  | 0.023942 | 0.026203  | -0.3157   | 0.0003583  | -0.011317 |
| 67 | vm_45   | 1.7       | -0.0001321 | 0.024573 | -0.000698 | -0.14383  | -0.0003576 | -0.001056 |
| 68 | kf_46   | 6         | -2.83E-08  | 0.026188 | 0.025339  | -0.011709 | -2.65E-08  | 0.024912  |
| 69 | kb_46   | 12        | -1.09E-06  | 0.034182 | -0.00792  | 0.094806  | -1.06E-06  | 0.034152  |
| 70 | kf_47   | 3         | 8.64E-07   | 0.032132 | -0.01831  | -0.12595  | 8.31E-07   | -0.007892 |
| 71 | kb_47   | 0.3       | -6.63E-07  | 0.035256 | 0.002398  | 0.051062  | -4.80E-07  | -0.023768 |
| 72 | kf_48   | 2.0408    | -3.46E-07  | 0.029759 | -0.016615 | 0.042503  | -2.71E-07  | -0.035079 |
| 73 | kb_48   | 4.2       | -9.09E-08  | 0.032916 | -0.022552 | -0.19421  | 4.28E-09   | 0.004605  |
| 74 | kf_49   | 3.5261    | 1.07E-06   | 0.044505 | -0.015656 | -0.11011  | 1.19E-06   | 0.017419  |
| 75 | kf_50   | 0.9597    | -1.04E-06  | 0.02279  | 0.017271  | -0.17     | -1.38E-06  | -0.022626 |
| 76 | kf_51   | 1200      | -2.75E-07  | 0.025677 | -0.014492 | -0.082318 | -4.32E-07  | 0.00539   |
| 77 | kb_51   | 4         | -1.06E-06  | 0.027468 | -0.016605 | 0.099979  | -1.12E-06  | 0.024804  |
| 78 | kcat_52 | 1         | 1.07E-06   | 0.025539 | -0.020193 | 0.088256  | 1.46E-06   | 0.003447  |
| 79 | kf_53   | 12        | 4.86E-07   | 0.018353 | -0.043716 | -0.19348  | 8.77E-07   | 0.017494  |
| 80 | kb_53   | 0.65      | 4.96E-07   | 0.038382 | -0.006848 | -0.015141 | 6.25E-07   | 0.008709  |
| 81 | kcat_54 | 2         | -3.51E-07  | 0.032828 | -0.001809 | -0.053351 | -2.17E-07  | -0.022539 |
| 82 | kf_55   | 2.4       | 0.07698    | 0.055654 | 0.19513   | 4.4512    | 0.05042    | 0.19611   |
| 83 | kb_55   | 4         | -0.06144   | 0.038016 | -0.1235   | -1.8585   | -0.03912   | -0.13691  |
| 84 | kcat_56 | 1         | 0.065816   | 0.057549 | 0.14234   | 5.0224    | 0.041205   | 0.14063   |
| 85 | kf_57   | 2.7238333 | 8.12E-05   | 0.024065 | 0.025961  | 0.10239   | 0.0001975  | 0.046593  |
| 86 | kb_57   | 1.8372    | 7.80E-05   | 0.034293 | -0.016806 | 0.11506   | -0.000103  | -0.037334 |
| 87 | kf_58   | 1         | 0.053132   | 0.051447 | 0.15254   | 3.236     | 0.037963   | 0.12557   |
| 88 | kb_58   | 0.05      | -0.049398  | 0.062139 | -0.11943  | -3.2013   | -0.037943  | -0.10347  |
| 89 | kf_59   | 222       | -0.047834  | 0.053274 | -0.14956  | -3.2291   | -0.034439  | -0.13002  |
| 90 | kb_59   | 3.68      | 0.038179   | 0.018583 | 0.075944  | 1.5954    | 0.027512   | 0.094075  |
| 91 | kcat_60 | 0.926     | -0.058595  | 0.081336 | -0.13187  | -2.1264   | -0.043824  | -0.12428  |
| 92 | kf_61   | 0.05      | 0.14803    | 0.10632  | 0.27137   | 5.1205    | 0.10744    | 0.25726   |
| 93 | kb_61   | 1         | -0.14749   | 0.12379  | -0.26859  | -5.224    | -0.10744   | -0.28619  |
| 94 | kf_62   | 200       | 0.0002163  | 0.022522 | 0.039607  | 0.26265   | 0.0003602  | 0.028511  |
| 95 | kb_62   | 0.6333    | -2.98E-05  | 0.016266 | -0.023157 | -0.098571 | -4.91E-05  | -0.024949 |
| 96 | kcat_63 | 4         | 0.0043672  | 0.041945 | 0.005476  | 0.22407   | 0.0035218  | 0.034216  |

|     |         |        |            |          |           |           |            |           |
|-----|---------|--------|------------|----------|-----------|-----------|------------|-----------|
| 97  | kf_64   | 52     | 5.99E-05   | 0.035205 | -0.13772  | 0.46904   | -0.022427  | -0.095513 |
| 98  | kb_64   | 0.54   | 0.0003707  | 0.05392  | 0.016948  | 2.9354    | 0.0001391  | 0.034664  |
| 99  | kcat_65 | 4      | -0.012177  | 0.048138 | -0.089814 | -0.21082  | -0.028655  | -0.087768 |
| 100 | kdeg_66 | 0.021  | 9.99E-07   | 0.015493 | 0.014339  | -1.8644   | 3.46E-05   | 0.011219  |
| 101 | kdeg_67 | 0.0225 | -0.0012707 | 0.036186 | -0.040255 | -1.0649   | 0.0007081  | -0.009558 |
| 102 | km_68   | 0.05   | -2.08E-05  | 0.030612 | -0.001641 | -0.84935  | -7.88E-06  | -0.039796 |
| 103 | vm_68   | 0.48   | -3.62E-05  | 0.079658 | 0.15369   | 0.91051   | 0.037763   | 0.14547   |
| 104 | kf_69   | 0.45   | 0.0053411  | 0.02616  | 0.041075  | 0.85641   | 0.0073008  | 0.041524  |
| 105 | kb_69   | 0.226  | -4.77E-05  | 0.019626 | -0.002027 | -0.66447  | -2.55E-05  | -0.005121 |
| 106 | kf_70   | 9.9    | 0.0004216  | 0.028204 | -0.020798 | -2.5247   | 0.0003151  | 0.012773  |
| 107 | kb_70   | 0.005  | -1.98E-05  | 0.025571 | 0.015899  | 0.002089  | -1.50E-05  | -0.001149 |
| 108 | kf_71   | 0.25   | -0.14      | 0.10863  | -0.32322  | -5.8548   | -0.10986   | -0.29429  |
| 109 | kf_72   | 0.08   | 0.0028244  | 0.021912 | 0.10295   | 1.2201    | 0.0018739  | 0.075113  |
| 110 | kb_72   | 0.033  | -0.0003935 | 0.025749 | -0.024727 | -0.18577  | -0.0002644 | -0.01064  |
| 111 | kcat_73 | 0.2    | 0.0006747  | 0.022361 | 0.024372  | 0.20819   | 0.0004459  | 0.015187  |
| 112 | kf_74   | 1.5    | 0.0009799  | 0.041967 | 0.036463  | 0.60787   | 0.0005658  | 0.032853  |
| 113 | kb_74   | 16     | -0.0007819 | 0.035285 | -0.035968 | -0.54095  | -0.0004509 | -0.047424 |
| 114 | kcat_75 | 4      | 0.0008363  | 0.021386 | 0.03545   | 0.50757   | 0.0004889  | 0.011793  |
| 115 | kf_76   | 1.3125 | 0.0005004  | 0.035109 | 0.007812  | 0.002375  | 0.0003893  | 0.032591  |
| 116 | kb_76   | 100    | -0.0003974 | 0.03284  | -0.015232 | -0.033417 | -0.0003089 | -0.011406 |
| 117 | kcat_77 | 25     | 0.0003973  | 0.027027 | 0.041519  | -0.020758 | 0.0003086  | -0.015362 |
| 118 | kf_78   | 0.1    | -0.0009602 | 0.022207 | -0.046823 | -0.65068  | -0.0006039 | -0.014172 |
| 119 | kf_79   | 0.1    | -0.0004911 | 0.020128 | -0.008305 | -0.047855 | -0.0003859 | -0.024297 |
| 120 | kf_80   | 0.25   | -0.021578  | 0.044368 | -0.033144 | -1.6908   | -0.019764  | -0.056078 |
| 121 | kb_80   | 3.92   | 0.017749   | 0.02268  | 0.041171  | 0.57301   | 0.017055   | 0.036675  |
| 122 | kcat_81 | 0.98   | -0.013544  | 0.022676 | -0.046715 | -0.4124   | -0.0086007 | -0.033779 |
| 123 | kf_82   | 0.041  | 0.015469   | 0.055815 | 0.036387  | 0.56708   | 0.012956   | 0.03533   |
| 124 | kf_83   | 2.1666 | -0.0007684 | 0.026479 | -0.020361 | -0.15637  | -0.0005845 | 0.012846  |
| 125 | kb_83   | 1      | 7.00E-05   | 0.035623 | 0.01034   | -0.022543 | 5.36E-05   | 0.019967  |
| 126 | kcat_84 | 10     | -6.82E-05  | 0.024599 | 0.005106  | -0.005144 | -5.17E-05  | -0.000325 |
| 127 | kf_85   | 100    | 0.15104    | 0.14929  | 0.34641   | 6.2859    | 0.11765    | 0.34396   |
| 128 | kb_85   | 2      | -0.039331  | 0.072863 | -0.20153  | -2.3882   | -0.028121  | -0.1836   |
| 129 | kf_86   | 8      | 0.054611   | 0.086794 | 0.25403   | 3.0138    | 0.059179   | 0.24523   |
| 130 | kb_86   | 0.0444 | -0.0005707 | 0.017318 | 0.015633  | -0.096379 | -0.0004265 | 0.005264  |
| 131 | kcat_87 | 4      | 0.018453   | 0.028314 | 0.032361  | 0.45454   | 0.013748   | 0.048793  |
| 132 | kf_88   | 2.5    | -6.52E-07  | 0.032188 | -0.008738 | -0.045535 | -6.16E-07  | 0.014791  |
| 133 | kb_88   | 4      | -4.37E-07  | 0.022101 | 0.010248  | -0.034037 | -4.67E-07  | 0.002758  |
| 134 | kcat_89 | 1      | -6.39E-07  | 0.039788 | 0.006098  | -0.017179 | -7.01E-07  | -0.008887 |
| 135 | kf_90   | 12.85  | 1.03E-06   | 0.017699 | -0.006845 | -0.021427 | 1.10E-06   | 0.000575  |
| 136 | kb_90   | 9      | -2.33E-07  | 0.020025 | 0.004295  | 0.004025  | -2.76E-07  | 0.021784  |
| 137 | kcat_91 | 3      | 1.60E-07   | 0.016383 | -0.015047 | 0.015938  | 2.37E-07   | 0.008545  |
| 138 | kf_92   | 0.89   | 2.19E-07   | 0.015495 | 0.000735  | -0.007061 | 1.87E-07   | -0.000853 |
| 139 | kb_92   | 2      | -5.00E-07  | 0.037111 | -0.031196 | -0.021649 | -5.17E-07  | -0.004097 |
| 140 | kcat_93 | 0.5    | 5.27E-07   | 0.035656 | -0.001258 | -0.00013  | 5.93E-07   | 0.001915  |
| 141 | kf_94   | 9.88   | 6.66E-05   | 0.032244 | 0.007923  | 0.012932  | 7.07E-05   | -0.011314 |
| 142 | kb_94   | 13.6   | -5.29E-05  | 0.0365   | 0.020626  | 0.008166  | -5.60E-05  | -0.00828  |
| 143 | kcat_95 | 3.4    | 6.76E-05   | 0.050459 | -0.001447 | 0.008902  | 7.17E-05   | 0.015508  |
| 144 | kf_96   | 2.2    | -0.0008775 | 0.032992 | -0.02977  | -0.12794  | -0.0006155 | 0.002574  |
| 145 | kb_96   | 16     | 0.0007029  | 0.025427 | 0.022487  | 0.049094  | 0.0004938  | 0.028364  |
| 146 | kcat_97 | 4      | -0.000907  | 0.054111 | 0.003045  | -0.061078 | -0.0007085 | 0.014067  |

|     |          |         |            |          |           |           |            |           |
|-----|----------|---------|------------|----------|-----------|-----------|------------|-----------|
| 147 | kf_98    | 90      | 0.0001316  | 0.03684  | 0.015983  | -0.1287   | 0.0003559  | 0.014273  |
| 148 | kb_98    | 0.00034 | 3.22E-06   | 0.042822 | -0.00107  | -0.071937 | 1.95E-06   | 0.004626  |
| 149 | kf_99    | 10      | -0.0086418 | 0.036119 | 0.13652   | 1.5703    | -0.0019416 | 0.13414   |
| 150 | kb_99    | 16      | 0.0076889  | 0.023878 | -0.088545 | -0.32635  | -0.0072337 | -0.093481 |
| 151 | kcat_100 | 4       | -0.0020475 | 0.047205 | 0.12754   | 1.3759    | 0.03828    | 0.098158  |
| 152 | kf_101   | 3       | -0.2553    | 0.21149  | -0.48536  | -8.2838   | -0.1968    | -0.45958  |
| 153 | kb_101   | 4       | 0.12761    | 0.12365  | 0.21967   | 4.2975    | 0.098391   | 0.25047   |
| 154 | kcat_102 | 4       | -0.12192   | 0.080181 | -0.22685  | -4.2892   | -0.093643  | -0.22694  |
| 155 | kf_103   | 6.8     | 0.078856   | 0.10069  | 0.26756   | 4.0473    | 0.044245   | 0.26303   |
| 156 | kb_103   | 9.62    | -0.063085  | 0.061531 | -0.2007   | -3.2638   | -0.035399  | -0.18786  |
| 157 | kcat_104 | 2.405   | 0.063937   | 0.059647 | 0.19725   | 3.2865    | 0.035856   | 0.20891   |
| 158 | kf_105   | 6.8     | 0.21811    | 0.18623  | 0.32331   | 4.805     | 0.18673    | 0.30276   |
| 159 | kb_105   | 9.62    | -0.17448   | 0.093219 | -0.23512  | -3.8752   | -0.14939   | -0.24828  |
| 160 | kcat_106 | 2.405   | 0.17634    | 0.099473 | 0.22414   | 3.8703    | 0.15091    | 0.21605   |
| 161 | kf_107   | 2       | 0.0021496  | 0.039536 | -0.03877  | 3.6096    | 0.0025233  | -0.043165 |
| 162 | kb_107   | 8       | -0.0016139 | 0.028508 | 0.024229  | 1.2526    | -0.0018933 | 0.032473  |
| 163 | kcat_108 | 2.667   | 0.0019568  | 0.043663 | 0.003555  | 3.9474    | 0.0022629  | -0.006336 |
| 164 | kf_109   | 0.333   | -0.0026265 | 0.029098 | 0.01183   | 1.4589    | -0.0028891 | 0.044563  |
| 165 | kf_110   | 1       | 0.062408   | 0.033284 | -0.042162 | -1.3307   | 0.067634   | -0.079887 |
| 166 | kb_110   | 4.64    | -0.049928  | 0.065053 | 0.063645  | 0.89923   | -0.05411   | 0.064858  |
| 167 | kcat_111 | 1.16    | 0.050177   | 0.026022 | -0.004921 | -0.94637  | 0.054468   | -0.04071  |
| 168 | kf_112   | 15      | -0.063441  | 0.030185 | 0.051785  | 1.399     | -0.068057  | 0.058377  |
| 169 | kb_112   | 16      | 0.050754   | 0.026687 | -0.015219 | -0.95654  | 0.054448   | -0.023047 |
| 170 | kcat_113 | 4       | -0.050761  | 0.031932 | 0.032452  | 0.92415   | -0.054426  | 0.0418    |
| 171 | kf_114   | 1.31    | -0.057912  | 0.03069  | -0.10188  | -0.97887  | -0.057628  | -0.10585  |
| 172 | kb_114   | 4       | 0.046323   | 0.020824 | 0.045055  | 0.79882   | 0.046102   | 0.081665  |
| 173 | kcat_115 | 1       | -0.047126  | 0.054008 | -0.05087  | -0.79978  | -0.046982  | -0.059496 |
| 174 | kf_116   | 1.31    | -0.014877  | 0.049138 | 0.085984  | 1.254     | -0.012781  | 0.092898  |
| 175 | kb_116   | 4       | 0.0119     | 0.051496 | -0.13872  | -2.6973   | 0.010226   | -0.15639  |
| 176 | kcat_117 | 1       | -0.012098  | 0.046098 | -0.072029 | -1.4551   | -0.010467  | -0.08579  |
| 177 | kf_118   | 26      | -0.12597   | 0.069778 | -0.080323 | -2.4753   | -0.12682   | -0.11419  |
| 178 | kb_118   | 64      | 0.10078    | 0.057211 | 0.090769  | 1.0251    | 0.10146    | 0.06711   |
| 179 | kcat_119 | 16      | -0.10037   | 0.039735 | -0.039069 | -1.0278   | -0.10101   | -0.076161 |
| 180 | kf_120   | 26      | -0.032142  | 0.051729 | -0.043952 | -0.80772  | -0.028273  | -0.043773 |
| 181 | kb_120   | 64      | 0.025715   | 0.051274 | 0.076375  | 0.51923   | 0.022621   | 0.064438  |
| 182 | kcat_21  | 16      | -0.02564   | 0.026429 | -0.062547 | -0.53967  | -0.022499  | -0.036538 |
| 183 | kf_122   | 1.6     | 0.25499    | 0.067188 | 0.17925   | 2.1096    | 0.23681    | 0.18892   |
| 184 | kb_122   | 1       | -0.20391   | 0.062512 | -0.1526   | -1.4375   | -0.18915   | -0.13563  |
| 185 | kcat_123 | 0.25    | 0.34169    | 0.12394  | 0.24024   | 2.6227    | 0.30825    | 0.22344   |
| 186 | kf_124   | 1.6     | 0.47591    | 0.12742  | 0.23206   | 2.8028    | 0.47353    | 0.23443   |
| 187 | kb_124   | 1       | -0.38052   | 0.089974 | -0.17524  | -2.0164   | -0.37883   | -0.18166  |
| 188 | kcat_125 | 0.25    | 0.52203    | 0.084564 | 0.21452   | 2.3409    | 0.51628    | 0.23496   |
| 189 | kf_126   | 0.0004  | -0.040485  | 0.023763 | -0.015287 | -0.14211  | -0.02953   | 0.0028    |
| 190 | kb_126   | 0.0001  | 0.025925   | 0.025376 | -0.008165 | 0.13985   | 0.021294   | -0.002535 |
| 191 | kf_127   | 0.0004  | 0.0029471  | 0.032651 | -0.030991 | -0.26754  | 0.001977   | -0.03936  |
| 192 | kb_127   | 0.0001  | -0.0015666 | 0.021198 | 0.011765  | 0.2083    | -0.0010701 | -0.009857 |
| 193 | kf_128   | 3.7E-16 | -3.64E-07  | 0.026663 | 0.009355  | 0.000281  | -9.79E-07  | -0.011734 |
| 194 | kf_129   | 3.7E-16 | 9.91E-07   | 0.024019 | 0.037735  | 0.007475  | 1.60E-06   | -0.002693 |
| 195 | kf_130   | 0.30101 | -0.24219   | 0.047866 | -0.061908 | -0.15167  | -0.24239   | -0.027405 |
| 196 | kb_130   | 4.44    | 0.16201    | 0.038562 | 0.015221  | 0.074303  | 0.16317    | 0.039771  |

|     |          |          |            |          |           |           |            |           |
|-----|----------|----------|------------|----------|-----------|-----------|------------|-----------|
| 197 | kcat_131 | 2.2      | -0.16438   | 0.040929 | -0.009838 | -0.10902  | -0.16571   | -0.001381 |
| 198 | kb_132   | 108      | -0.18802   | 0.019547 | 0.002995  | -0.063173 | -0.19406   | -0.010001 |
| 199 | kf_132   | 141      | 0.2349     | 0.064807 | 0.020359  | 0.065316  | 0.2409     | 0.00806   |
| 200 | kcat_133 | 27       | 0.18783    | 0.017308 | 0.003829  | 0.055951  | 0.19385    | -0.01054  |
| 201 | kf_134   | 76       | -0.056728  | 0.05477  | -0.12398  | -1.7391   | -0.03585   | -0.14203  |
| 202 | kb_134   | 4        | 0.042128   | 0.045962 | 0.06242   | 1.0312    | 0.036957   | 0.088384  |
| 203 | kcat_135 | 1        | -0.18257   | 0.068503 | -0.12992  | -1.1808   | -0.18475   | -0.11008  |
| 204 | kf_136   | 76       | 0.0093235  | 0.065293 | -0.10452  | -1.4809   | 0.014826   | -0.12148  |
| 205 | kb_136   | 4        | -0.0078524 | 0.036169 | 0.048345  | 0.92584   | -0.013102  | 0.074341  |
| 206 | kcat_137 | 1        | -0.12558   | 0.081798 | -0.16248  | -1.7516   | -0.11475   | -0.13575  |
| 207 | kf_138   | 1        | -0.028952  | 0.024999 | -0.028736 | -0.26968  | -0.030471  | -0.01908  |
| 208 | kb_138   | 0.25     | 0.0007829  | 0.028174 | -0.003334 | 0.022071  | 0.0008242  | 0.003598  |
| 209 | kcat_139 | 9        | -0.0003553 | 0.033091 | 0.019657  | -0.031332 | -0.0003706 | -0.01421  |
| 210 | kf_140   | 1        | -0.017745  | 0.034019 | 0.004311  | -0.18293  | -0.017809  | -0.020977 |
| 211 | kb_140   | 0.25     | 0.0004805  | 0.032864 | 0.005518  | 0.020795  | 0.0004823  | 0.024813  |
| 212 | kcat_141 | 9        | -0.0001453 | 0.024353 | 0.005501  | -0.027268 | -0.000112  | -0.025162 |
| 213 | kf_142   | 1E-18    | -4.94E-07  | 0.032231 | -0.002124 | 5.14E-05  | -9.96E-07  | -0.013479 |
| 214 | kf_143   | 1E-18    | 5.96E-07   | 0.01968  | 0.010253  | 3.76E-05  | 7.72E-07   | -0.004105 |
| 215 | kf_144   | 0.05     | -0.0003103 | 0.03454  | -0.007417 | -0.004521 | -0.0003188 | -0.003547 |
| 216 | kb_144   | 2        | 0.0002476  | 0.05905  | 0.013745  | -0.00257  | 0.0002546  | 0.000987  |
| 217 | kcat_145 | 0.5      | -1.96E-05  | 0.014695 | -0.015155 | -0.001342 | -2.24E-05  | 0.006646  |
| 218 | kf_146   | 2.25     | -7.39E-07  | 0.021195 | 0.017944  | -0.004493 | -1.12E-06  | 0.015346  |
| 219 | kb_147   | 8        | -5.38E-07  | 0.031041 | -0.026296 | 0.003111  | -7.64E-07  | -0.017512 |
| 220 | kcat_147 | 4        | -1.01E-06  | 0.03223  | -0.020934 | 0.017224  | -1.25E-06  | 0.02603   |
| 221 | kf_148   | 1        | 0.071143   | 0.06721  | 0.097229  | 1.3666    | 0.054611   | 0.074144  |
| 222 | kf_149   | 10       | 0.0087566  | 0.031247 | 0.042901  | -2.7834   | 0.033819   | 0.029415  |
| 223 | kb_149   | 2        | 0.0001602  | 0.027101 | -0.023166 | 4.2148    | 0.0040527  | -0.003116 |
| 224 | kf_150   | 83       | -0.0076438 | 0.039382 | -0.018221 | -1.8154   | -0.0051789 | -0.068616 |
| 225 | kb_150   | 2.77     | 0.0055624  | 0.02646  | 0.014122  | -0.025927 | 0.0037624  | 0.010615  |
| 226 | kcat_151 | 1        | -0.012049  | 0.026939 | -0.052775 | -0.6675   | -0.0069036 | -0.042839 |
| 227 | kf_152   | 240      | -8.74E-05  | 0.04559  | -0.035453 | -0.085032 | -7.94E-05  | 0.007312  |
| 228 | kb_152   | 2        | 5.30E-05   | 0.036223 | 0.003056  | 0.10991   | 4.58E-05   | -0.015085 |
| 229 | kcat_153 | 1        | -0.0001501 | 0.027691 | 0.008836  | -0.13196  | -0.000112  | -0.00505  |
| 230 | km_154   | 0.050505 | -0.095301  | 0.088828 | -0.15972  | -3.1803   | -0.070553  | -0.18217  |
| 231 | vm_154   | 22       | 0.14926    | 0.095559 | 0.28961   | 5.1958    | 0.10841    | 0.27124   |
| 232 | kf_155   | 450      | -0.3104    | 0.038073 | -0.016525 | -0.3368   | -0.32582   | -0.055213 |
| 233 | kb_155   | 600      | 0.24832    | 0.030035 | 0.007364  | 0.28074   | 0.26066    | 0.036606  |
| 234 | kcat_156 | 150      | -0.27853   | 0.038234 | -0.041638 | -0.54174  | -0.2936    | -0.026566 |
| 235 | kf_157   | 450      | -0.17439   | 0.042172 | -0.029091 | -0.15417  | -0.18474   | -0.053286 |
| 236 | kb_157   | 600      | 0.13698    | 0.06439  | 0.002892  | 0.083899  | 0.14117    | 0.011061  |
| 237 | kcat_158 | 150      | -0.16366   | 0.059964 | -0.011933 | -0.12975  | -0.16943   | -0.027302 |
| 238 | kf_159   | 30       | -0.022771  | 0.054777 | -0.018287 | -0.17335  | -0.022393  | -0.012408 |
| 239 | kb_159   | 600      | 0.018217   | 0.021846 | 0.014659  | 0.087858  | 0.017914   | 0.019659  |
| 240 | kcat_160 | 150      | -0.020286  | 0.034752 | -0.017772 | -0.10099  | -0.020149  | -0.001282 |
| 241 | kf_161   | 30       | -0.01397   | 0.044675 | -0.023573 | -0.30043  | -0.012455  | -0.008766 |
| 242 | kb_161   | 600      | 0.011176   | 0.039508 | -0.019148 | 0.16825   | 0.0099646  | 0.033562  |
| 243 | kcat_162 | 150      | -0.013037  | 0.041481 | -0.050465 | -0.18246  | -0.011878  | -0.041631 |
| 244 | kf_163   | 4        | 1.85E-05   | 0.049181 | 0.005915  | -0.03711  | -4.10E-06  | -0.033687 |
| 245 | kb_163   | 0.000335 | 1.11E-06   | 0.027863 | -0.00643  | 0.000649  | 1.51E-06   | 0.010104  |
| 246 | kcat_164 | 1        | 1.44E-05   | 0.022503 | -0.002145 | 0.046297  | -3.48E-06  | -0.011357 |

|     |           |           |            |          |           |           |            |           |
|-----|-----------|-----------|------------|----------|-----------|-----------|------------|-----------|
| 247 | kf_165    | 0.0001    | -0.0001266 | 0.026548 | -0.027298 | -0.000841 | -1.21E-05  | 0.012773  |
| 248 | kb_165    | 0.0002    | 7.34E-06   | 0.036503 | 0.000348  | 0.000227  | -1.95E-07  | -0.021797 |
| 249 | kf_166    | 1E-25     | 0          | 0.042537 | 0.013313  | 4.16E-08  | 0          | 0.015404  |
| 250 | trnsc_167 | 0.0000002 | -0.000147  | 0.020536 | -0.016945 | -0.0008   | -1.35E-05  | -0.002638 |
| 251 | trnsc_168 | 0.000002  | 1.70E-05   | 0.018311 | 0.011652  | -0.000427 | 1.65E-06   | -0.000576 |
| 252 | kf_169    | 0.1       | -0.012238  | 0.075928 | -0.17592  | -1.5572   | -0.053753  | -0.14442  |
| 253 | kf_170    | 0.0034    | -0.002106  | 0.030705 | -0.003451 | 0.010117  | -0.0008033 | -0.013916 |
| 254 | kb_170    | 1         | 0.0016835  | 0.023235 | -0.006721 | -0.003458 | 0.0006412  | 0.000314  |
| 255 | kcat_171  | 0.25      | -0.0016744 | 0.031815 | -0.002969 | 0.003487  | -0.0006317 | 0.019583  |
| 256 | kf_172    | 1.5E-15   | 0          | 0.03509  | -0.001996 | 0         | 0          | 0.006265  |



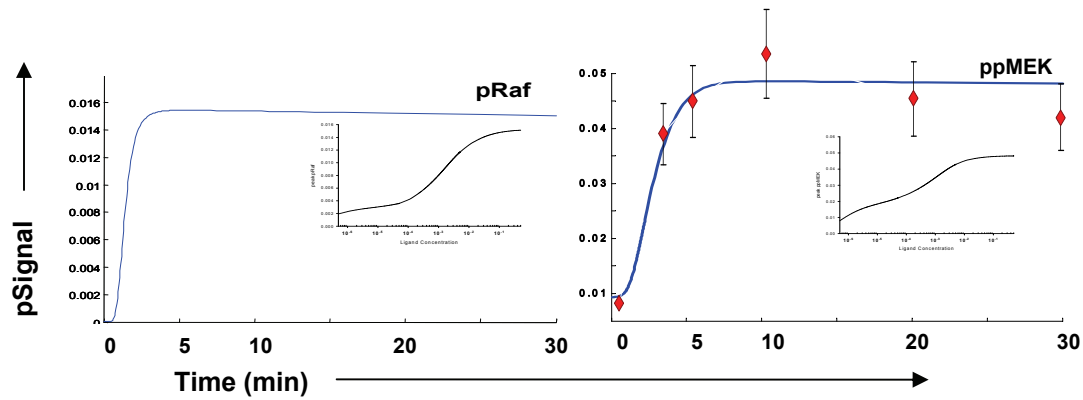

**Figure S2.** Shown here is a simulation of the time course of phosphorylation Raf (pRaf) and MEK (ppMEK) in cells stimulated with a saturating concentration of ligand. The inset in each panel gives the peak level of phosphorylation obtained over a wide range of ligand concentrations. These profiles are consistent with the experimental results derived in our earlier studies (Kumar et. al., 2007, 2008). The concordance between the experimental (red diamonds, values are mean  $\pm$  S.D. of three experiments) and the simulated profiles is shown for ppMEK.

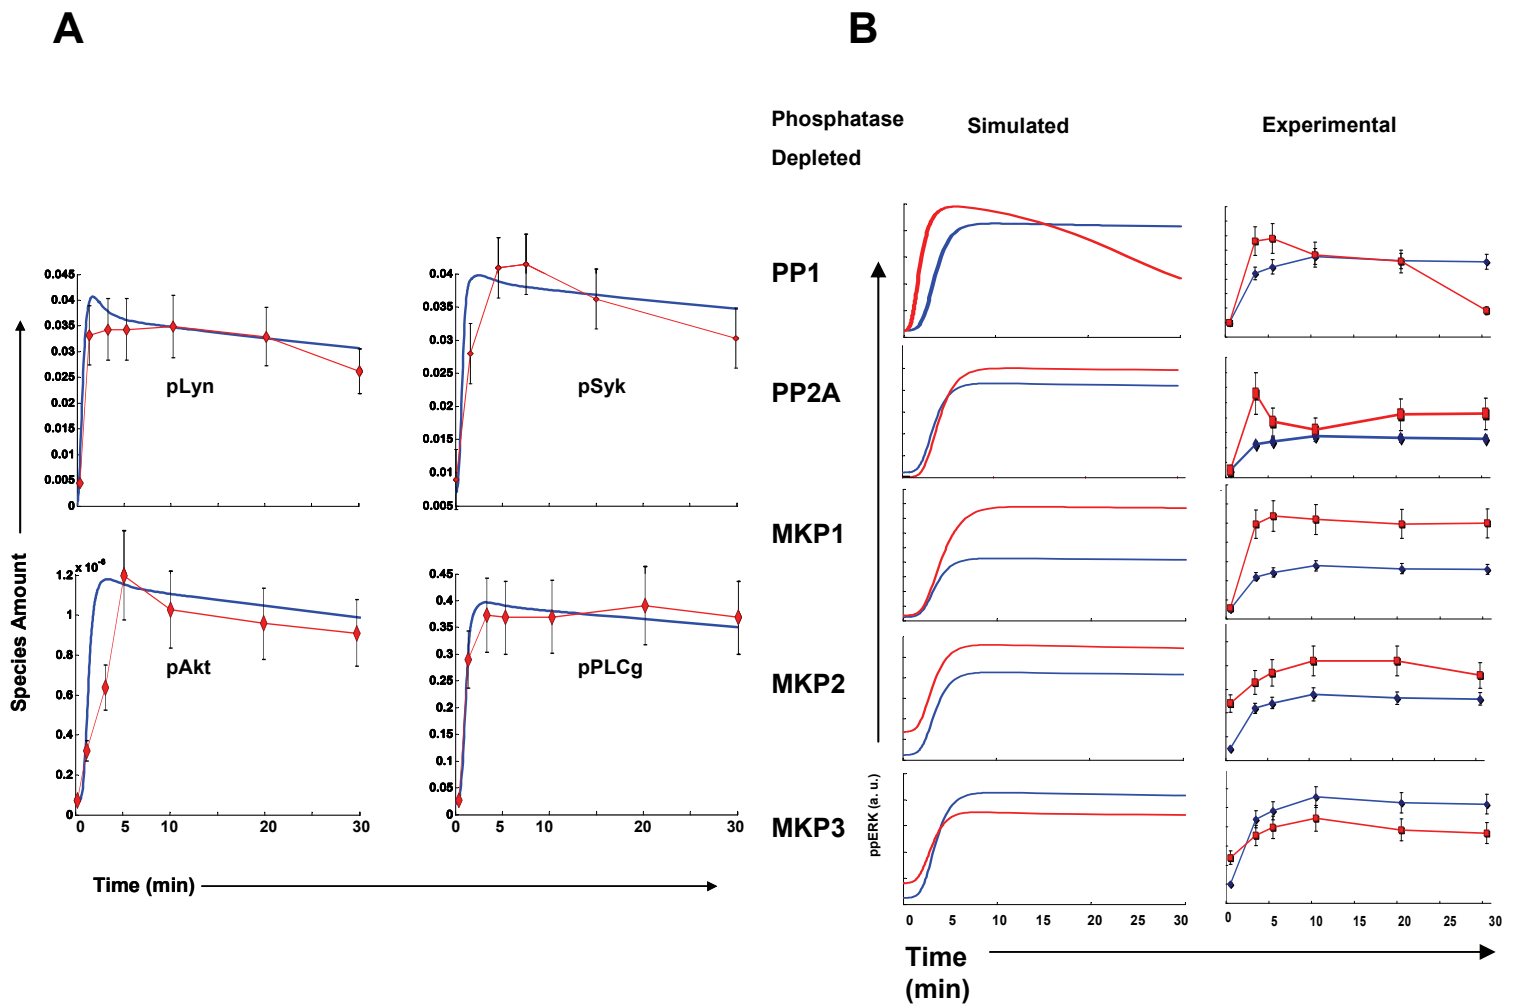

**Figure S3.** Panel A shows simulation of the time course of phosphorylation of the indicated molecules in cells stimulated with a saturating concentration of the ligand. For the purposes of comparison, the experimentally derived values at the various time points are also included (red diamonds, values mean  $\pm$  S.D. of three experiments). These values are from our earlier study (Kumar et. al., 2007, 2008). For the *in silico* profiles simulations were first run for 3000 seconds to achieve the steady baseline levels of phosphorylations prior to stimulation. This explains the baseline levels of phospho-species seen in these profiles. Panel B compares the experimentally derived (Experimental) and *in silico* (Simulated) profiles of ERK phosphorylation following depletion of cells with the indicated phosphatases. The values for the experimental group were taken from Kumar et. al. (2008). In all cases the X-axes start from zero although the units are arbitrary. In all the panels the profiles obtained in mock (i.e. GFP-siRNA) treated cells are shown in blue whereas those for phosphatase-specific siRNA treated cells are in red. For the *in silico* profiles simulations were first run for 3000 seconds to achieve the steady baseline levels of ERK phosphorylations prior to stimulation. This explains the minor lag period seen in these profiles.

A

## Effect of MKP3 knock down by siRNA on MKP1 expression level

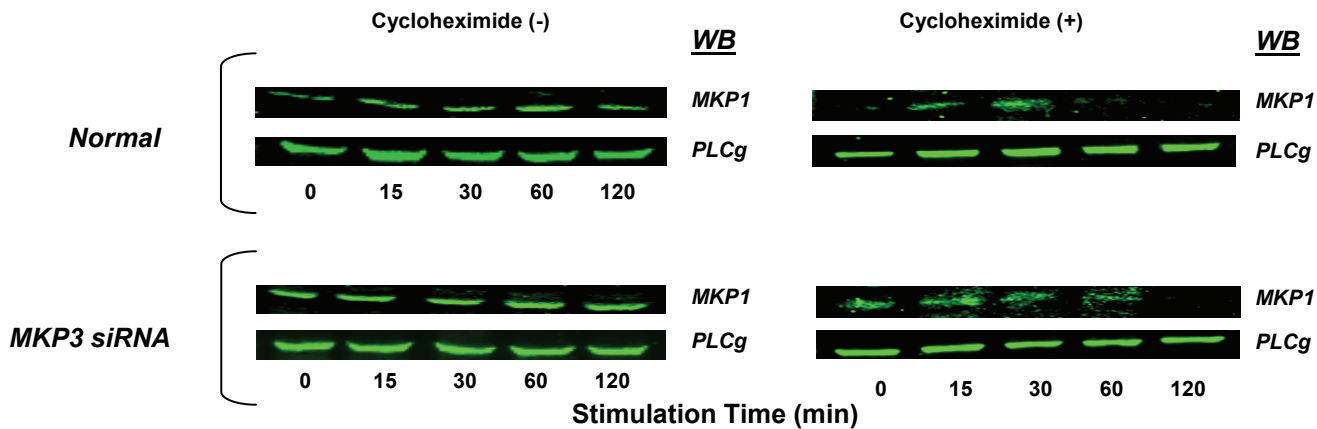

B

## Activation profiles in the presence of DRB(CK2 inhibitor)

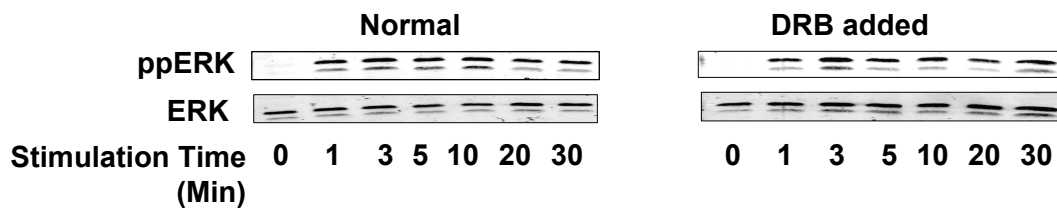

C

## Graded ERK response for various concentrations of Ligand (Fab2)

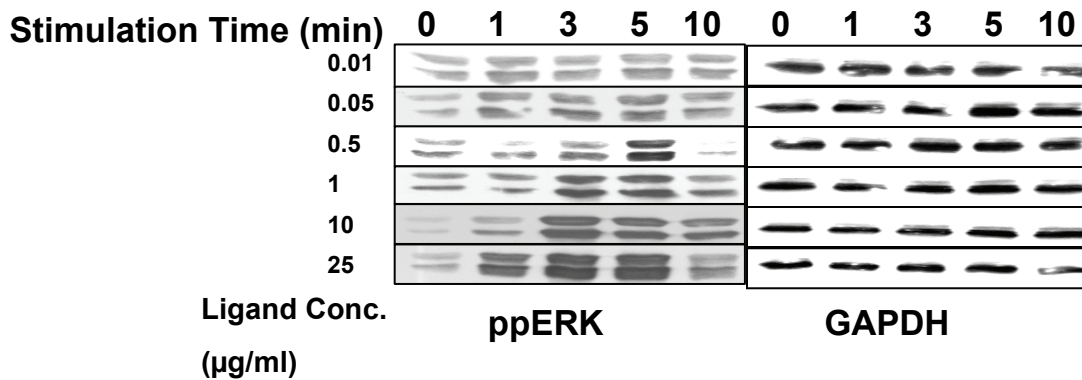

**Figure S4.** Panel A shows the Western blot profile of MEK in A20 cells treated either with non-silencing (GFP) siRNA (labeled Normal), or with MKP3-specific siRNA, and in the presence and absence of cycloheximide an inhibitor of protein synthesis. In both cases the cells were stimulated with the F(ab)<sub>2</sub> fragment of anti-mouse IgG for the indicated times. For quantification band intensities were normalized against that obtained for PLCg, which was used as loading control. As is evident here, MKP1 protein levels are normally defined through the balance between de novo synthesis and protein turnover. However these results also reveal that MKP3-silencing primarily affects through inducing a reduction in the rate of degradation of the MKP1 protein. Panel B shows the stimulation time-dependent phosphorylation profiles of ERK (ppERK) in either treated cells, or in cells pre-treated with DRB. GAPDH (Ctrl) served as the loading control for band intensity normalization in these experiments. Shown in Panel C are the time dependent phosphorylation profiles of ERK (ppERK) at the indicated concentrations of ligand. Here again, GAPDH was used for the loading control and for normalization of band intensities.

D

## MKP3 Expression Following BCR activation

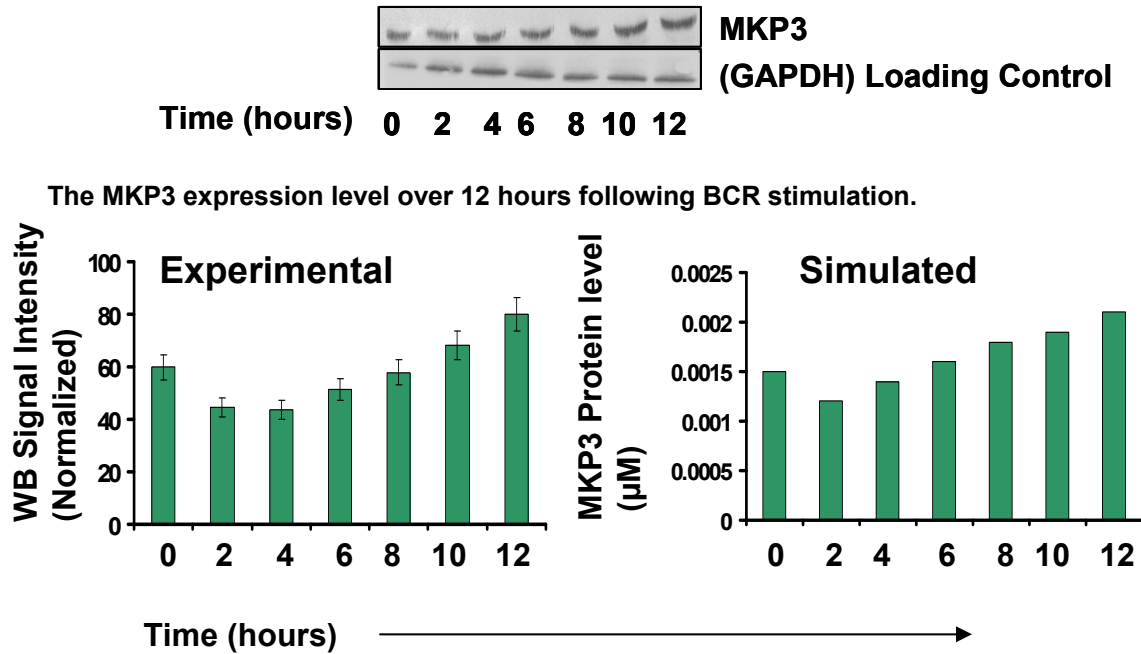

**Figure S4. Panel D** shows MKP3 expression level over 12 hours following BCR stimulation in A20 cells. The MKP3 expression level rises due to transcriptional up regulation by an ERK activation dependent mechanism. The model also accounts for the ERK mediated MKP3 degradation, which explains the transient decrease in MKP3 levels in response to BCR activation. Simulated versus experimental (normalized) profiles shows good agreement and thus validate the model's ability to recapitulate MKP levels in stimulus dependent manner.

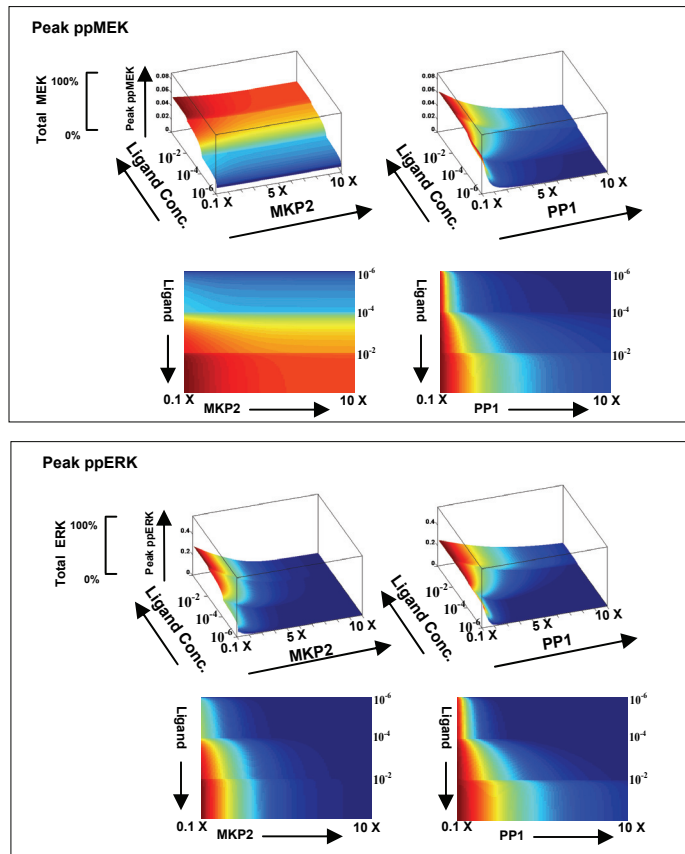

**Figure S5.** The peak phosphorylation of MEK (ppMEK, top subpanel) and ERK (ppERK, bottom subpanel) was determined in response to variations in concentrations of both ligand and either PP1 or MKP2. The remaining details are identical to that described for Figure 5 in the main text.

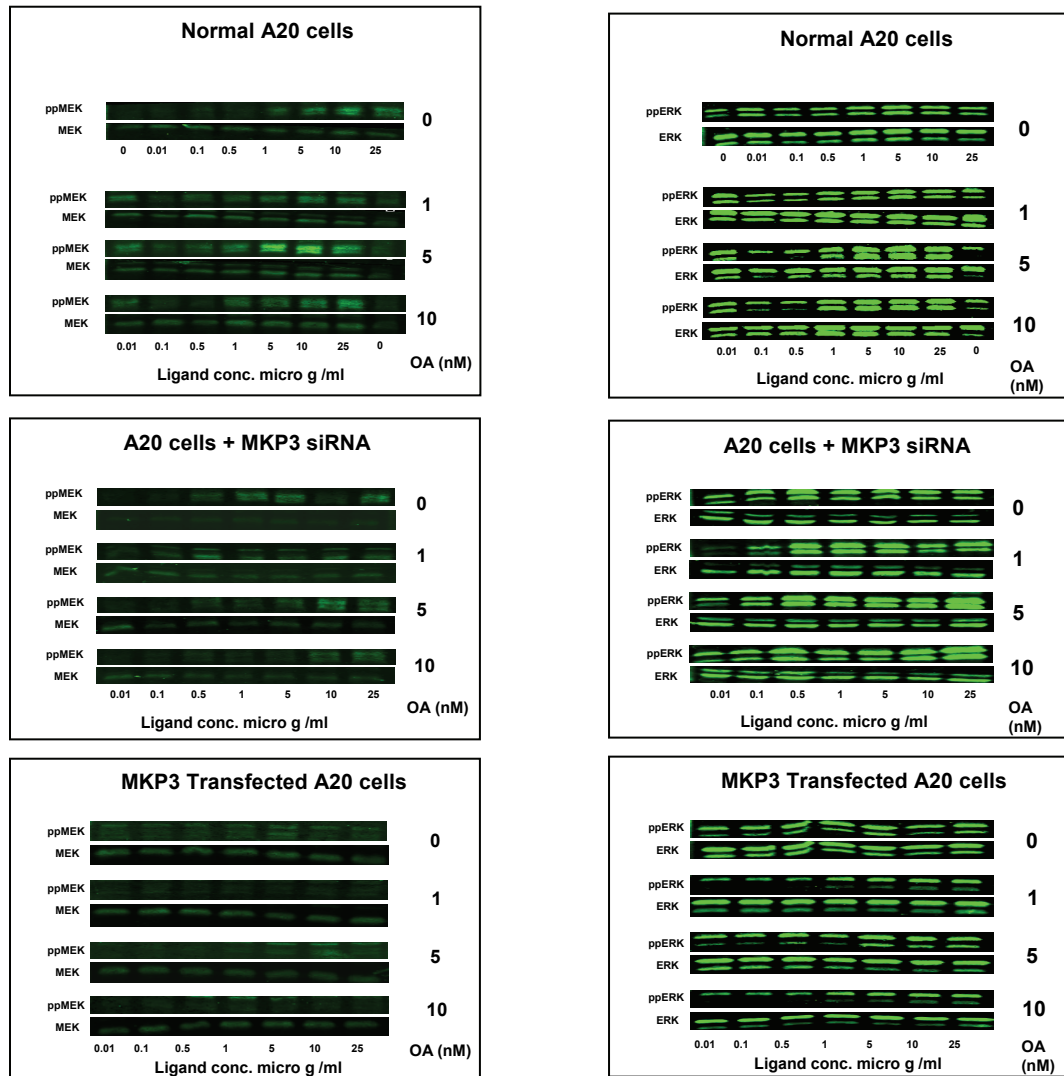

**Figure S6: Ligand dose response of MEK and ERK phosphorylation to variations in levels of phosphatase activity.** Shown here are the Western blot profiles for both the MEK and ERK protein, and its phosphorylated form in either normal A20 cells, in cells treated with MKP3 specific siRNA, or in cells transfected with an MKP3 bearing plasmid (see Experimental Procedures). For each group and condition, cells were stimulated with the indicated concentration of ligand, and the level of phosphorylation monitored 10 min later. The relatively lower intensities of the MEK blots are due to the fact that the concentration of this protein is about 6-fold lower than that of ERK in these cells (Supplementary Data S1)

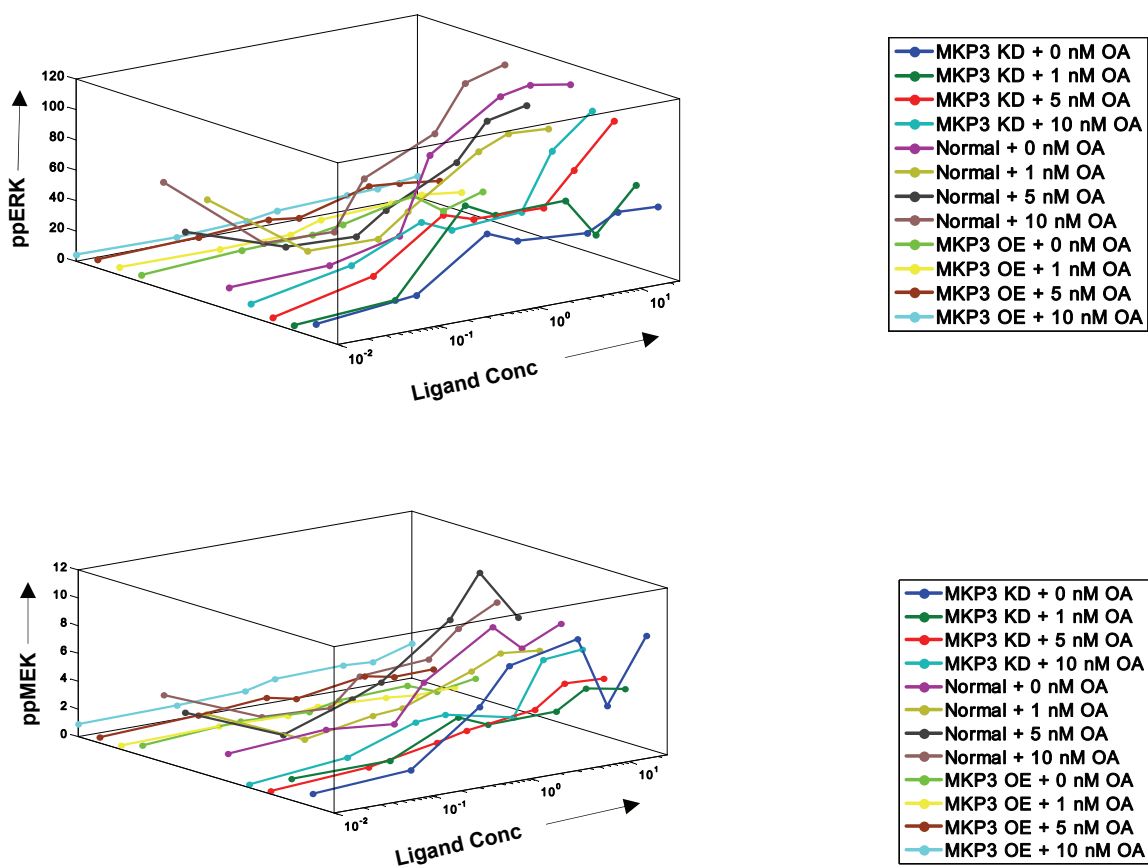

**FigureS7: Modulation of dose response by varying phosphatase concentrations:** Western Blots in Figure S-6 were normalized and quantified using our toolbox (Gel-norm) as described earlier (Kumar et. al., 2007). The plots of these values are shown here.

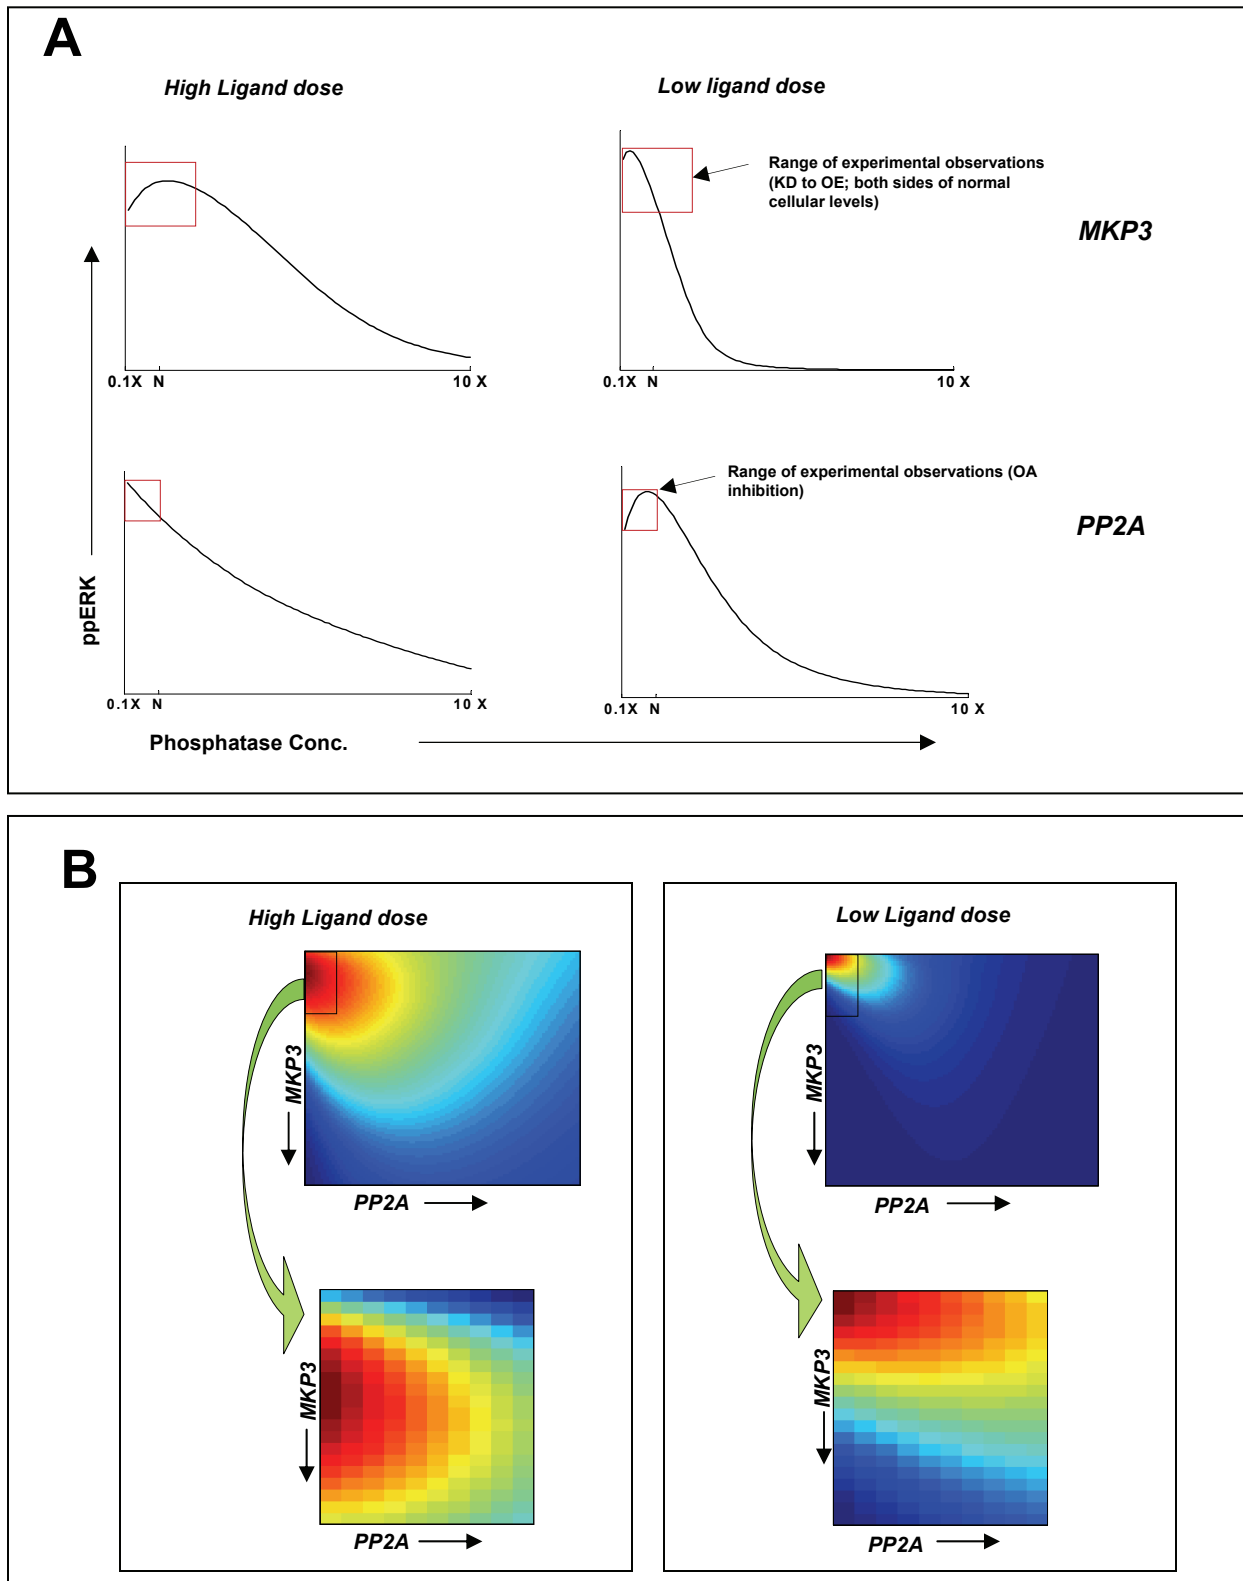

**Figure S8.** Panel A of this figure gives the simulated profile of peak phospho-ERK (ppERK) levels under conditions where concentrations of either MKP3 or PP2A ranged from 10-fold lower, to 10-fold higher than their respective levels in A20 cells. ERK phosphorylation responses at both high and low ligand doses are shown here. In each profile the boxed region indicates the concentration (for MKP3), or activity (for PP2A) range that was taken for the experiments described in Figure 8A of the main manuscript. Similarly MEK profile for prediction were also obtained.

Panel B shows the results of a simulation experiment where peak phospho-ERK responses were monitored under conditions where the concentrations/activities of both phosphatases were derived from the same range as described for Panel A. Here again, results obtained at high and low ligand doses are shown. The top part of this panel gives the results obtained over all the combinations of PP2A and MKP3 concentrations tested, and the boxed region identifies the range represented by the experiments in Figure 8B of the main manuscript. The lower part of this panel shows a magnification of this boxed region.



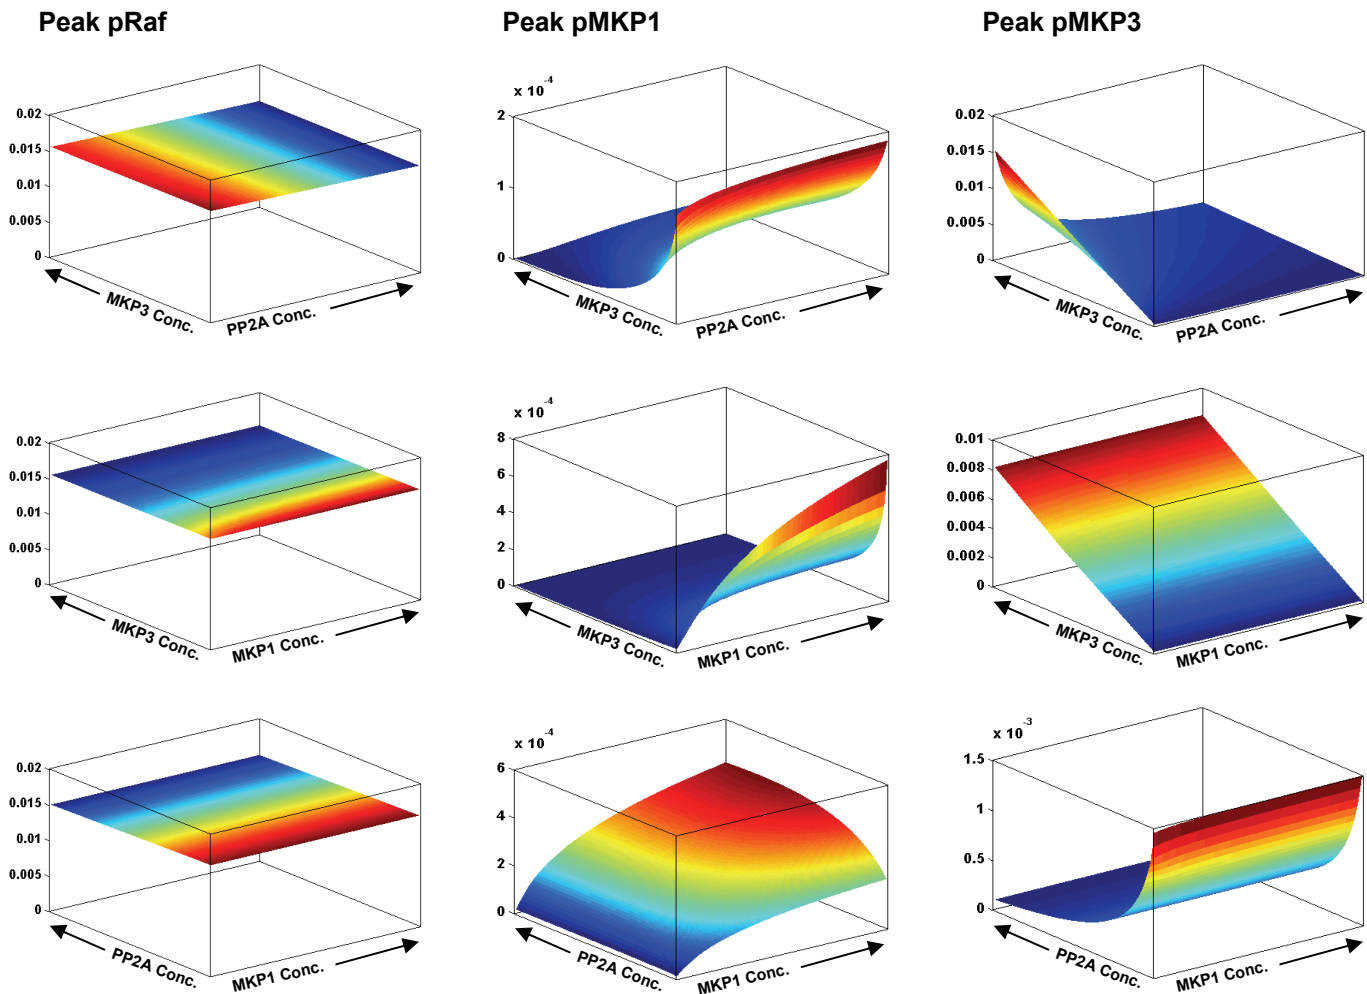

**Figure S 9 :** This Figure represents a part of the experiment performed in Figure 6 of the main manuscript. Shown here are the effect of variation in concentrations of the indicated phosphatase pairs on peak phosphorylation levels of Raf (pRaf), MKP1 (pMKP1), and MKP3(pMKP3). It is notable that, as per our expectations from the model in Figure 1A, the amplitude of Raf phosphorylation is only weakly sensitive to changes in concentration of PP2A. According to our model, the effect of altered PP2A levels is buffered by the excess of available PP1. (In all cases arrows showing minimum to maximum conc. of the corresponding enzymes)

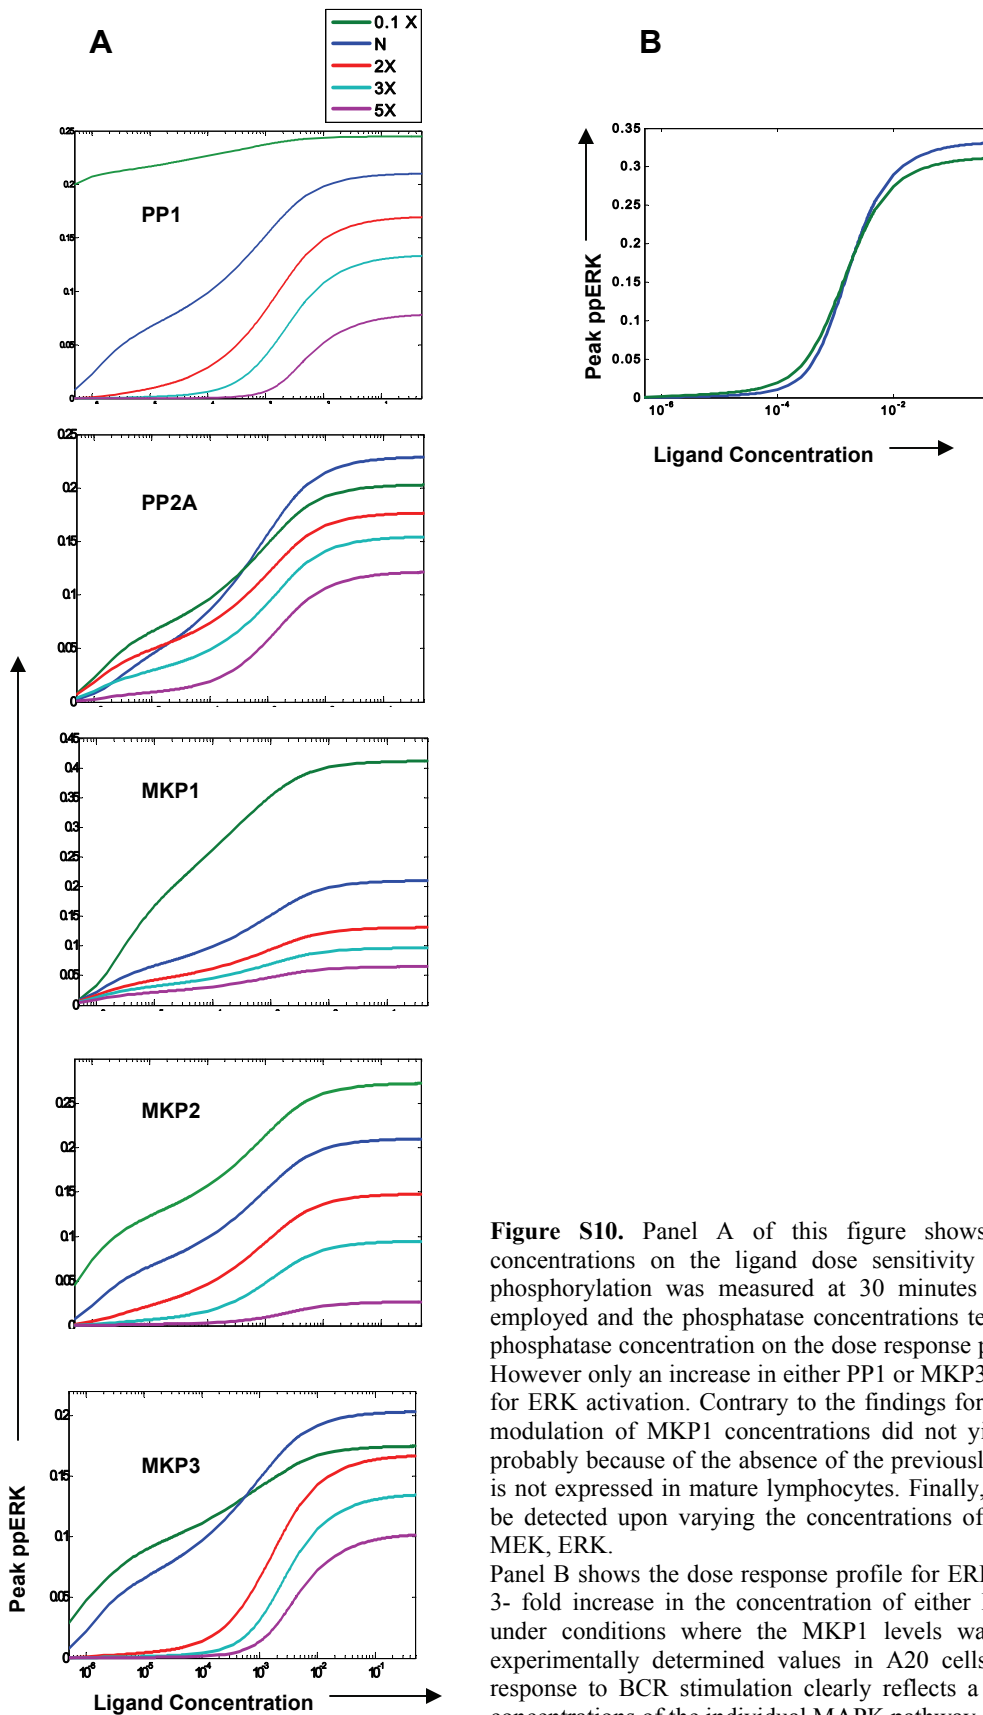

**Figure S10.** Panel A of this figure shows the effect of varying phosphatase concentrations on the ligand dose sensitivity of ERK phosphorylation. Here ERK phosphorylation was measured at 30 minutes of stimulation. Both the ligand dose employed and the phosphatase concentrations tested, are indicated. A marked effect of phosphatase concentration on the dose response profile is clearly evident in all the cases. However only an increase in either PP1 or MKP3 levels led to sharp increase in the slope for ERK activation. Contrary to the findings for another cell line (Bhalla et. al., 2002), modulation of MKP1 concentrations did not yield an ultrasensitive response. This is probably because of the absence of the previously described feedback loop since cPLA2 is not expressed in mature lymphocytes. Finally, no trend towards ultrasensitivity could be detected upon varying the concentrations of the MAPK pathway constituents Raf, MEK, ERK.

Panel B shows the dose response profile for ERK phosphorylation obtained following a 3- fold increase in the concentration of either PP1 (blue line) or MKP3 (Green line) under conditions where the MKP1 levels was reduced by tenfold relative to the experimentally determined values in A20 cells. Thus the shape of the ERK output response to BCR stimulation clearly reflects a combinatorial outcome of the relative concentrations of the individual MAPK pathway-associated phosphatases
